Testosterone use in female mice does not impair fertilizability of eggs: Implications for the fertility care of transgender males.

Running title: Egg fertilizability in testosterone treated females

C.B. Bartels<sup>1,2</sup>, T.F. Uliasz<sup>1</sup>, L. Lestz<sup>1</sup>, and L.M. Mehlmann<sup>1\*</sup>

<sup>1</sup>Department of Cell Biology, UConn Health, Farmington, CT 06030, USA

<sup>2</sup>Center for Advanced Reproductive Services, Division of Reproductive Endocrinology and Infertility, Department of Obstetrics and Gynecology, UConn Health, Farmington, CT 06030, USA

\*Correspondence address. Department of Cell Biology, UConn Health, 263 Farmington Ave., Farmington, CT 06030. Phone 001 860-679-2703. E-mail [lmehلمان@uchc.edu](mailto:lmehلمان@uchc.edu)

Key words: transgender/fertility/testosterone/mouse model/ovary/oocyte

1 **STUDY QUESTION:** Does testosterone use in females affect reproductive potential, particularly  
2 with regard to the production of fertilizable gametes?

3 **SUMMARY ANSWER:** Testosterone cypionate injections given to post-pubertal female mice  
4 caused virilization and ovaries were smaller than control ovaries, but ovaries were still  
5 responsive to hormonal stimulation and produced fertilizable eggs when superovulated.

6 **WHAT IS KNOWN ALREADY:** Studies to examine the effects of testosterone on reproductive  
7 potential in transgender males are lacking. Recently, a model was developed that simulates  
8 many aspects of testosterone use in transgender males in order to look at reproductive effects  
9 of testosterone in female mice. This study found masculinizing effects on the mice but did not  
10 find significant deficits on the number of ovarian follicles; however, effects of testosterone use  
11 on ovarian stimulation and fertilizability of oocytes were not investigated.

12 **STUDY DESIGN, SIZE, DURATION:** A total of 66, 6-week-old Hsd:NSA(CF-1) female mice and  
13 6 Hsd:ICR (CD-1) mice were used for this study. Mice were injected subcutaneously with 400  
14  $\mu$ g testosterone cypionate or sesame oil once a week for 6 weeks and were either sacrificed a  
15 week after the 6<sup>th</sup> injection (active exposure group), or were sacrificed 6-7 weeks after the final  
16 testosterone injection (washout group).

17 **PARTICIPANTS/MATERIALS, SETTING, METHODS:** Both active exposure and washout  
18 groups were further subdivided into 3 groups: unstimulated, eCG-stimulated, or eCG/hCG-  
19 stimulated. eCG-stimulated mice were sacrificed 44-48 hrs after eCG injection. eCG/hCG-  
20 stimulated mice were injected with eCG, followed 48 hrs later with hCG. Mice were sacrificed  
21 ~13-18 hrs after the hCG injection. Data collected included daily vaginal cytology, terminal  
22 hormone levels and ovary weights, ovarian histology, number of oocytes/eggs collected in each  
23 group, and cleavage to the 2-cell stage following in vitro fertilization.

24 **MAIN RESULTS AND THE ROLE OF CHANCE:** Testosterone cypionate-treated mice had  
25 testosterone levels elevated to the level of male mice and ceased cycling. Ovaries were  
26 significantly smaller in testosterone-treated mice, but they contained normal cohorts of follicles

27 and responded to gonadotropin stimulation by ovulating similar numbers of eggs that fertilized  
28 and cleaved in vitro.

29 **LIMITATIONS, REASONS FOR CAUTION:** Our model treated female mice for only 6 weeks,  
30 whereas many transgender men use testosterone for many years before considering biological  
31 children. Importantly, a mouse system may not perfectly simulate human reproductive  
32 physiology.

33 **WIDER IMPLICATIONS OF THE FINDINGS:** The current standard of care for transgender men  
34 who desire biological children is to cease testosterone therapy prior to ovarian stimulation, but  
35 the necessity for stopping testosterone is not known. Our model demonstrates that it is possible  
36 for testosterone-suppressed ovaries to respond to gonadotropic stimulation by producing and  
37 ovulating fertilizable eggs, thereby obviating the need for testosterone cessation prior to ovarian  
38 stimulation. In time, these results may provide insights for future clinical trials of fertility  
39 treatment options for transgender men.

40

41 Introduction

42 Transgender males are individuals who were assigned female at birth but identify as males.

43 Many, but not all, transgender males opt to undergo gender-affirming treatment, which can

44 consist of surgery and/or hormone therapy (HT) by long-term administration of testosterone

45 (Quinn et al., 2017). HT improves gender dysphoria through testosterone-driven development

46 and maintenance of desired male secondary sex characteristics; however, a potential adverse

47 effect of testosterone exposure is a decrease in fertility.

48 A recent study by the Williams Institute estimated that about 1.4 million individuals identify as

49 transgender in the United States (Flores, 2016), and there are reports that approximately half of

50 transgender adults desire biological children (Moravek, 2019; Wierckx et al., 2012). The

51 reproductive consequences of HT are still unclear, and both the World Professional Association

52 for Transgender Health (WPATH) and the Endocrine Society recommend that all transgender

53 males be counseled regarding options for fertility preservation before initiating testosterone

54 therapy (Hembree et al., 2017; Meyer, 2009). Transgender males may not consider fertility

55 preservation to be important at the start of testosterone therapy, which can be initiated as early

56 as 14 years old. In addition, assisted reproductive technology centers have little experience in

57 stimulation of peripubertal ovaries, nor in performing transvaginal oocyte harvest in children.

58 Due to a variety of physiological and psychological barriers, ovarian stimulation and oocyte

59 harvest is best avoided in children, if it can be safely postponed to adulthood. A recent study

60 showed that only 2 of 72 (2.8%) young transgender individuals chose to utilize fertility

61 preservation after counseling (Nahata et al., 2019), which reflects a priority for HT initiation to

62 attain features of their affirmed gender while avoiding the delay, invasiveness, or costs of fertility

63 preservation (Armund et al., 2017; Insogna et al., 2020). The desire for biological children may

64 arise later in life, after months or years of HT exposure.

65 The approach to fertility options in transgender males already taking HT therefore warrants  
66 more investigation. To date, studies to evaluate the impact of HT on reproductive potential for  
67 transgender males are lacking (ASRM Committee Opinion, 2015). The options for transgender  
68 males presenting for fertility preservation after HT is either surgical oophorectomy to collect  
69 ovarian tissue or surgical oocyte retrieval following ovarian stimulation (De Roo et al., 2016;  
70 Neblett and Hipp, 2019). Methods for maturation and fertilization of oocytes collected directly  
71 from isolated ovarian tissue without hormonal stimulation, while improving, are still considered  
72 to be experimental (Yang and Chian, 2018) and to date, there have been no studies to examine  
73 this method for fertility preservation in transgender males. Accordingly, if a transgender male  
74 presents for fertility treatment now or in the near future and plans to have the pregnancy carried  
75 by a cis-female partner or gestational carrier, the best option is in vitro fertilization (IVF) after  
76 ovarian stimulation and oocyte retrieval. Due to the unknown effects of high-level testosterone  
77 on ovarian response and oocyte quality, the current recommended practice before IVF is  
78 discontinuation of testosterone to allow the resumption of menses (Adeleye et al., 2019;  
79 Broughton and Omurtag, 2017; Leung et al., 2018). While this treatment regimen can be  
80 effective, HT cessation for the purpose of fertility treatment has been reported to cause  
81 significant psychological distress in the form of gender dysphoria attributed to the gender-  
82 incongruous effects of testosterone withdrawal, estrogen exposure, and menses (Armuand et  
83 al., 2017). These negative consequences could lead to treatment avoidance even when fertility  
84 is desired.

85 Ovarian tissue taken from HT-exposed transgender males has demonstrated changes including  
86 a thickened cortex, stromal hyperplasia, an increased number of atretic follicles, and increased  
87 cortical stiffness (De Roo et al., 2019; Ikeda et al., 2013). However, the ovarian tissue follicular  
88 pool is not diminished (De Roo et al., 2016; Van Den Broecke et al., 2001) Markers of ovarian  
89 reserve, including anti-Müllerian hormone and inhibin, are unchanged (Rodriguez-Wallberg et

90 al., 2014), and successful pregnancies have been reported after testosterone use (Light et al.,  
91 2014). Case reports have been published of subjects successfully undergoing IVF after  
92 temporarily discontinuing testosterone therapy for 1-12 months, and healthy live births were  
93 reported (Adeleye et al., 2019; Broughton and Omurtag, 2017; Leung et al., 2018). These data  
94 suggest that the follicular pool and oocyte quality are preserved.

95 A primary mouse model for HT in transgender males was recently published and found that  
96 ovaries from testosterone-treated mice were generally normal, with the exception of some cyst-  
97 like late antral follicles (Kinnear et al., 2019). The fertility potential in terms of ovarian response  
98 to gonadotropins, oocyte integrity, or fertilizability was not examined. There is very limited  
99 information about the necessity for cessation of testosterone therapy prior to ovarian  
100 stimulation, and no mouse models have addressed this problem. The aim of the present study  
101 was to establish a mouse model in which reproductive potential could be evaluated following  
102 prolonged HT in female mice with and without a period of testosterone cessation.

103

104 Materials and Methods

105 *Ethical approval*

106 Animal studies were performed in accordance with the Guide for the Care and Use of  
107 Laboratory Animals (National Academy of Sciences 1996) and were approved by the  
108 Institutional Animal Care & Use Committee at UConn Health (protocol number 101977-0122).

109

110 *Media and Reagents*

111 All chemicals were purchased from Millipore Sigma (St. Louis, MO, USA) unless otherwise  
112 indicated. Testosterone cypionate was from Steraloids (Newport, RI, USA) and was prepared  
113 as an 8 mg/ml solution in sesame oil. Equine chorionic gonadotropin (eCG) was from  
114 Calbiochem. The medium for oocyte collection was HEPES-buffered MEM $\alpha$  (Gibco 12000022,  
115 Thermo Fisher, Waltham, MA, USA) containing penicillin, streptomycin, and polyvinyl alcohol  
116 (PVA), and 10  $\mu$ M milrinone to prevent spontaneous meiotic maturation (Mehlmann et al.,  
117 2019). For overnight oocyte maturation, oocytes were washed into bicarbonate-buffered  
118 MEM $\alpha$  (Mehlmann et al., 2019) containing 5% fetal bovine serum (Invitrogen, Carlsbad, CA,  
119 USA) without milrinone. For in vitro fertilization, cumulus masses were collected in human tubal  
120 fluid medium (HTF; Cook Medical Inc. IVF medium (#K-RVFE; Fisher) containing reduced  
121 glutathione. Sperm were capacitated in IVF medium (Mehlmann and Kline, 1994) containing 15  
122 mg/ml Fraction V bovine serum albumin.

123

124 *Experimental design*

125 Six-week-old female CF-1 (Envigo, Indianapolis, IN, USA) and >8-week-old male CD-1 mice  
126 (Envigo) were used for all experiments. Three female mice were housed per cage in a  
127 temperature and light-controlled room on a 14L:10D light cycle. Male mice were housed  
128 individually.

129

130 Six-week-old female mice were lightly sedated with isoflurane and injected weekly,  
131 subcutaneously, with 400  $\mu$ g testosterone cypionate or vehicle using 27-gauge needles. In the  
132 first set of experiments, mice were sacrificed within 8 days after the 6<sup>th</sup> testosterone injection,  
133 when testosterone levels were high. These mice are referred to as the “active exposure” group.  
134 In the second set of experiments, mice were sacrificed 6-7 weeks after the 6<sup>th</sup> testosterone  
135 injection, when testosterone returned to basal levels. These mice are referred to as the  
136 “washout” group. Both groups were subdivided into 3 more groups: mice that were not  
137 stimulated with gonadotropins; mice that were stimulated with eCG only; and mice that were  
138 stimulated with eCG followed by hCG to induce ovulation.

139

140 For both the active exposure and washout groups, we performed vaginal smears to examine  
141 cyclicity. We analyzed the following: serum testosterone levels; serum estrogen levels; ovary  
142 weights and histology; oocyte number prior to and after priming with eCG or eCG + hCG;  
143 structure of the meiotic spindle; and egg fertilizability. Control mice were injected with sesame  
144 oil and were treated in parallel with the testosterone-injected groups. All mice were euthanized  
145 by isoflurane overdose followed by cervical dislocation.

146

#### 147 *Vaginal cytology*

148 For the active exposure group, daily vaginal smears were performed using standard methods  
149 (Goldman et al., 2007) starting in the 5<sup>th</sup> week of testosterone treatments. For the washout  
150 group, daily vaginal smears were done starting one week after the final testosterone injection.  
151 Staging of the estrous cycle was determined by the presence and distribution of leukocytes,  
152 cornified epithelial cells, and nucleated epithelial cells. Proestrus was identified by nucleated  
153 epithelium, estrus was identified by large cornified epithelial cells, metestrus was identified by



154 leukocytes and large cornified epithelial cells, and diestrus was identified by the predominance  
155 of leukocytes in the presence of nucleated and cornified cells (Gaytan et al., 2017). Clitoral size  
156 was visually assessed at the time of cytology.

#### 157 *Blood collection and hormone analysis*

158 After the mice were sacrificed, they were weighed and terminal blood was collected by cardiac  
159 puncture using a heparinized 18-gauge needle and syringe. Blood samples were kept on ice.  
160 Within 30 minutes of collection, samples were centrifuged at 4°C for 15 minutes (1000 x g) and  
161 supernatants were stored at -80°C. Diethyl ether extraction was performed as directed by  
162 Cayman Chemical, with extracted samples stored at -20°C in Cayman ELISA buffer.  
163 Testosterone and estradiol-17 $\beta$  analyses were performed using ELISA kits (Cayman Chemical,  
164 Ann Arbor, MI, USA) according to the manufacturer's instructions. For comparison, we also  
165 collected blood from mature male mice that were used for in vitro fertilization (see below).  
166 These males had been acclimated to the lab for at least one week prior to the experiment, were  
167 housed individually, and were not exposed to females prior to blood collection.

#### 168 *Ovarian histology*

169 Ovaries were collected and most of the fat and oviducts were removed by dissection under a  
170 stereoscope and were then weighed. Ovaries were fixed in 10% formalin for 24-48 hours,  
171 washed into PBS, then were dehydrated in ethanol, embedded in paraffin, and 5  $\mu$ m serial  
172 sections were cut and processed by the Histology Core at UConn Health. Sections were  
173 stained with hematoxylin and eosin.

174 Total numbers of antral follicles and corpora lutea were counted. Antral follicles were defined as  
175 being ~250-320  $\mu$ m in diameter with a clearly visible antral cavity and oocyte with two or more  
176 layers of granulosa cells. Preovulatory follicles were defined as being >320  $\mu$ m in diameter.  
177 Each antral follicle was counted only when the oocyte was present and while scanning between

178 adjacent sections to prevent duplicate counting. Corpora lutea were defined as discrete  
179 eosinophilic round structures. Corpora lutea were numbered as the sections were serially  
180 assessed through the entire ovary to prevent duplicate counting. Two of the investigators  
181 independently counted follicles.

#### 182 *Oocyte collection and immunofluorescence staining*

183 Ovaries from unstimulated and eCG-primed mice were weighed and one ovary from each  
184 mouse was fixed for histological analysis while the contralateral ovary was used for oocyte  
185 collection. The ovary for oocyte collection was placed in HEPES-buffered MEM $\alpha$  containing  
186 milrinone and punctured using a 30-gauge needle. Oocytes were collected with a mouth pipet  
187 and counted. For in vitro maturation, oocytes were washed into bicarbonate-buffered MEM $\alpha$   
188 without milrinone and were incubated overnight at 37°C in a humidified incubator containing 5%  
189 CO<sub>2</sub>/95% air. In vitro maturation was confirmed by the disappearance of the nuclear envelope  
190 and the formation of first polar bodies using a stereoscope. Oocytes were fixed for 30-60 min at  
191 37°C in 2% formaldehyde, 100 mM HEPES, 50 mM EGTA, 10 mM MgSO<sub>4</sub>, and 0.2% Triton X-  
192 100, then were permeabilized in PBS containing 0.1% Triton X-100, and blocked for at least 15  
193 minutes in PBS containing 3% BSA and 0.01% Triton X-100. Oocytes were incubated overnight  
194 at 4°C in primary antibody against tubulin (YL1/2; Serotec Inc., Raleigh, NC) diluted to 10  $\mu$ g/ml  
195 in blocking buffer. After washing in PBS-PVA, oocytes were incubated in Alexa488-conjugated  
196 secondary antibody for 1 hr at room temperature in the dark. Oocytes were washed in PBS-  
197 PVA containing 5  $\mu$ M SYTOX Orange (ThermoFisher) to label chromosomes. Imaging for  
198 spindle integrity was performed using a Zeiss Pascal confocal microscope with a 40X, 1.2 NA  
199 water immersion objective (C-Apochromat; Carl Zeiss MicroImaging, Inc., Thornwood, NY,  
200 USA).

201

202 *In vitro fertilization*

203 Female mice were superovulated with 5 IU eCG, followed 48 hrs later with 5 IU hCG.  
204 Approximately 13-15 hrs later, ovaries and oviducts were removed and cumulus masses  
205 obtained by puncturing the swollen ampullae. Cumulus masses were incubated in 200  $\mu$ l drops  
206 of HTF containing reduced glutathione for ~30 min prior to adding sperm. Sperm were collected  
207 from the epididymides of male mice by gently snipping with fine scissors into a 100  $\mu$ l drop of  
208 capacitation medium and were capacitated for 1-2 hrs before adding 3-5  $\mu$ l of the sperm  
209 suspension to the drops containing the eggs. The sperm and eggs were incubated together for  
210 4 hrs, then were washed into 200  $\mu$ l drops of HTF without glutathione. Fertilized eggs were  
211 incubated overnight in a humidified incubator containing 5% CO<sub>2</sub>/95% air. The next day, 2-cell  
212 embryos were counted.

213 *Statistical analysis*

214 Statistical analyses were performed using Prism 6.0 software for Windows, GraphPad Software,  
215 La Jolla, California ([www.graphpad.com](http://www.graphpad.com)). Specific statistical tests for each experiment are  
216 indicated in the figure legends.  $P < 0.05$  was considered to be significant.

217

218

219

220

221

222 Results

223

224 *Testosterone cypionate elevates serum testosterone levels and induces virilization in female*

225 *mice.*

226 In a recent study investigating the effects of testosterone on female mice, Kinnear et al. (2019)

227 injected testosterone enanthate twice weekly to maintain elevated testosterone levels. In the

228 current study, we injected a similar form of testosterone, testosterone cypionate (referred to

229 hereafter as “T”), which is commonly used by transgender men to elevate T levels (Luthy et al.,

230 2017; Moravek et al., 2020), weekly. T-injected mice showed signs of virilization, including

231 distinct clitoromegaly and cessation of estrous cycles (Fig. 1A). All control-injected mice clearly

232 cycled throughout the entire experiment, whereas all T-injected mice appeared to be in diestrus

233 (Fig.1B), which is consistent with what was observed previously (Kinnear et al., 2019). One

234 week after the 6<sup>th</sup> T injection (referred to herein as the “active exposure” group), mice were

235 sacrificed, trunk blood was collected, and T levels were measured. T-injected mice had

236 significantly higher T levels than controls, and the amount of T was comparable to the levels in

237 adult males (Fig. 2). In one set of experiments, we did not sacrifice females after the 6-week

238 injection period; rather, the mice were kept for several weeks after cessation of injections

239 (referred to herein as the “washout” group). T levels declined to baseline levels within 5 weeks

240 following the last injection (Fig. 2) and these “washout mice” resumed cycling, as assessed by

241 daily vaginal smears. Interestingly, clitoromegaly was no longer apparent in these washout

242 mice 5 weeks after the last injection (Fig. 1A). The weights of the mice did not differ between T-

243 treated and controls. T-treated and control mice in the active exposure group weighed  $30.5 \pm$

244  $0.8$  g (SEM) vs  $31 \pm 1$  g, respectively, whereas in the washout group T-treated and control mice

245 weighed  $33.9 \pm 1$  and  $33.7 \pm 0.8$  g, respectively.

246

247 *Ovaries from T-treated mice are smaller than control ovaries but contain normal complements of*  
248 *follicles and respond to stimulation by gonadotropins.*

249

250 Currently, little is known about the effects of T treatment on the ability of ovaries to respond to  
251 gonadotropic stimulation. To investigate this, both the active exposure and washout groups of  
252 mice were divided into 3 sub-groups: 1) not stimulated by gonadotropins; 2) stimulated with  
253 eCG only; and 3) stimulated with eCG and hCG to induce ovulation. For groups 1 and 2,  
254 ovaries were collected after euthanasia, most of the fat and oviducts were removed under a  
255 stereoscope, one ovary was fixed and processed for histological analysis, and oocytes were  
256 collected from the other ovary. For group 3, ovulated eggs were collected from both oviducts  
257 prior to weighing ovaries.

258

259 Ovaries from T-treated mice in the active exposure group weighed significantly less than control  
260 ovaries whether or not they were stimulated with gonadotropins (Fig. 3A). Notably, the lower  
261 ovarian weights were still apparent in the washout group, which more closely mimics the  
262 standard of care for T-treated transgender males who wish to obtain functional eggs (Fig. 3B).

263

264 Histological analysis of unstimulated, eCG-stimulated, and ovulated ovaries from the active  
265 exposure groups (approximately 12 weeks in age) showed similar follicle morphology and  
266 comparable numbers of follicles from T-treated mice with their respective controls, despite the  
267 overall smaller size of ovaries in T-treated mice (Fig. 4). Because the numbers of preantral and  
268 primary follicles have already been reported to be the same for control and T-treated ovaries  
269 (Kinnear et al., 2019), we focused on counting antral follicles of various sizes. We analyzed  
270 follicles in detail from 3 mice per group, one ovary from each mouse. In the unstimulated group,  
271 T-treated and control ovaries contained similar numbers of antral follicles, as well as similar  
272 numbers of atretic follicles. Most of the atretic follicles were in the 250-320  $\mu\text{m}$  size range, while

273 there were almost no atretic follicles in the preovulatory size range. The major difference  
274 between T-treated, unstimulated ovaries and control ovaries was a significantly lower number of  
275 corpora lutea (CLs) in the T-treated group compared with controls (Fig. 4). The eCG-stimulated  
276 ovaries contained significantly more preovulatory follicles than the unstimulated ovaries in both  
277 control and T-treated mice and contained 0-1 atretic preovulatory follicles. Similar to  
278 unstimulated ovaries, ovaries from T-treated mice contained fewer CLs than controls. Most of  
279 the CLs present in the T-treated ovaries were likely to be from cycles that occurred prior to T  
280 treatment, as they were eosinophilic rather than basophilic (Gaytan et al., 2017) and, in general,  
281 located deep within the ovary rather than at the periphery (Fig. 4). The one exception was a T-  
282 treated mouse that ovulated in response to the eCG injection; this mouse contained mostly  
283 basophilic CLs (Fig. 4A). We did not evaluate ovulated ovaries in detail with histology.

284 Measurements of estradiol-17 $\beta$  (E2) levels from trunk blood obtained at the time of sacrifice  
285 provided further evidence that T-stimulated ovaries responded to gonadotropins: E2 was low in  
286 the unstimulated groups, increased in response to eCG injection, then fell back to basal levels  
287 after ovulation (Fig. 5). E2 levels in T-treated mice in both the active exposure group and the  
288 washout group were lower than respective controls in response to eCG stimulation, and E2  
289 levels in the eCG-stimulated mice from the washout group were ~3X higher than in the active  
290 exposure group (Fig. 5), though the basal levels in the unstimulated and ovulated groups were  
291 similar to those in the active exposure group.

292

293 *T-treated mice contain comparable numbers of meiotically competent oocytes and ovulate*  
294 *similar numbers of fertilizable, mature eggs as controls.*

295

296 To examine if the follicles from T-treated mice contain normal oocytes, we first collected  
297 immature oocytes from ovaries of unstimulated and eCG-stimulated mice, and then collected

298 ovulated eggs from the groups that were injected with both eCG and hCG. In the active  
299 exposure group, we recovered significantly more immature oocytes from the T-exposed ovaries  
300 than from their respective controls (Fig. 6A). In the washout group, we obtained similar  
301 numbers of immature oocytes from T-treated and control ovaries, though statistical analysis was  
302 not possible in this group due to the small sample size (n=2; Fig. 6B). Both active exposure and  
303 washout groups contained similar numbers of ovulated eggs for T-treated and control mice (Fig.  
304 6A,B). Immature oocytes from T-treated ovaries (active exposure and washout groups)  
305 underwent germinal vesicle breakdown (GVBD), extruded first polar bodies, and formed  
306 morphologically normal meiotic spindles in culture (Fig. 6C,D). The proportion of oocytes with  
307 intact spindle structure vs poor spindle structure - characterized by degeneration or misaligned  
308 chromosomes - was similar between the groups (Fig. 6D). The diameters of in vitro matured  
309 eggs from the active exposure T group were the same as controls (Fig. 6E).

310 We tested the fertilizability of ovulated eggs using in vitro fertilization by evaluating the number  
311 of 2-cell embryos that were observed 24 hrs after insemination. Overall, cleavage to the 2-cell  
312 stage was comparable between T-treated and control mice, and was similar to percentages of  
313 fertilized eggs obtained from the washout group (Fig. 7).

314

315 Discussion

316

317 Transgender men who have been undergoing testosterone therapy and who wish to obtain eggs  
318 for fertilization or freezing are generally stimulated with gonadotropins. This is usually done  
319 following a period of T cessation that is sufficient for the menstrual cycle to resume (Adeleye et  
320 al., 2019; Broughton and Omurtag, 2017; Leung et al., 2018). There is strong evidence that  
321 transgender men who have taken T can produce viable, developmentally competent eggs after  
322 discontinuing its use (Adeleye et al., 2019; Broughton and Omurtag, 2017; Leung et al., 2018;  
323 Light et al., 2014), but to date, there are no publications regarding the quality and  
324 developmental capacity of eggs retrieved from transgender men who remain on HT. Here, we  
325 show that treating female mice with T cypionate weekly for 6 weeks does not impair the  
326 fertilizability of their eggs, and our results suggest that T treatment does not need to stop before  
327 gonadotropic stimulation.

328

329 T cypionate elevated blood T levels to those found in male mice, stopped the estrous cycle, and  
330 caused significant clitoral growth, changes that are commonly observed in transgender males  
331 on HT (Unger, 2016). It was noteworthy that the clitoromegaly did not persist in the washout  
332 group, which was surprising because it is generally recognized that this is a permanent change  
333 in human females exposed to high levels of T (Cabrera and Rogol, 2013; Sielert et al., 2013). It  
334 is possible that the regression of clitoromegaly upon T withdrawal in our mice represents a  
335 difference between mice and humans; however, careful measurements using a larger sample  
336 size would need to be done to determine this definitively.

337

338 T-treated mice had smaller ovaries than controls, which is likely due to the greatly reduced  
339 number of CLs in these mice. A recent study reported a complete absence of CLs in T-treated  
340 female mice (Kinnear et al., 2019). The finding that our T-treated mice had CLs at all was



341 unexpected, as we used a concentration of T cypionate that was similar to the mid-range  
342 effective dose used by Kinnear et al. In general, the eosinophilic staining of CLs we observed in  
343 T-treated mice was consistent with residual rather than freshly ovulated CLs (Gaytan et al.,  
344 2017) and there were considerably fewer CLs in our T-treated mice than in controls, suggesting  
345 that the estrous cycle was indeed inhibited in our mice, as was also shown by vaginal cytology.  
346 Smaller ovaries were also apparent in T-treated mice in the washout group, which likewise  
347 contained significantly fewer CLs than controls, suggesting that these mice had only recently  
348 begun cycling prior to ovary harvest and therefore had many fewer ovulations than controls.

349  
350 Although they weighed less than controls, the ovaries from T-treated mice contained a  
351 complement of histologically normal antral follicles that were similar to controls. Unlike the  
352 study by Kinnear et al. (2019), who reported a higher incidence of late-stage atretic, cyst-like  
353 follicles, we only observed a single preovulatory atretic follicle in 3/6 ovaries examined, which  
354 was not significantly different from controls. Rather, the majority of atretic antral follicles we  
355 observed came from follicles that were in the ~250-320  $\mu\text{m}$  diameter size range, not yet  
356 preovulatory, and the percentages were not different between control and T-treated ovaries. T-  
357 treated ovaries that were stimulated by eCG had more preovulatory follicles than unstimulated  
358 ovaries, and these numbers were comparable to the number of preovulatory follicles observed  
359 in control mice. One of the T-treated mice unexpectedly ovulated in response to eCG  
360 stimulation. There is evidence that T induces the expression of FSH receptors in granulosa  
361 cells (Garcia-Velasco et al., 2012; Liu et al., 2015; Sen et al., 2014), and if this occurred in our  
362 mice, then it is possible that the T-treated follicles were sensitized to eCG such that  
363 spontaneous ovulation occurred prior to the administration of hCG.

364  
365 T-treated mice responded to eCG treatment by producing E2. Interestingly, T-treated mice in  
366 the active exposure group did not elevate E2 to the same extent as controls. The difference in

367 E2 levels after eCG was surprising because a similar number of oocytes were collected after  
368 stimulation. In human IVF cycles, the peak E2 level achieved directly correlates with the  
369 number of oocytes collected at the time of retrieval (Chenette et al., 1990), and during reported  
370 IVF cycles in transgender males, the peak E2 levels, as well as the number of oocytes  
371 collected, have been reported to be similar to female controls, although higher doses of  
372 gonadotropins were used for transgender males (Leung et al., 2018). Lower E2 levels here may  
373 reflect the lower number of CLs in the T group. Though it is thought that CLs are rapidly  
374 inactivated after each cycle in mice (Accialini et al., 2017), it is possible that the residual CLs  
375 retain some ability to produce E2 in response to eCG.

376

377 Ovaries from T-treated mice produced meiotically competent oocytes. Oocytes retrieved from  
378 unstimulated and eCG-stimulated, T-treated ovaries were able to mature to the metaphase II  
379 stage in culture, forming morphologically normal meiotic spindles. This is consistent with a  
380 descriptive study of human oocytes collected from the ovarian cortex of HT-exposed  
381 transgender males, in which oocyte meiotic spindle structure after in vitro maturation was found  
382 to be normal (Lierman et al., 2017). In addition, T-treated mice in both the active exposure and  
383 washout groups ovulated similar numbers of eggs in response to eCG and hCG injection as  
384 controls. These eggs fertilized to the same extent as controls and cleaved to the 2-cell stage.  
385 One exception in the active exposure group was a single T-treated mouse that only produced 3  
386 poor-quality eggs, none of which fertilized. One hypothesis is that this mouse ovulated  
387 prematurely, as there was some histological evidence in a different T-treated mouse of  
388 premature ovulation after eCG. There was insufficient data to fully explore this isolated  
389 scenario, and the other T-treated mice produced fertilizable eggs.

390

391 In conclusion, we provide evidence showing that female mice produce normal, fertilizable eggs  
392 after testosterone exposure, whether T levels are low after a washout period or high during  
393 active exposure. One limitation in our study could be that we only exposed mice to T for 6  
394 weeks. While this length of exposure was sufficient to produce phenotypes characteristic of  
395 human transgender males exposed to T, it may not completely mimic the human situation, in  
396 which many transgender males seeking fertility treatment have been on HT for several  
397 years. Further studies that expose mice to T for longer periods of time would help confirm that  
398 its effects are not detrimental to the reproductive process. Despite this concern, our results  
399 provide promising data that could help influence the treatment options for transgender men  
400 seeking fertility treatment. If testosterone has no detrimental impact on ovarian function,  
401 transgender males will have greater flexibility in making reproductive decisions. It is important  
402 to note, however, that if a transgender male plans to become pregnant by spontaneous  
403 pregnancy or use of assisted reproductive technology, testosterone must be discontinued due to  
404 its teratogenic effects (De Roo et al., 2016). Our study suggests that the current practice of T  
405 cessation prior to ovarian stimulation and surgical oocyte retrieval may not be necessary when  
406 the transgender male does not plan to carry the pregnancy at that time, and could potentially  
407 help serve as the basis for human trials to examine this current clinical practice.

#### 408 Authors' Roles

409 C.B.B. designed the study, acquired and interpreted the data, and helped draft the article.  
410 T.F.U. contributed to the study design, data acquisition, and article review. L.L. contributed to  
411 data acquisition and article review. L.M.M. designed the study, contributed to data acquisition  
412 and interpretation, and helped draft the article.

413

414

415 Acknowledgements

416 The authors thank Dr. Daniel Grow, M.D. and director of the Center for Advanced Reproductive  
417 Services Fellowship Program at UConn Health; and Drs. Laurinda Jaffe, Ph.D., Bruce White,  
418 Ph. D, and John Nulsen, M.D. for support and helpful advice, discussions, and suggestions on  
419 the manuscript.

420 Funding

421 This study was funded by the Reproductive Endocrinology and Infertility fellowship program  
422 through UConn Health Graduate Medical Education (to C.B.B.).

423 Conflict of interest

424 The authors have no competing interests.

425

426

427 References

- 428 Accialini P, Hernandez S, Abramovich D, Tesone M. The Rodent Corpus Luteum. In Meidan R  
429 (ed) *The Life Cycle of the Corpus Luteum*. 2017 Springer International Publishing, New  
430 York, NY, pp 117-131.
- 431 Adeleye AJ, Cedars MI, Smith J, Mok-Lin E. Ovarian stimulation for fertility preservation or  
432 family building in a cohort of transgender men. *J Assist Reprod Genet* 2019;**36**: 2155-2161.
- 433 Armuand G, Dhejne C, Olofsson JI, Rodriguez-Wallberg KA. Transgender men's experiences of  
434 fertility preservation: a qualitative study. *Hum Reprod* 2017;**32**: 383-390.
- 435 Broughton D, Omurtag K. Care of the transgender or gender-nonconforming patient undergoing  
436 in vitro fertilization. *Int. J Transgenderism* 2017;**18**: 372-375.
- 437 Cabrera SM, Rogol AD. Testosterone exposure in childhood: discerning pathology from  
438 physiology. *Expert Opin Drug Saf* 2013;**12**: 375-388.
- 439 Chenette PE, Sauer MV, Paulson RJ. Very high serum estradiol levels are not detrimental to  
440 clinical outcome of in vitro fertilization. *Fertil Steril* 1990;**54**: 858-863.
- 441 De Roo C, Tilleman K, T'Sjoen G, De Sutter P. Fertility options in transgender people. *Int Rev*  
442 *Psych* 2016;**28**: 112-119.
- 443 De Roo C, Tilleman K, Vercruyssen C, Declercq H, T'Sjoen G, Weyers S, De Sutter P. Texture  
444 profile analysis reveals a stiffer ovarian cortex after testosterone therapy: a pilot study. *J*  
445 *Assist Reprod Genet* 2019;**36**: 1837-1843.
- 446 Flores AR, Herman, J.L., Gates, G.J., Brown, T.N.T. How many adults identify as transgender in  
447 the United States? *Los Angeles, CA: The Williams Institute* 2016.
- 448 Garcia-Velasco JA, Rodriguez S, Agudo D, Pacheco A, Schneider J, Pellicer A. FSH receptor in  
449 vitro modulation by testosterone and hCG in human luteinized granulosa cells. *Eur J Obstet*  
450 *Gynecol Reprod Biol* 2012;**165**: 259-264.

- 451 Gaytan F, Morales C, Leon S, Heras V, Barroso A, Avendano MS, Vazquez MJ, Castellano JM,  
452 Roa J, Tena-Sempere M. Development and validation of a method for precise dating of  
453 female puberty in laboratory rodents: The puberty ovarian maturation score (Pub-Score).  
454 *Sci Rep* 2017;**7**: 46381.
- 455 Goldman JM, Murr AS, Cooper RL. The rodent estrous cycle: characterization of vaginal  
456 cytology and its utility in toxicological studies. *Birth Defects Res B Dev Reprod Toxicol*  
457 2007;**80**: 84-97.
- 458 Hembree WC, Cohen-Kettenis PT, Gooren L, Hannema SE, Meyer WJ, Murad MH, Rosenthal  
459 SM, Safer JD, Tangpricha V, T'Sjoen GG. Endocrine Treatment of Gender-  
460 Dysphoric/Gender-Incongruent Persons: An Endocrine Society Clinical Practice Guideline.  
461 *J Clin Endocrinol Metab* 2017;**102**: 3869-3903.
- 462 Ikeda K, Baba T, Noguchi H, Nagasawa K, Endo T, Kiya T, Saito T. Excessive androgen  
463 exposure in female-to-male transsexual persons of reproductive age induces hyperplasia of  
464 the ovarian cortex and stroma but not polycystic ovary morphology. *Hum Reprod* 2013;**28**:  
465 453-461.
- 466 Insogna IG, Ginsburg E, Srouji S. Fertility Preservation for Adolescent Transgender Male  
467 Patients: A Case Series. *J Adolesc Health* 2020.
- 468 Kinnear HM, Constance ES, David A, Marsh EE, Padmanabhan V, Shikanov A, Moravek MB. A  
469 mouse model to investigate the impact of testosterone therapy on reproduction in  
470 transgender men. *Hum Reprod* 2019;**34**: 2009-2017.
- 471 Leung A, Sakkas D, Pang S, Thornton K, Resetkova N. ART outcomes in female to male  
472 transgender patients: a new frontier in reproductive medicine. *Fert Steril* 2018;**109**: e35.
- 473 Lierman S, Tilleman K, Braeckmans K, Peynshaert K, Weyers S, T'Sjoen G, De Sutter P.  
474 Fertility preservation for trans men: frozen-thawed in vitro matured oocytes collected at the  
475 time of ovarian tissue processing exhibit normal meiotic spindles. *J Assist Reprod Genet*  
476 2017;**34**: 1449-1456.

- 477 Light AD, Obedin-Maliver J, Sevelius JM, Kerns JL. Transgender men who experienced  
478 pregnancy after female-to-male gender transitioning. *Obstet Gynecol* 2014;**124**: 1120-1127.
- 479 Liu T, Cui YQ, Zhao H, Liu HB, Zhao SD, Gao Y, Mu XL, Gao F, Chen ZJ. High levels of  
480 testosterone inhibit ovarian follicle development by repressing the FSH signaling pathway. *J*  
481 *Huazhong Univ Sci Technolog Med Sci* 2015;**35**: 723-729.
- 482 Luthy K, Williams C, Freeborn D, Cook A. Comparison of testosterone replacement therapy  
483 medications in the treatment of hypogonadism. *J Nurse Pract* 2017;**13**: 241-249.
- 484 Mehlmann LM, Kline D. Regulation of intracellular calcium in the mouse egg: calcium release in  
485 response to sperm or inositol trisphosphate is enhanced after meiotic maturation. *Biol*  
486 *Reprod* 1994;**51**: 1088-1098.
- 487 Mehlmann LM, Uliasz T, Lowther KM. SNAP23 is required for constitutive and regulated  
488 exocytosis in mouse oocytes. *Biol Reprod* 2019;**101**: 338-346.
- 489 Meyer WJ. World professional association for transgender health's standards of care  
490 requirements of hormone therapy for adults with gender identity disorder. *Int J*  
491 *Transgenderism* 2009;**11**: 127-132.
- 492 Moravek MB. Fertility preservation options for transgender and gender-nonconforming  
493 individuals. *Curr Opin Obstet Gynecol* 2019;**31**: 170-176.
- 494 Moravek MB, Kinnear HM, George J, Batchelor J, Shikanov A, Padmanabhan V, Randolph JF.  
495 Impact of Exogenous Testosterone on Reproduction in Transgender Men. *Endocrinology*  
496 2020;**161**.
- 497 Nahata L, Chen D, Moravek MB, Quinn GP, Sutter ME, Taylor J, Tishelman AC, Gomez-Lobo  
498 V. Understudied and Under-Reported: Fertility Issues in Transgender Youth-A Narrative  
499 Review. *J Pediatr* 2019;**205**: 265-271.
- 500 Neblett MF, 2nd, Hipp HS. Fertility Considerations in Transgender Persons. *Endocrinol Metab*  
501 *Clin North Am* 2019;**48**: 391-402.

502 Quinn VP, Nash R, Hunkeler E, Contreras R, Cromwell L, Becerra-Culqui TA, Getahun D,  
503 Giammattei S, Lash TL, Millman A *et al.* Cohort profile: Study of Transition, Outcomes and  
504 Gender (STRONG) to assess health status of transgender people. *BMJ Open* 2017;**7**:  
505 e018121.

506 Rodriguez-Wallberg KA, Dhejne C, Stefenson M, Degerblad M, Olofsson JI. Preserving eggs for  
507 men's fertility. a pilot experience with fertility preservation for female-to-male transsexuals in  
508 Sweden. *Fert Steril* 2014;**102**: e160-e161.

509 Sen A, Prizant H, Light A, Biswas A, Hayes E, Lee HJ, Barad D, Gleicher N, Hammes SR.  
510 Androgens regulate ovarian follicular development by increasing follicle stimulating  
511 hormone receptor and microRNA-125b expression. *Proc Natl Acad Sci U S A* 2014;**111**:  
512 3008-3013.

513 Sielert L, Liu C, Nagarathinam R, Craig LB. Androgen-producing steroid cell ovarian tumor in a  
514 young woman and subsequent spontaneous pregnancy. *J Assist Reprod Genet* 2013;**30**:  
515 1157-1160.

516 Unger CA. Hormone therapy for transgender patients. *Transl Androl Urol* 2016;**5**: 877-884.

517 Van Den Broecke R, Van Der Elst J, Liu J, Hovatta O, Dhont M. The female-to-male transsexual  
518 patient: a source of human ovarian cortical tissue for experimental use. *Hum Reprod*  
519 2001;**16**: 145-147.

520 Wierckx K, Van Caenegem E, Pennings G, Elaut E, Dedecker D, Van de Peer F, Weyers S, De  
521 Sutter P, T'Sjoen G. Reproductive wish in transsexual men. *Hum Reprod* 2012;**27**: 483-  
522 487.



Figure legends.

523 Figure 1. T treatment induces virilization in female mice. A) Clitoromegaly was apparent in the  
524 active exposure group (a=control; b=T-treated), but was no longer apparent in the washout  
525 group (c=control; d=T-treated). B) Vaginal smears from a cycling, control mouse (a-e) and a T-  
526 treated mouse (f-j). Smears were obtained during the fifth week of T injections. Shown here is  
527 5 sequential days of a representative control and T-injected mouse. a=diestrus; b=diestrus into  
528 proestrus; c=proestrus; d=estrus; e=metestrus from a control mouse. f-j = T-injected mouse in  
529 diestrus.

530 Figure 2. Testosterone cypionate transiently elevates T levels to those of untreated adult  
531 males. T levels were significantly higher in the active exposure mice, which were tested  
532 following the 6<sup>th</sup> T injection. T levels declined to baseline levels by 5 weeks after the last  
533 injection. Different letters above the bars indicate statistical significance;  $P < 0.0001$ , as  
534 determined by one-way ANOVA.

535

536 Figure 3. Ovaries from T-treated mice weigh less than control ovaries. A) Ovary weights from  
537 mice in the active exposure group. B) Ovary weights from mice in the washout group. Bars with  
538 different letters are significantly different ( $P < 0.05$ ), as determined using 2-way ANOVA followed  
539 by Bonferroni's multiple comparison test.

540

541 Figure 4. Ovaries from T-treated mice have normal complements of antral follicles but fewer  
542 corpora lutea. A) Histology sections showing representative images through ovaries from  
543 unstimulated and eCG-stimulated control and T-treated mice from the active exposure group  
544 using 2X, 4X, or 10X objectives. C=control; T=testosterone; \* = corpus luteum. The bottommost  
545 image is from a T-treated mouse that ovulated in response to eCG stimulation, showing fresh  
546 CLs (f\*) and residual CLs (r\*).

547 stimulated control and T-treated mice. “Small antral” follicles measured ~250-320  $\mu\text{m}$  in  
548 diameter; “preovulatory” follicles measured  $>320 \mu\text{m}$  in diameter. \*\*  $P<0.01$  (unpaired t-test); \*\*\*  
549  $P<0.0001$  (unpaired t-test). The increase in preovulatory follicles from eCG-stimulated ovaries  
550 compared to unstimulated ovaries is significant ( $P<0.05$ ; 2-way ANOVA followed by Bonferroni’s  
551 multiple comparison test). Data are mean  $\pm$  SEM.

552  
553 Figure 5. eCG stimulates E2 production in control and T-treated mice in both the active  
554 exposure and washout groups. Bars with different letters are significantly different ( $P<0.05$ ; 2-  
555 way ANOVA, Bonferroni’s multiple comparison post-test). Data are mean  $\pm$  SEM.

556  
557 Figure 6. T-treated mice produce meiotically competent oocytes and ovulate comparable  
558 numbers of eggs as controls. A,B) Numbers of oocytes and ovulated eggs recovered per ovary  
559 in the active exposure (A) and washout group (B). Bars are mean  $\pm$  SEM;  $P<0.05$  was  
560 considered significant, as determined by two-way ANOVA followed by Bonferroni’s multiple  
561 comparison test. C) Representative meiotic spindles from in vitro matured, eCG-stimulated  
562 ovaries from the active exposure group. Green = tubulin; Red = DNA. D) Percentage of eggs  
563 that formed normal meiotic spindles following in vitro maturation. Bars are mean  $\pm$  SEM.  
564 Numbers over each bar are the total number of in vitro matured eggs. AE = active exposure;  
565 WO = washout. E) Diameters of in vitro matured eggs in control vs. T-treated mice.

566  
567 Figure 7. Eggs from T-treated mice are fertilizable. Completed fertilization rates, defined as the  
568 number of 2-cell embryos per the number of inseminated eggs, in control vs. T-treated mice in  
569 both active exposure (A) and washout (B) groups. Each dot represents a single mouse.  
570 Horizontal bars are the mean and the vertical bars are  $\pm$  SEM.

**A**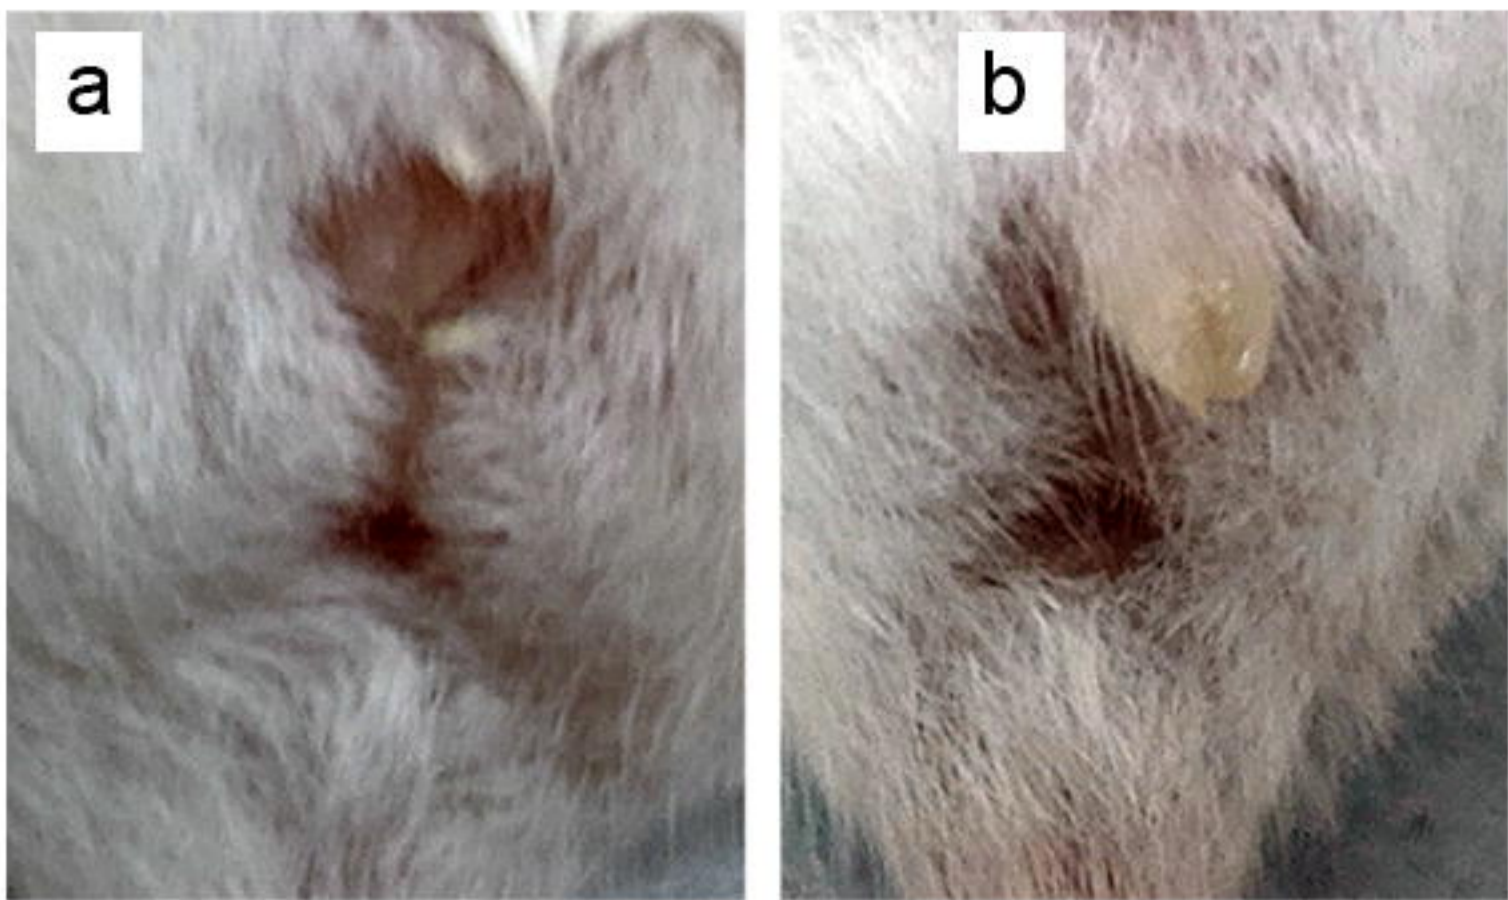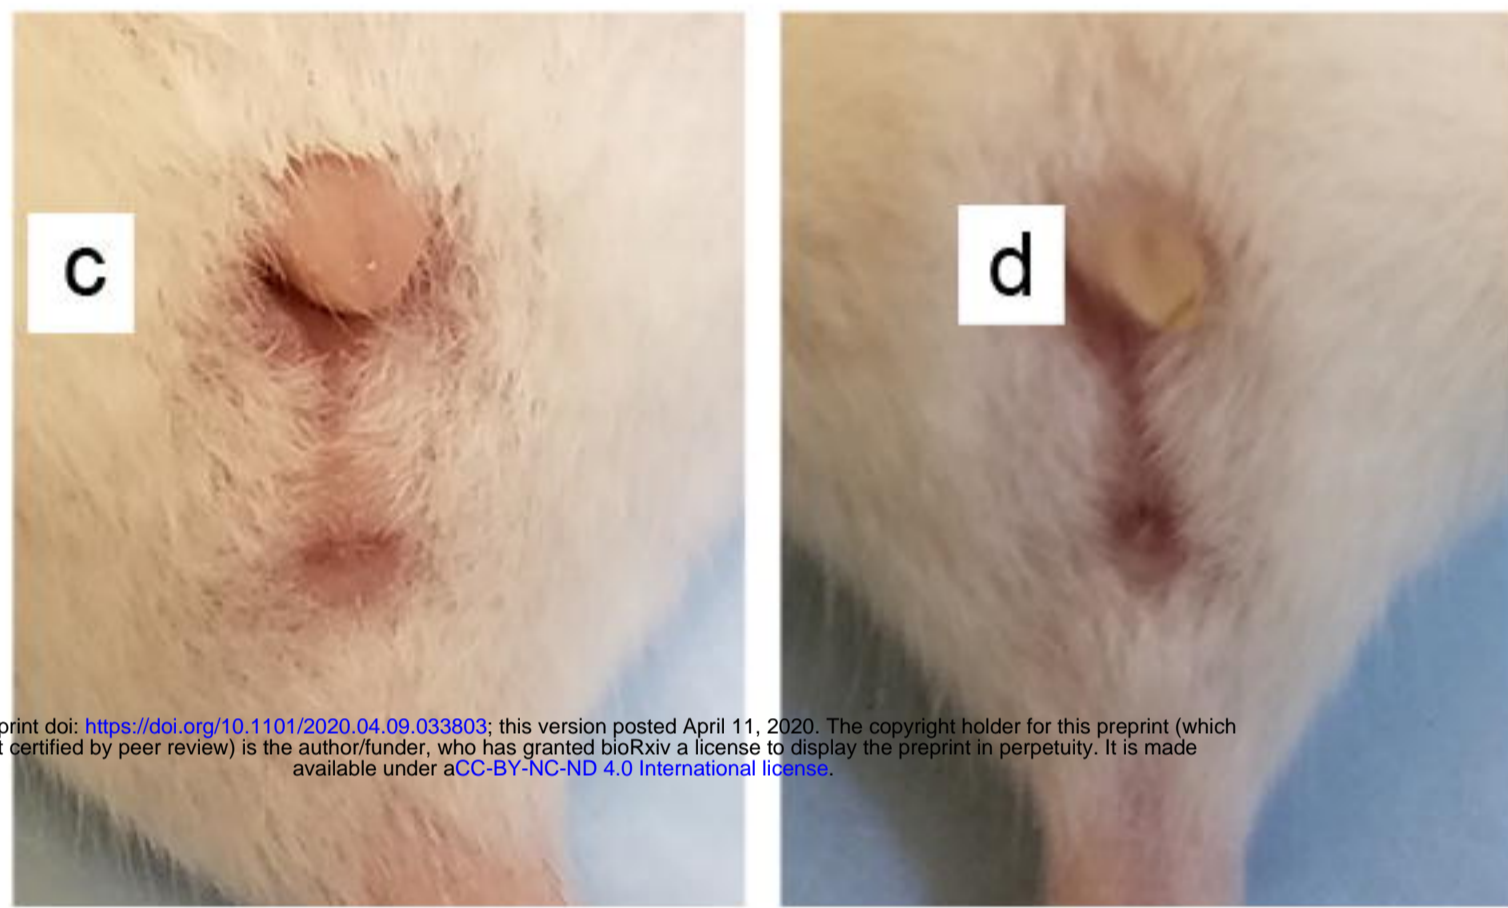

bioRxiv preprint doi: <https://doi.org/10.1101/2020.04.09.033803>; this version posted April 11, 2020. The copyright holder for this preprint (which was not certified by peer review) is the author/funder, who has granted bioRxiv a license to display the preprint in perpetuity. It is made available under aCC-BY-NC-ND 4.0 International license.

**B**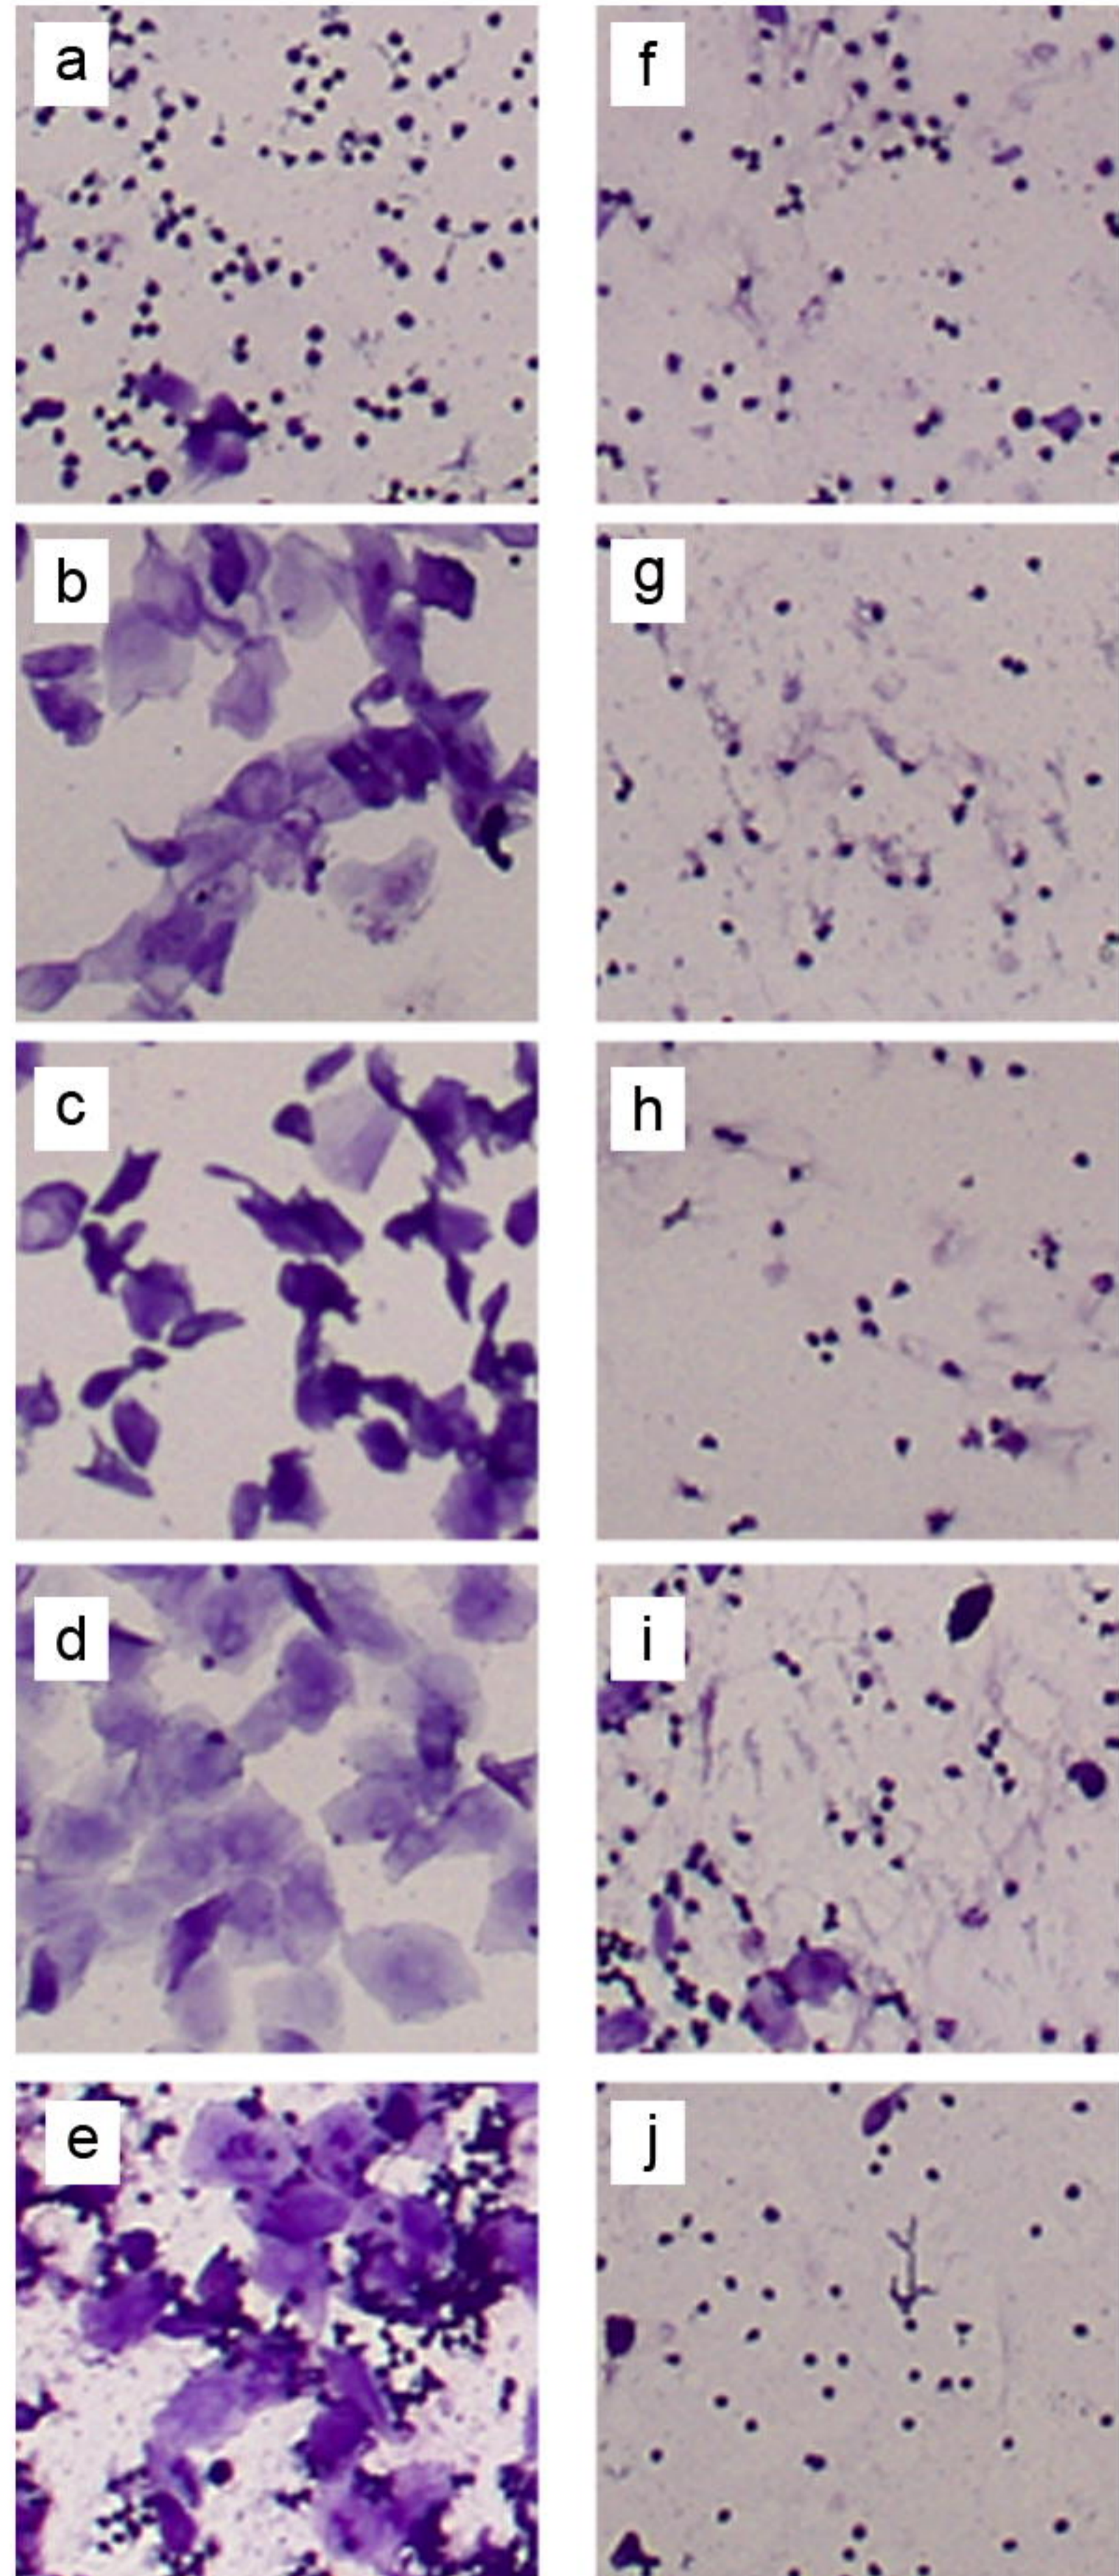

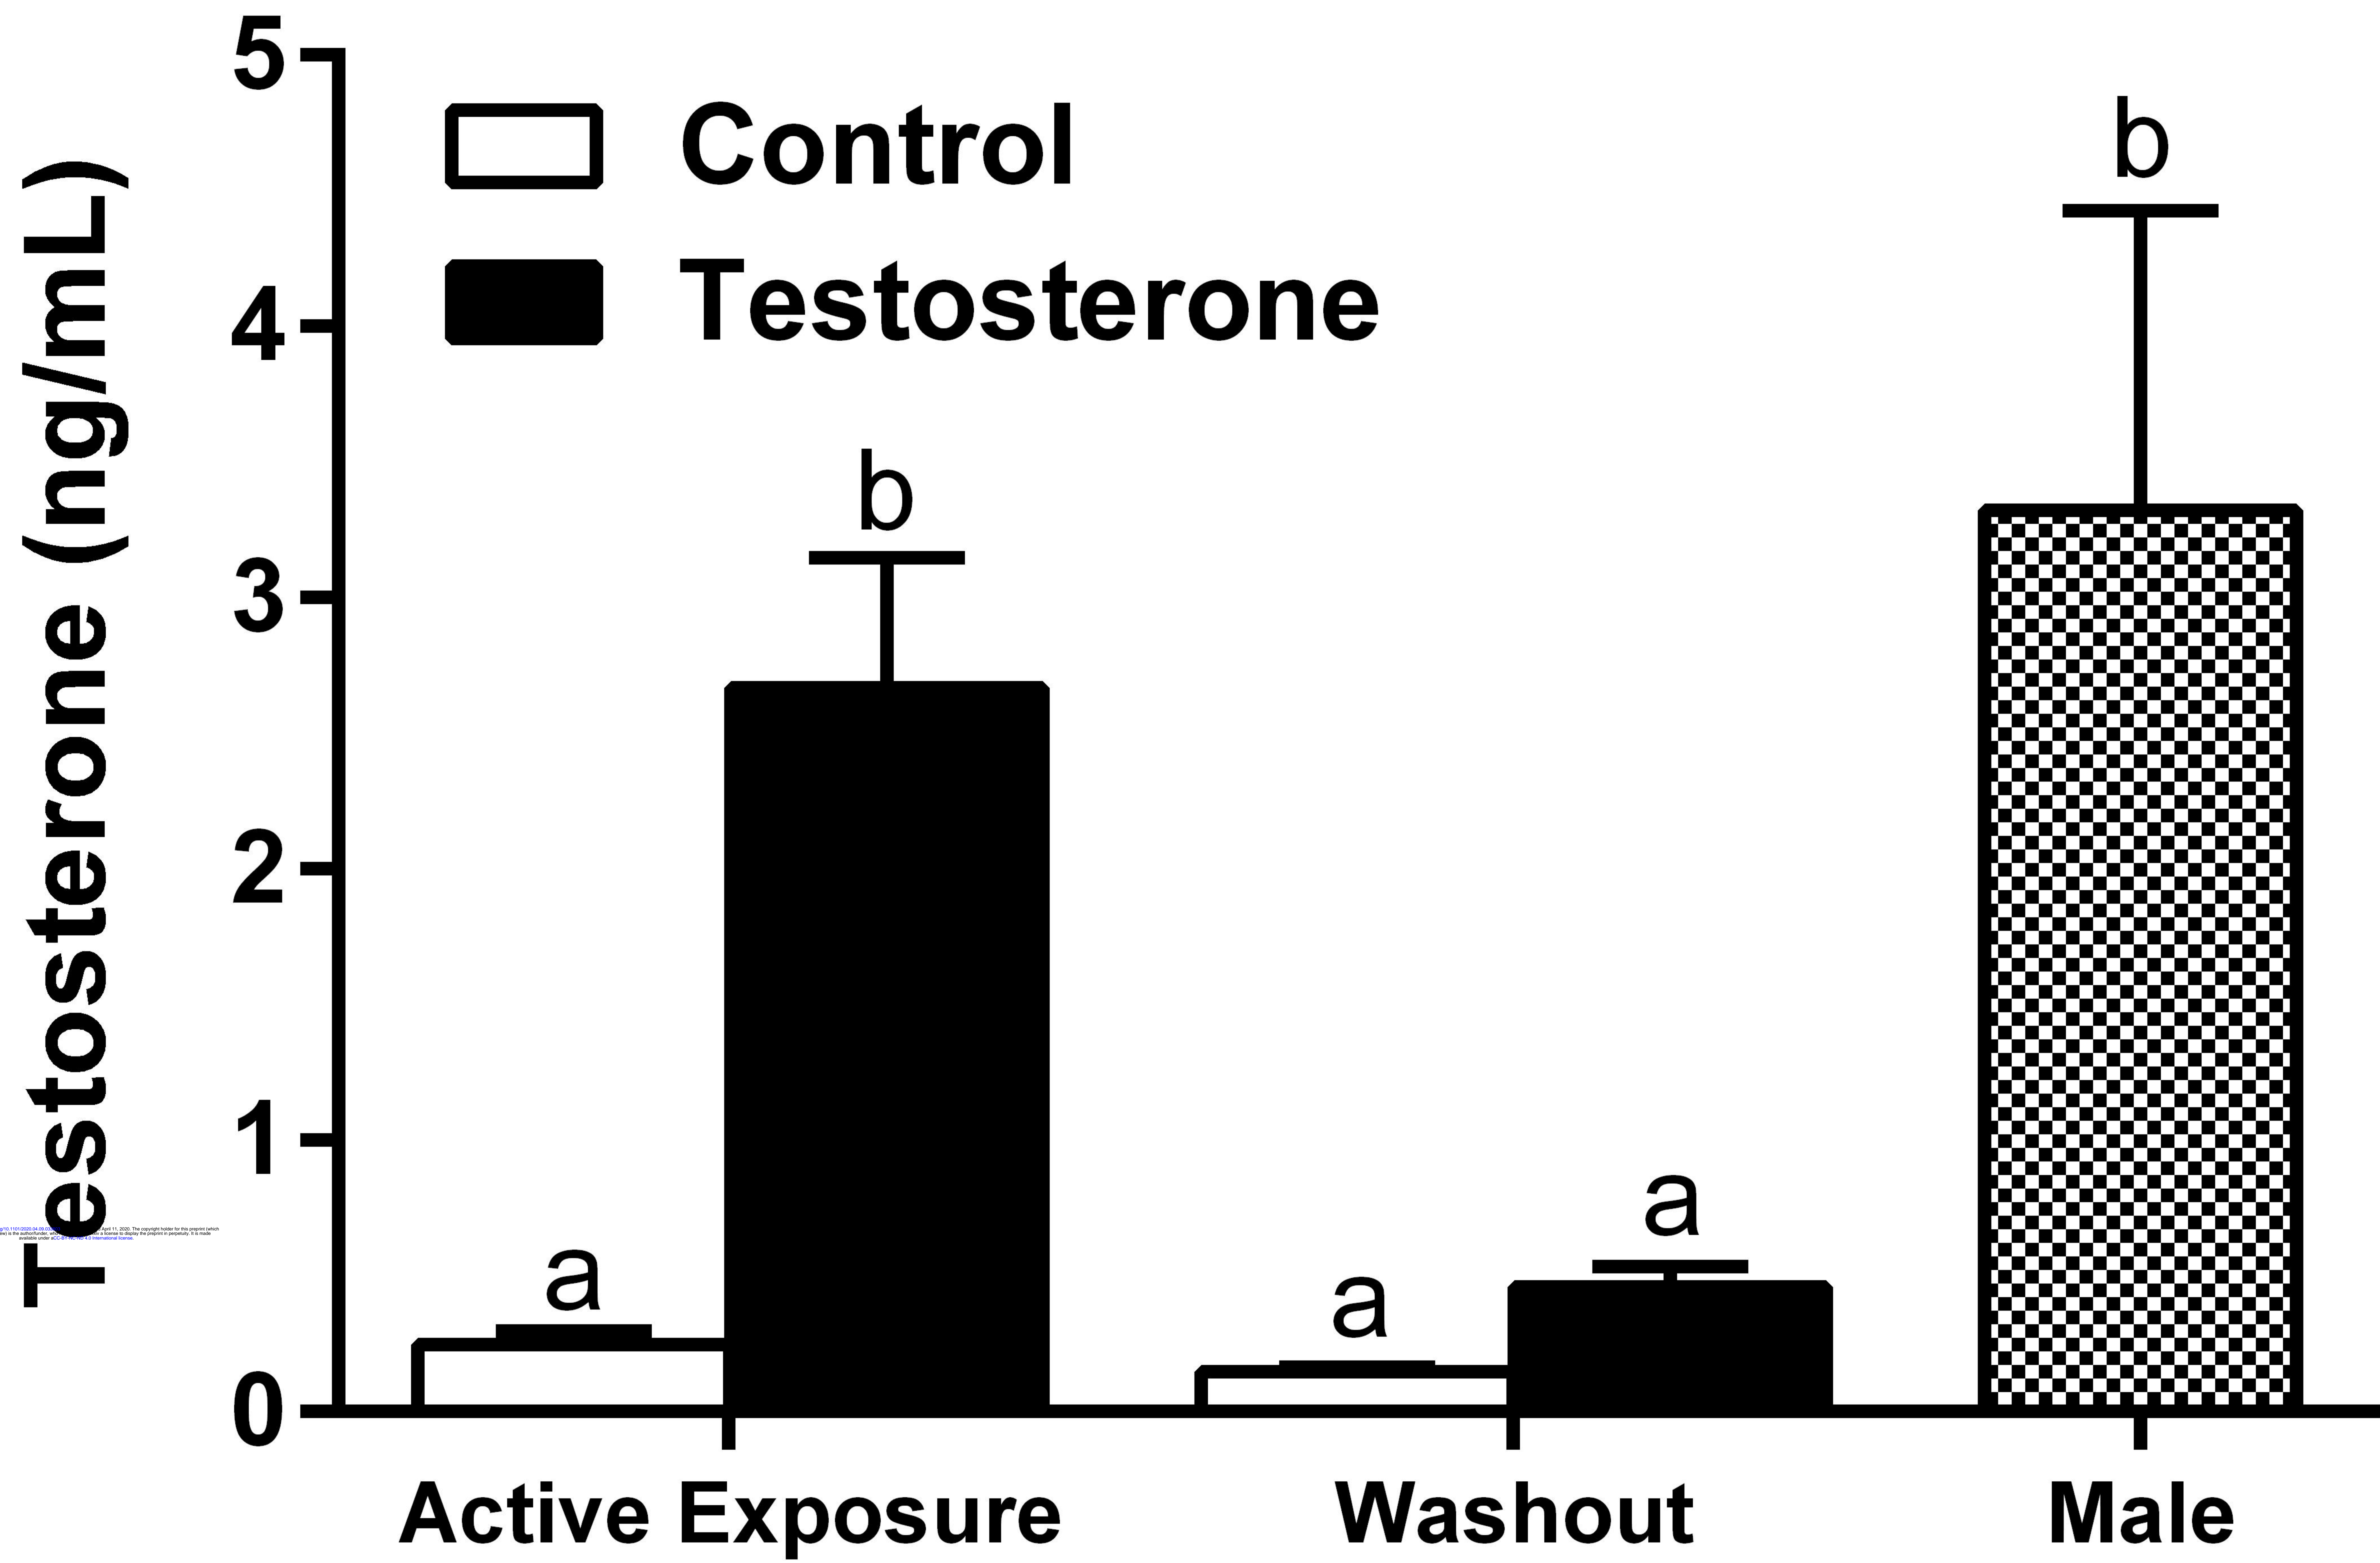

**A**

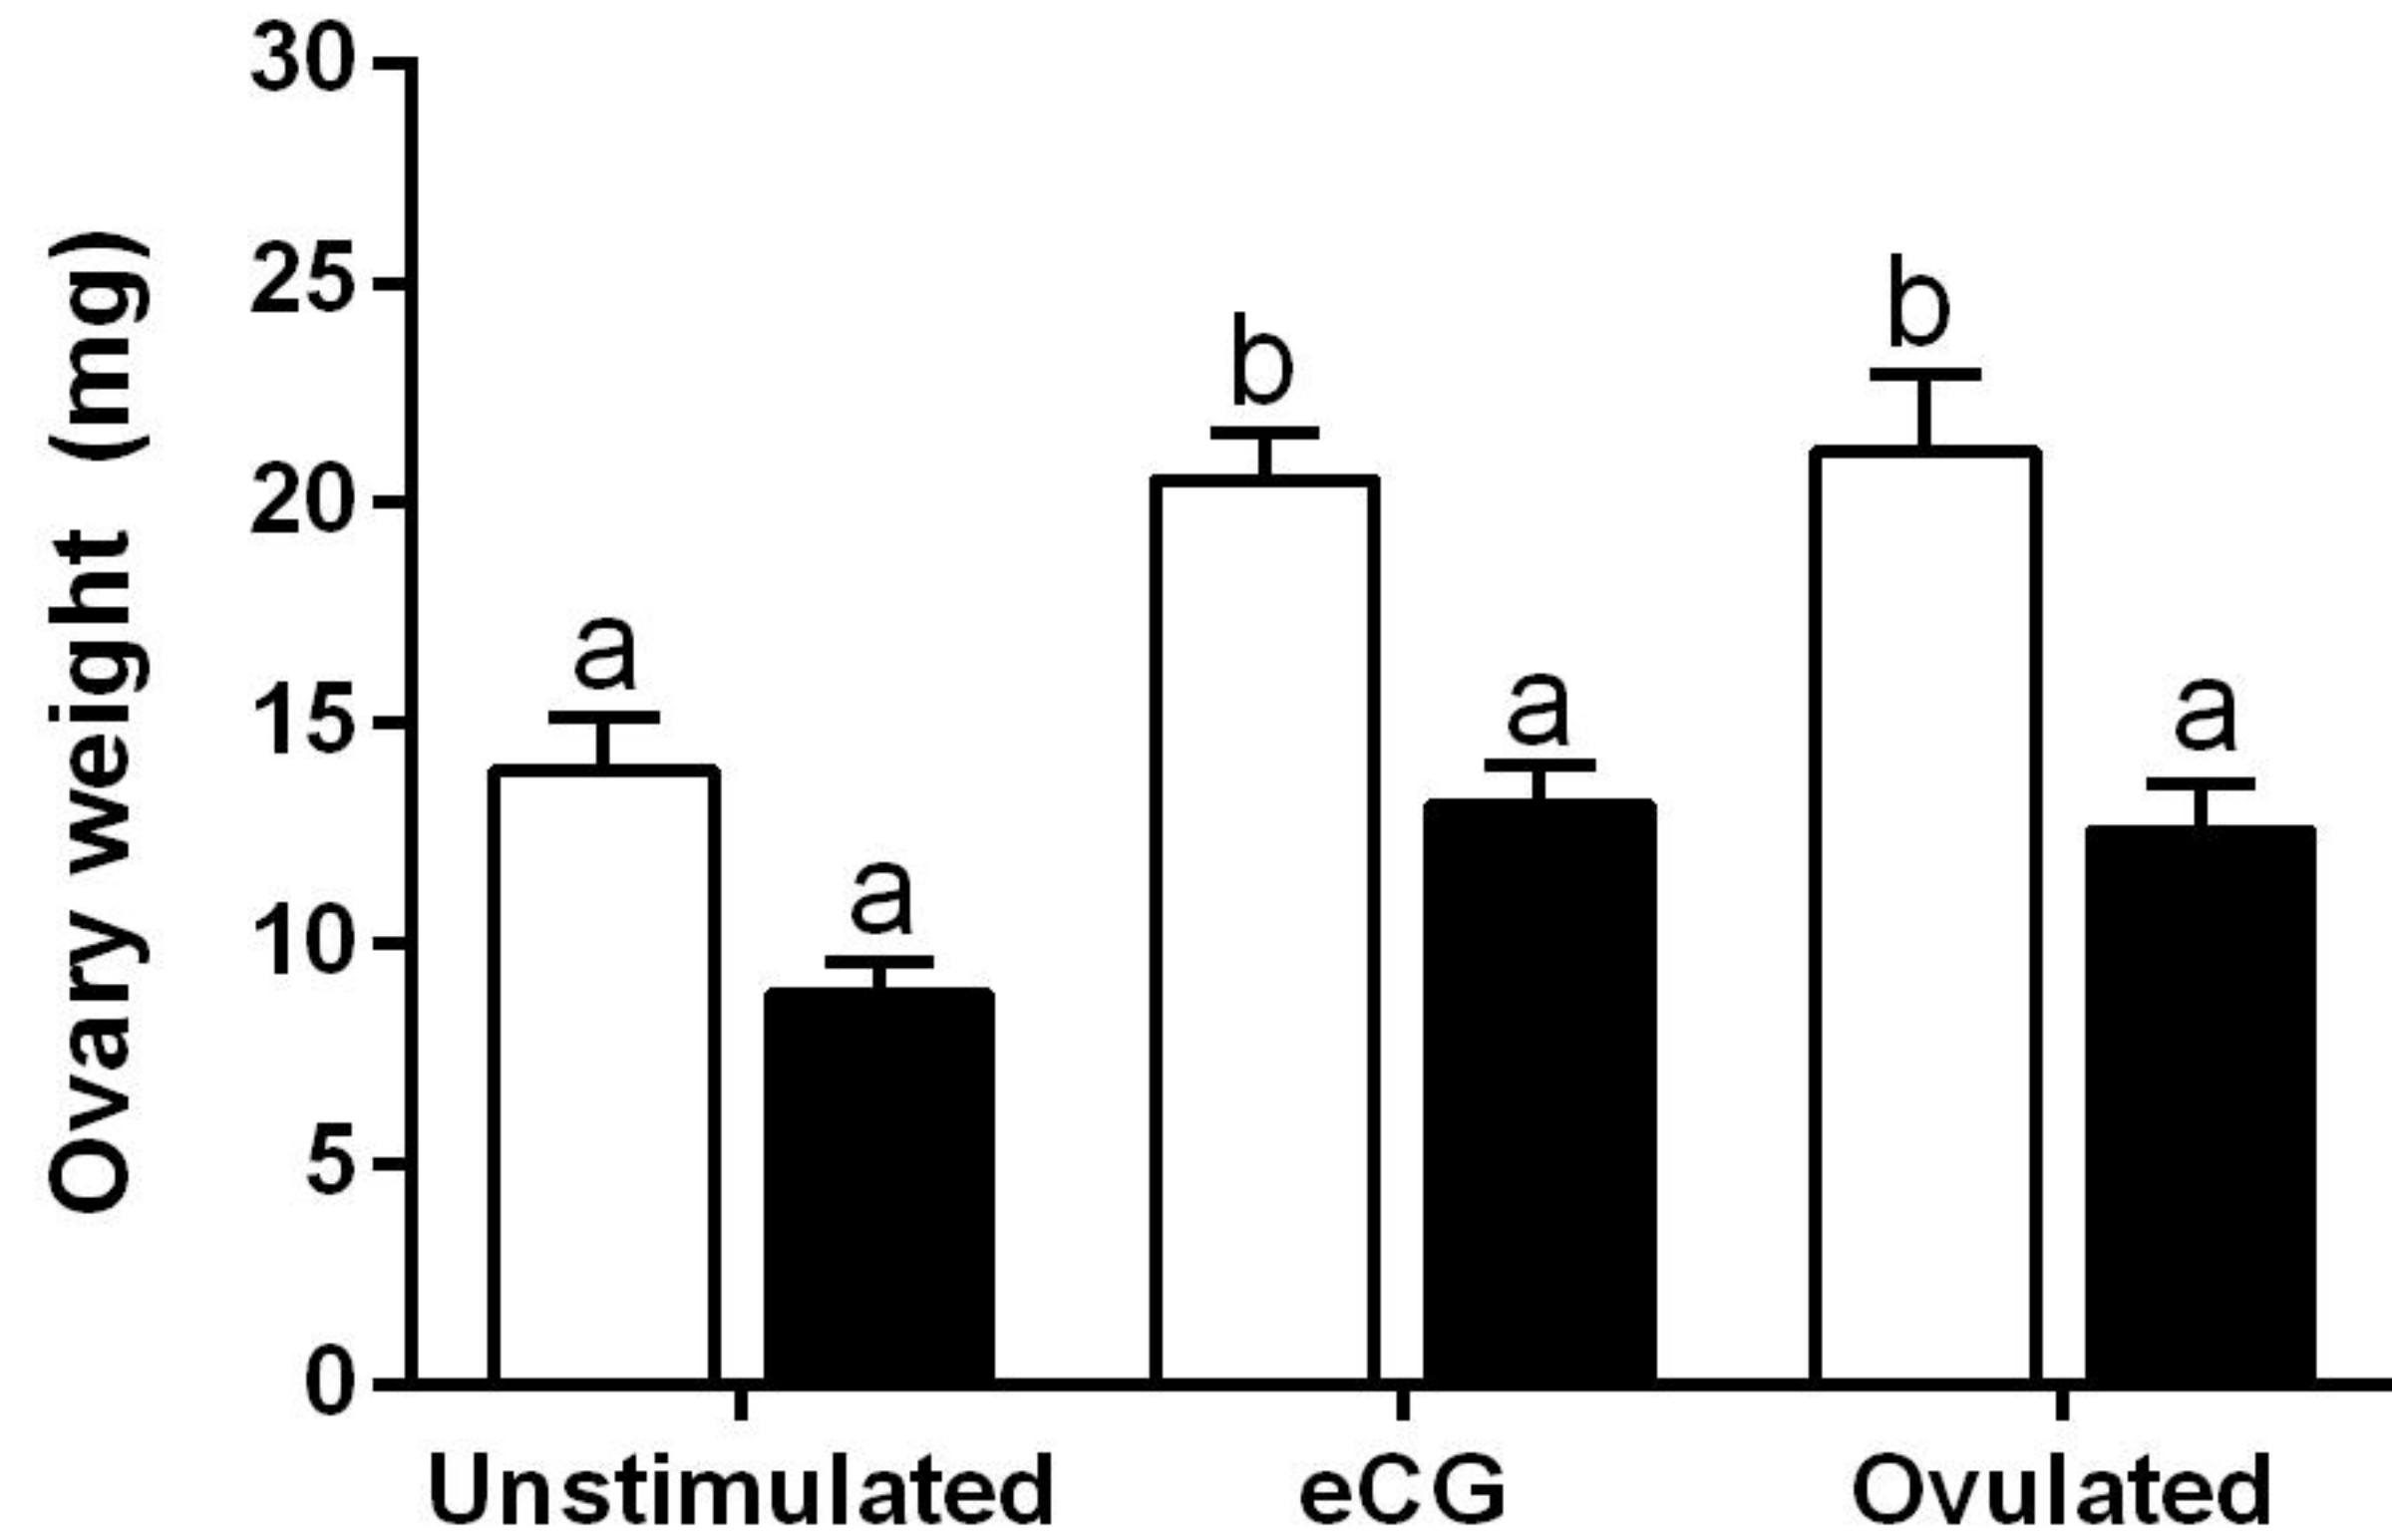

**B**

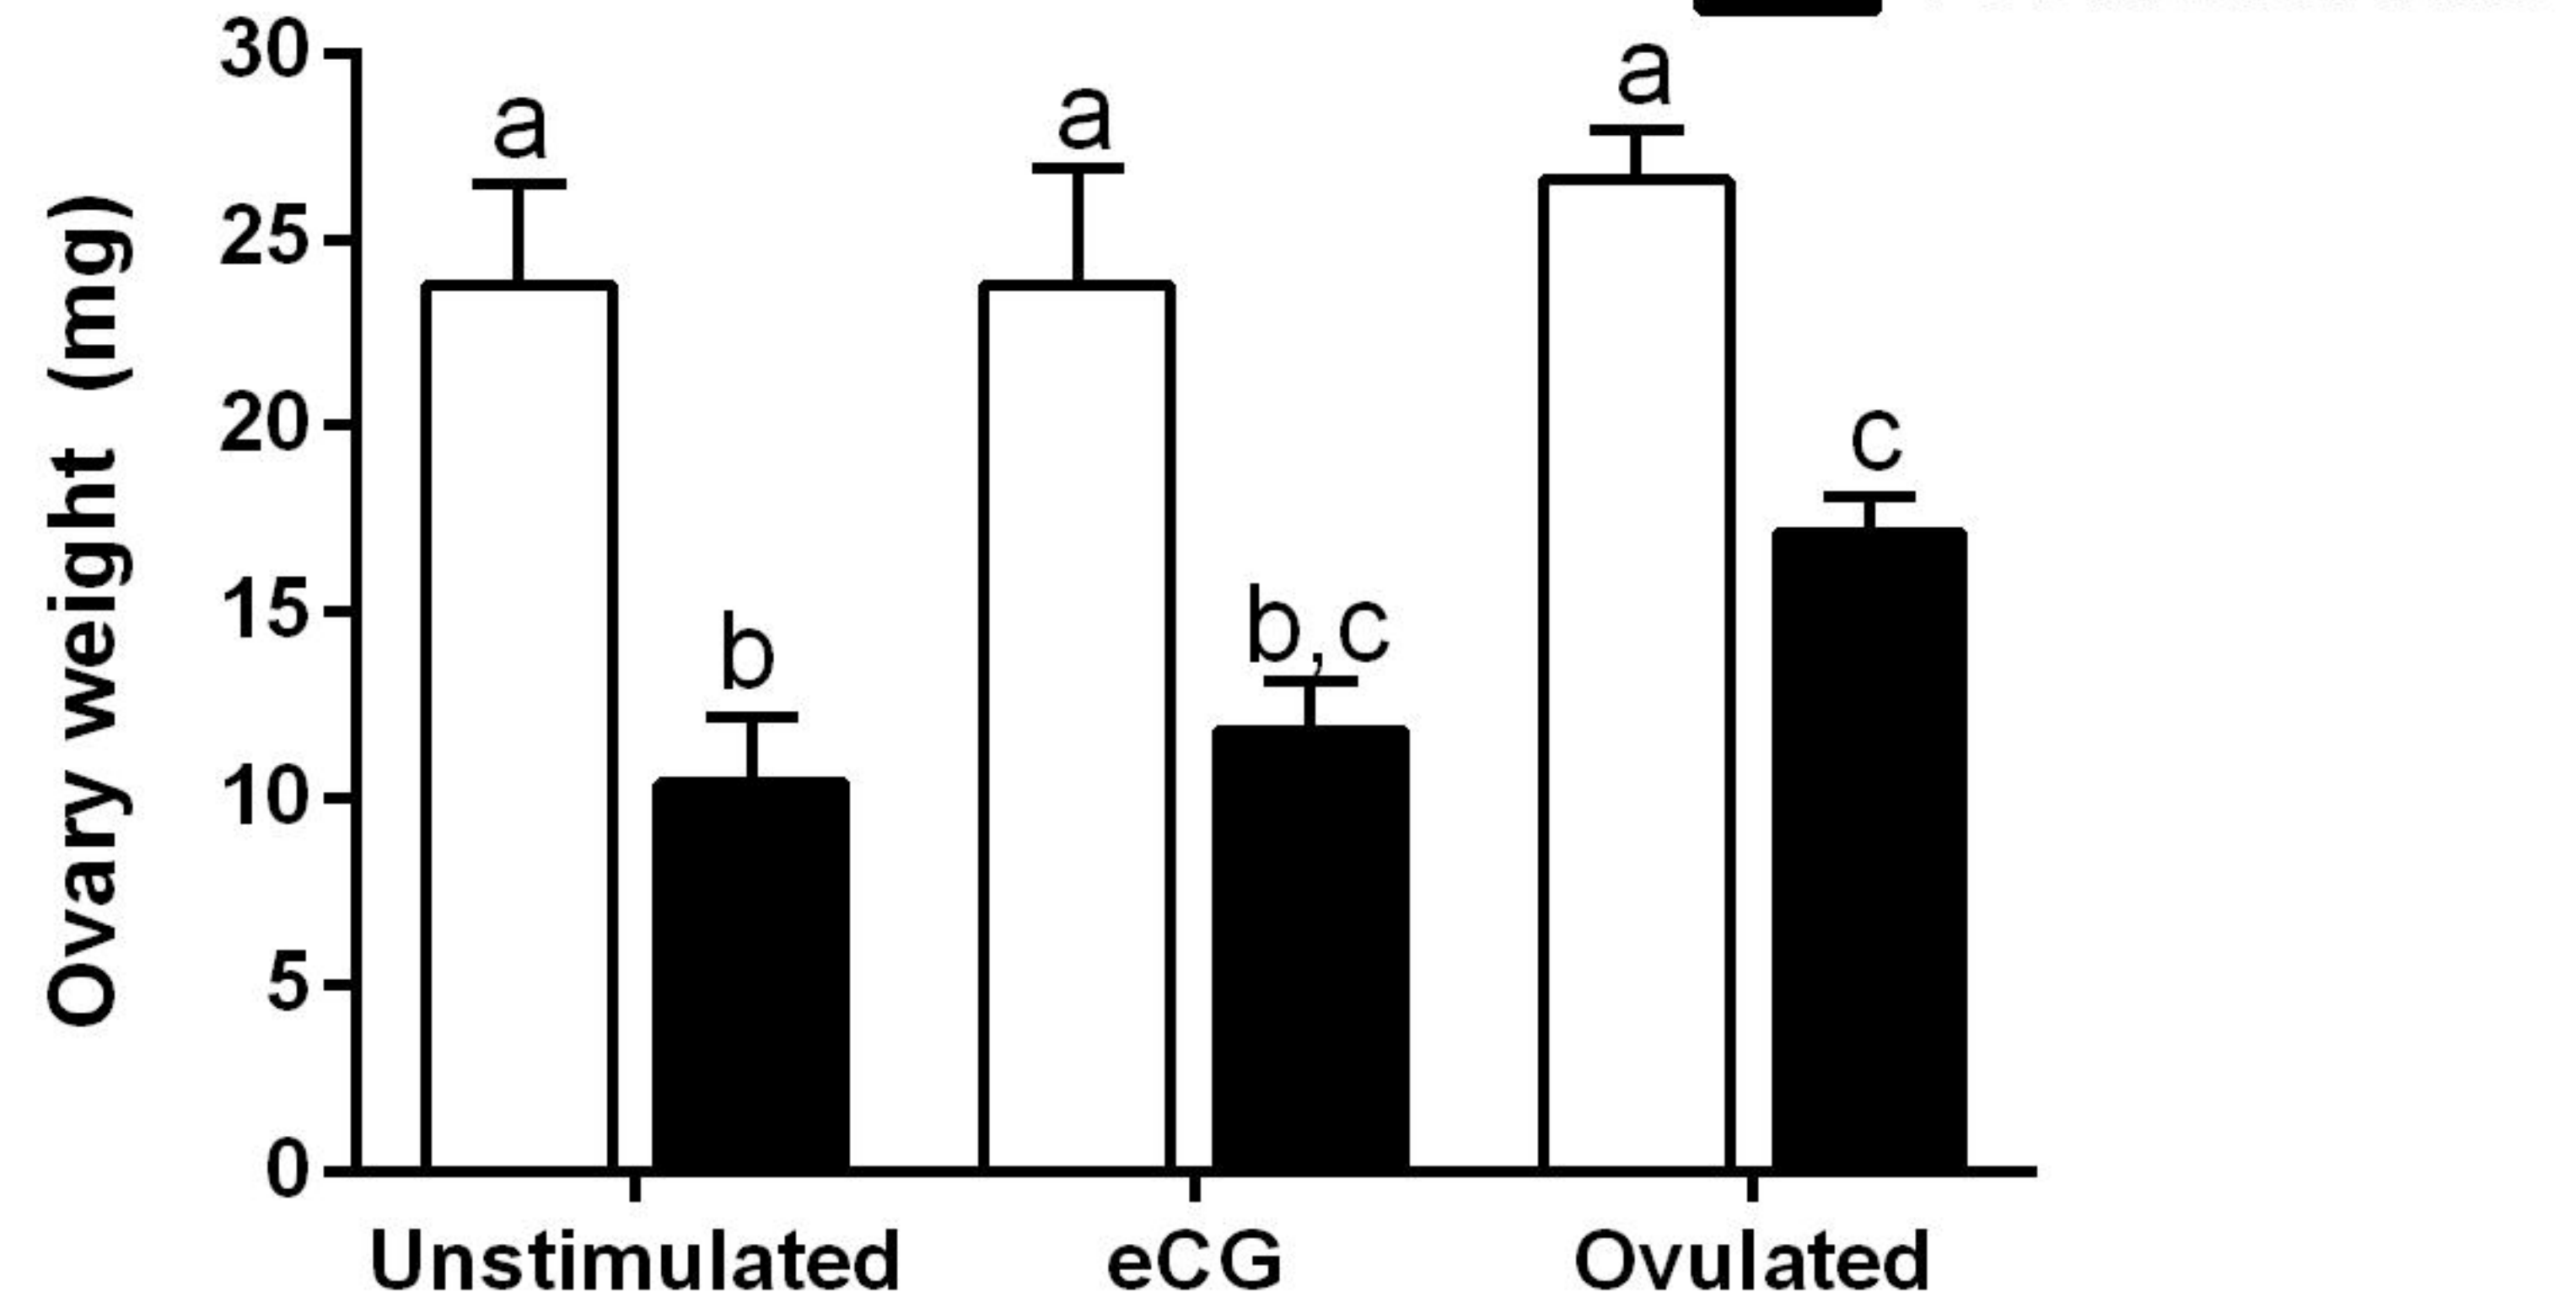

Control

Testosterone

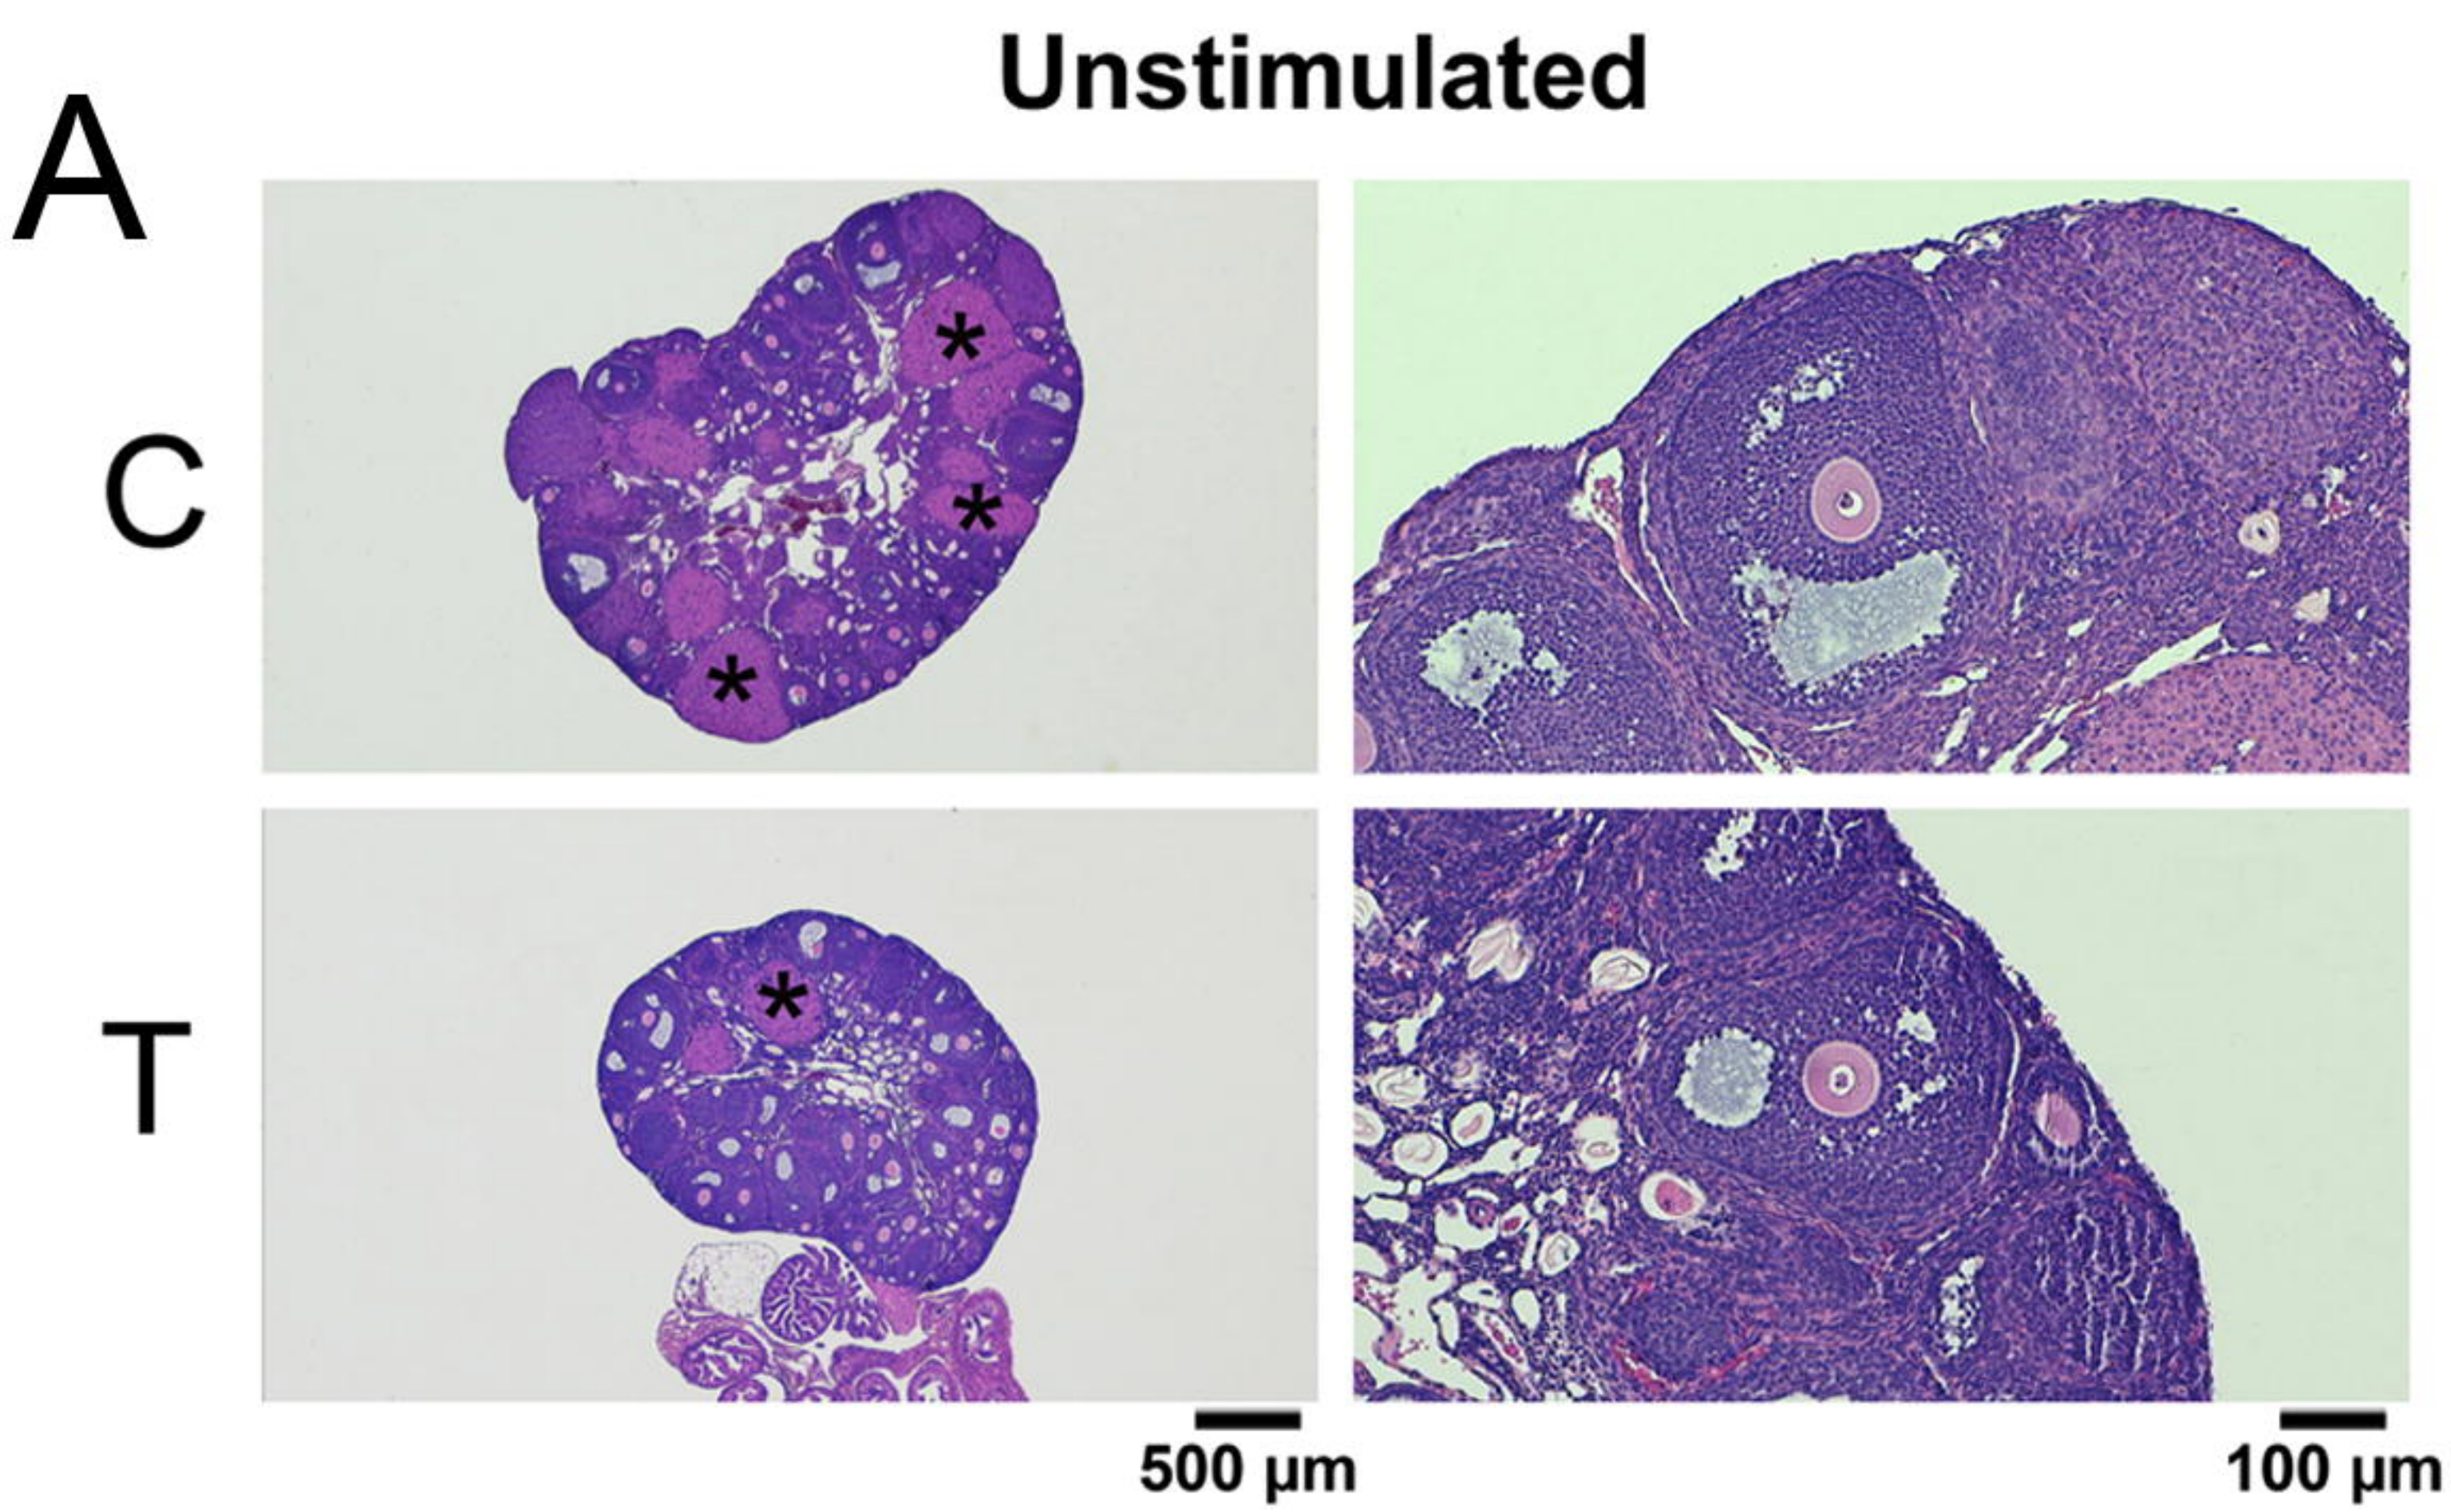

**eCG-Stimulated**

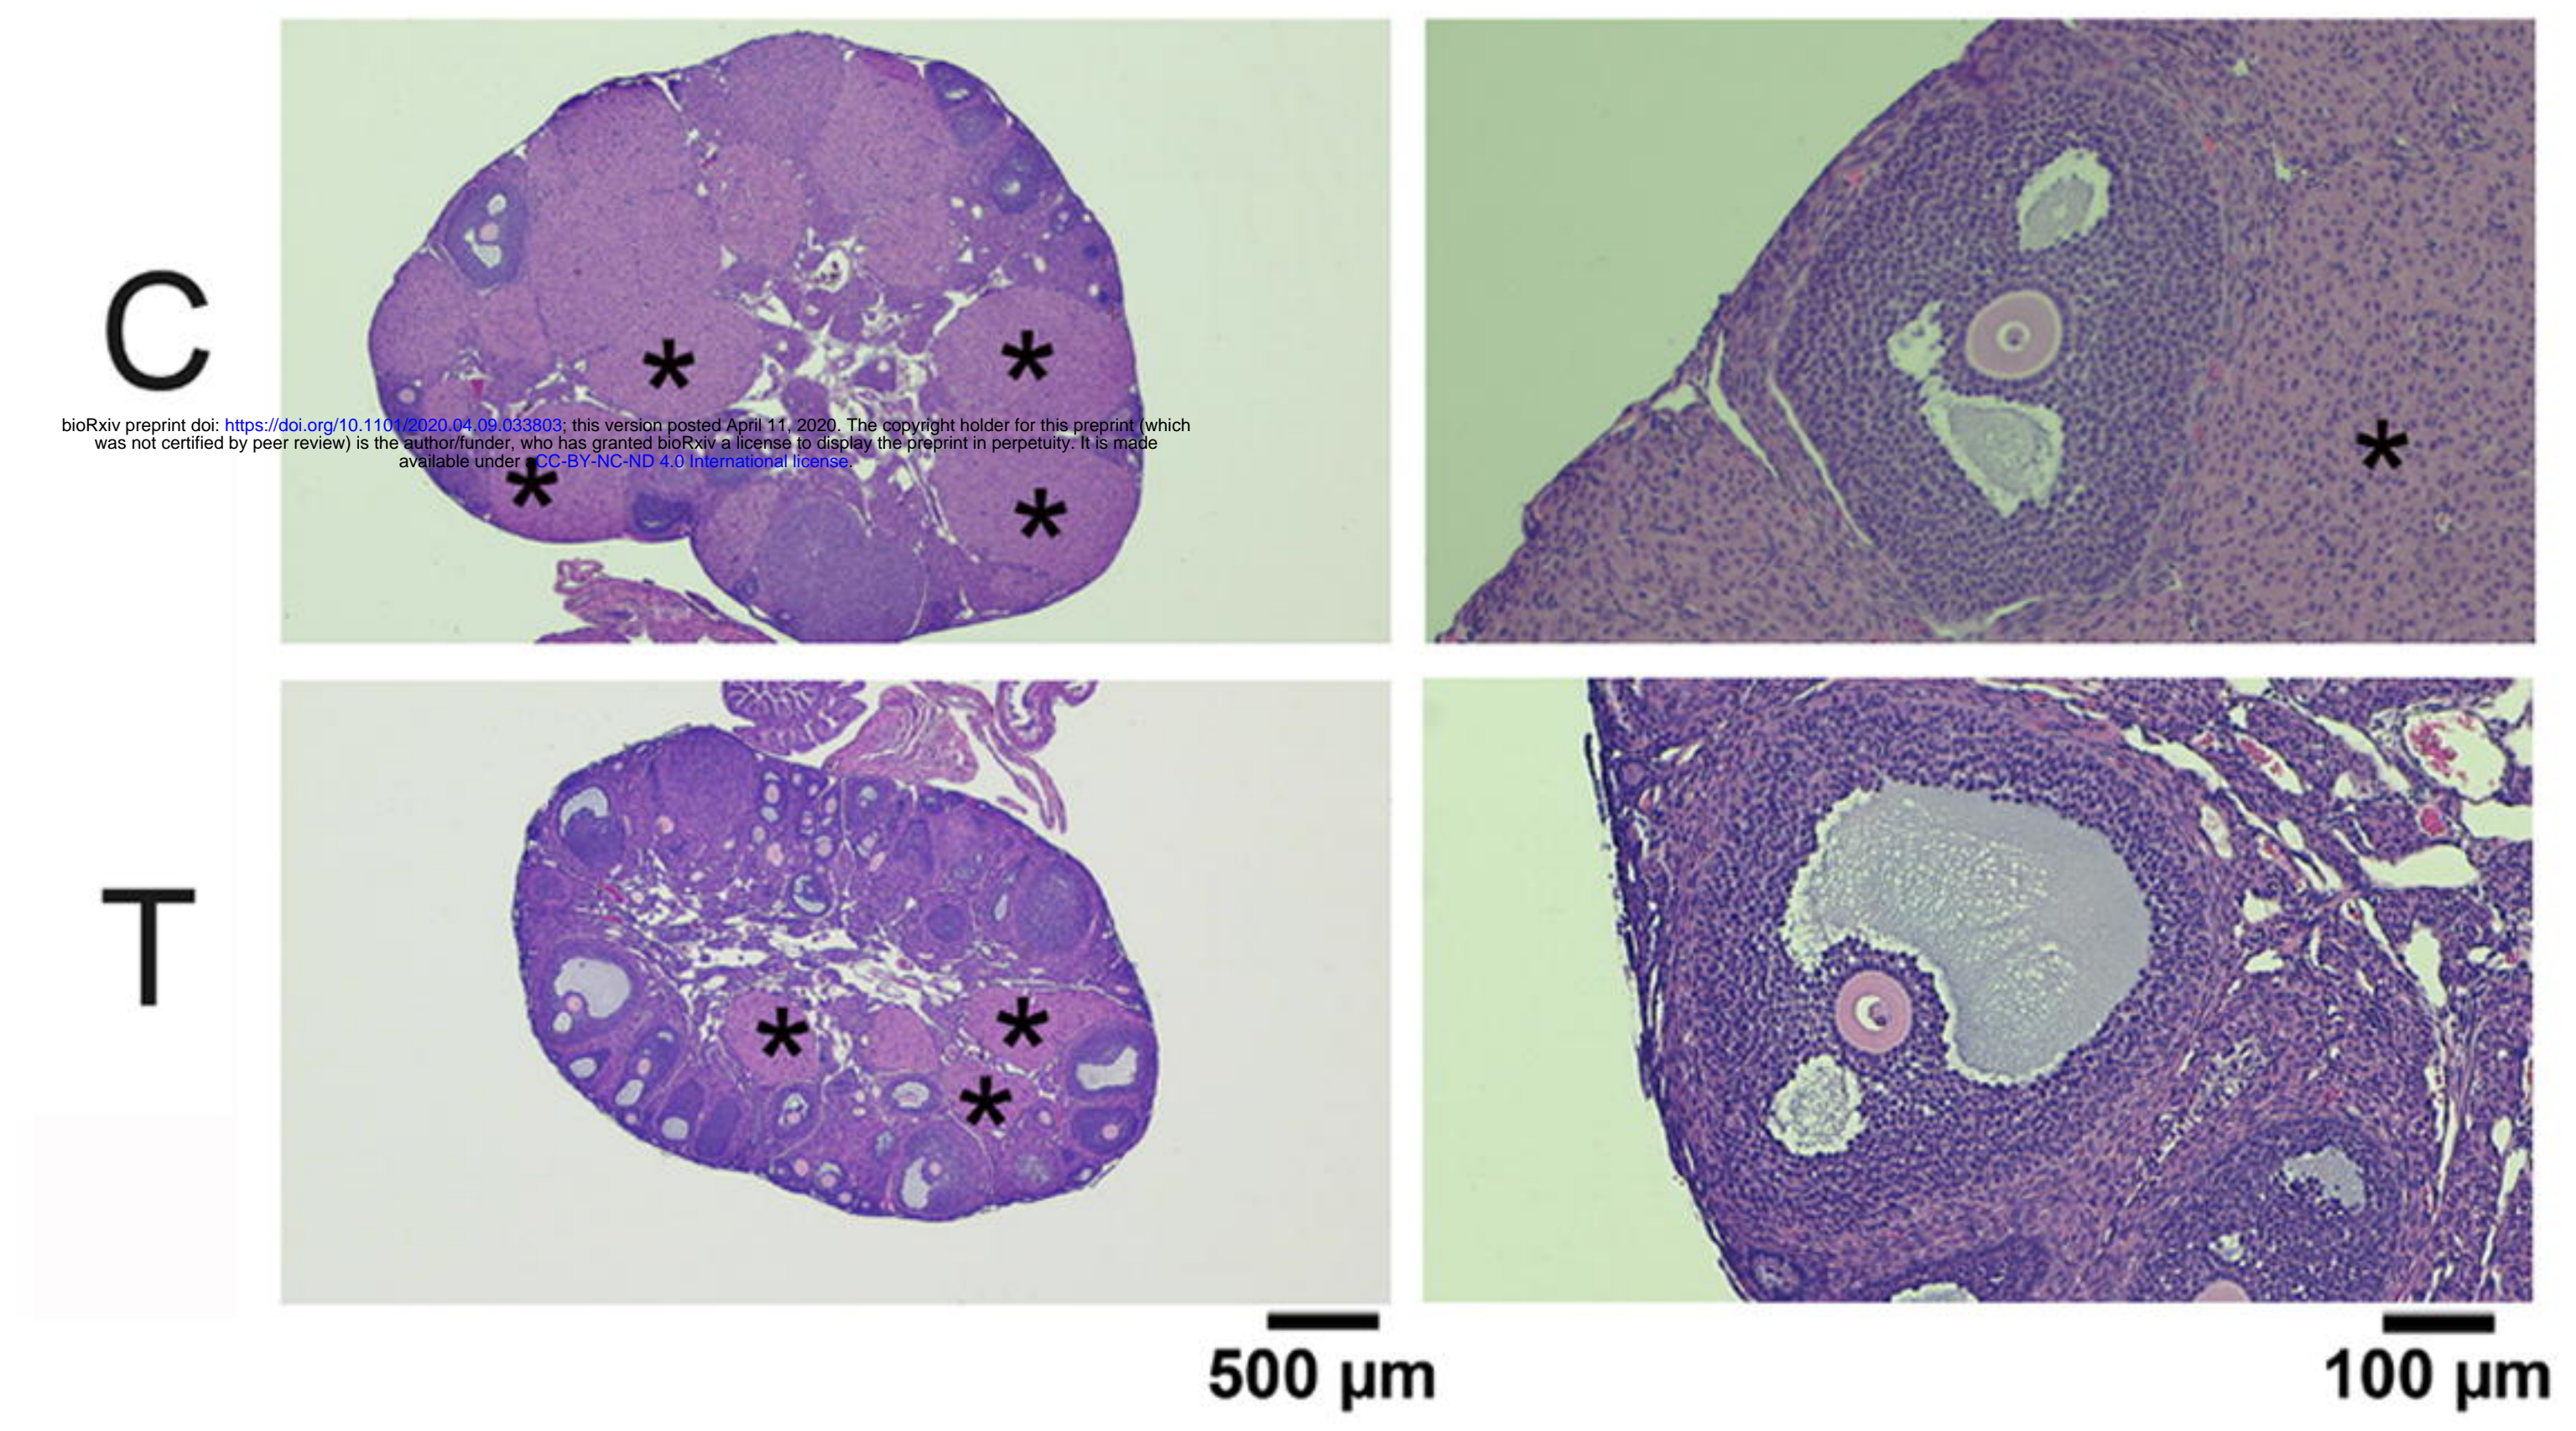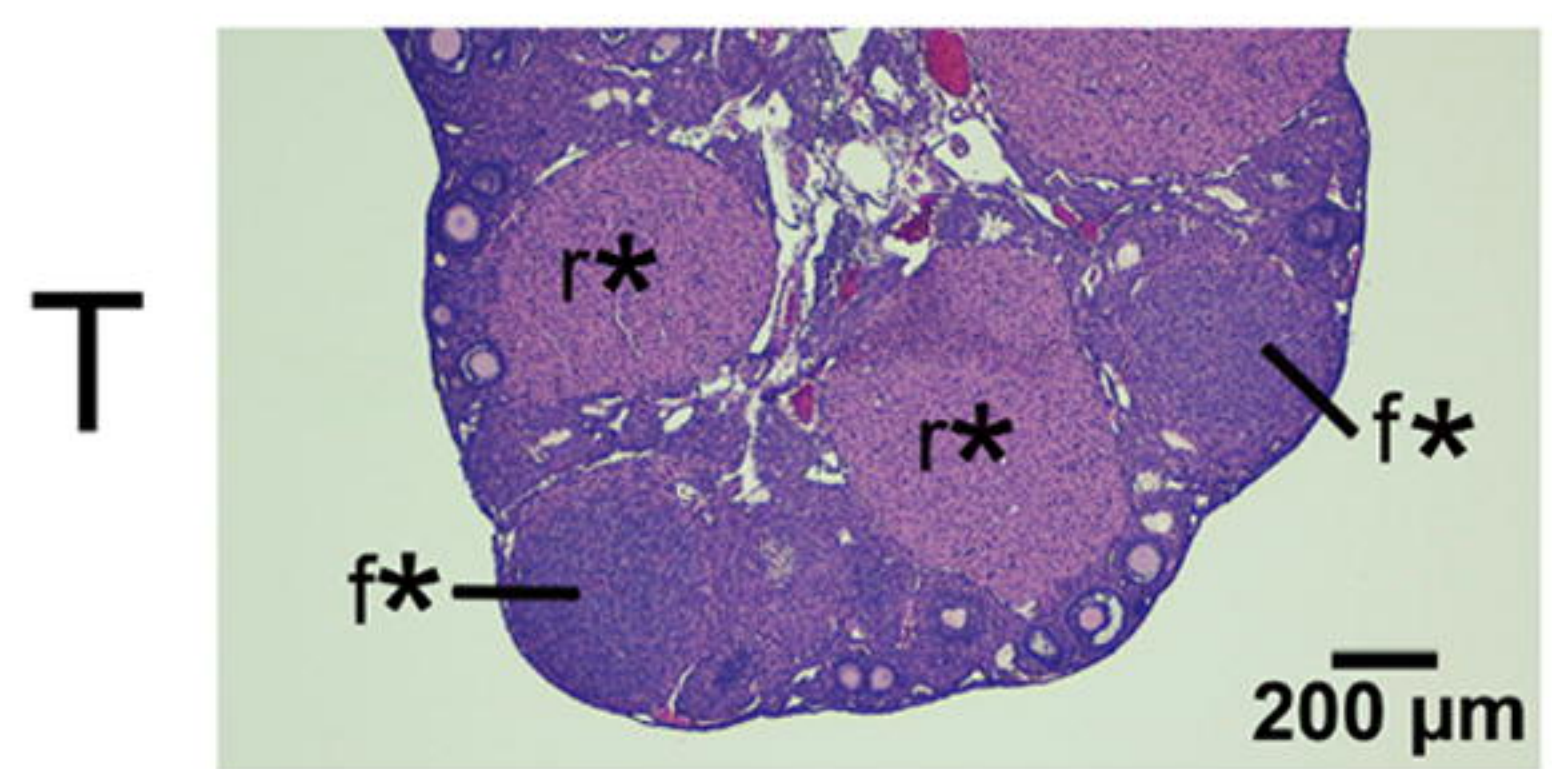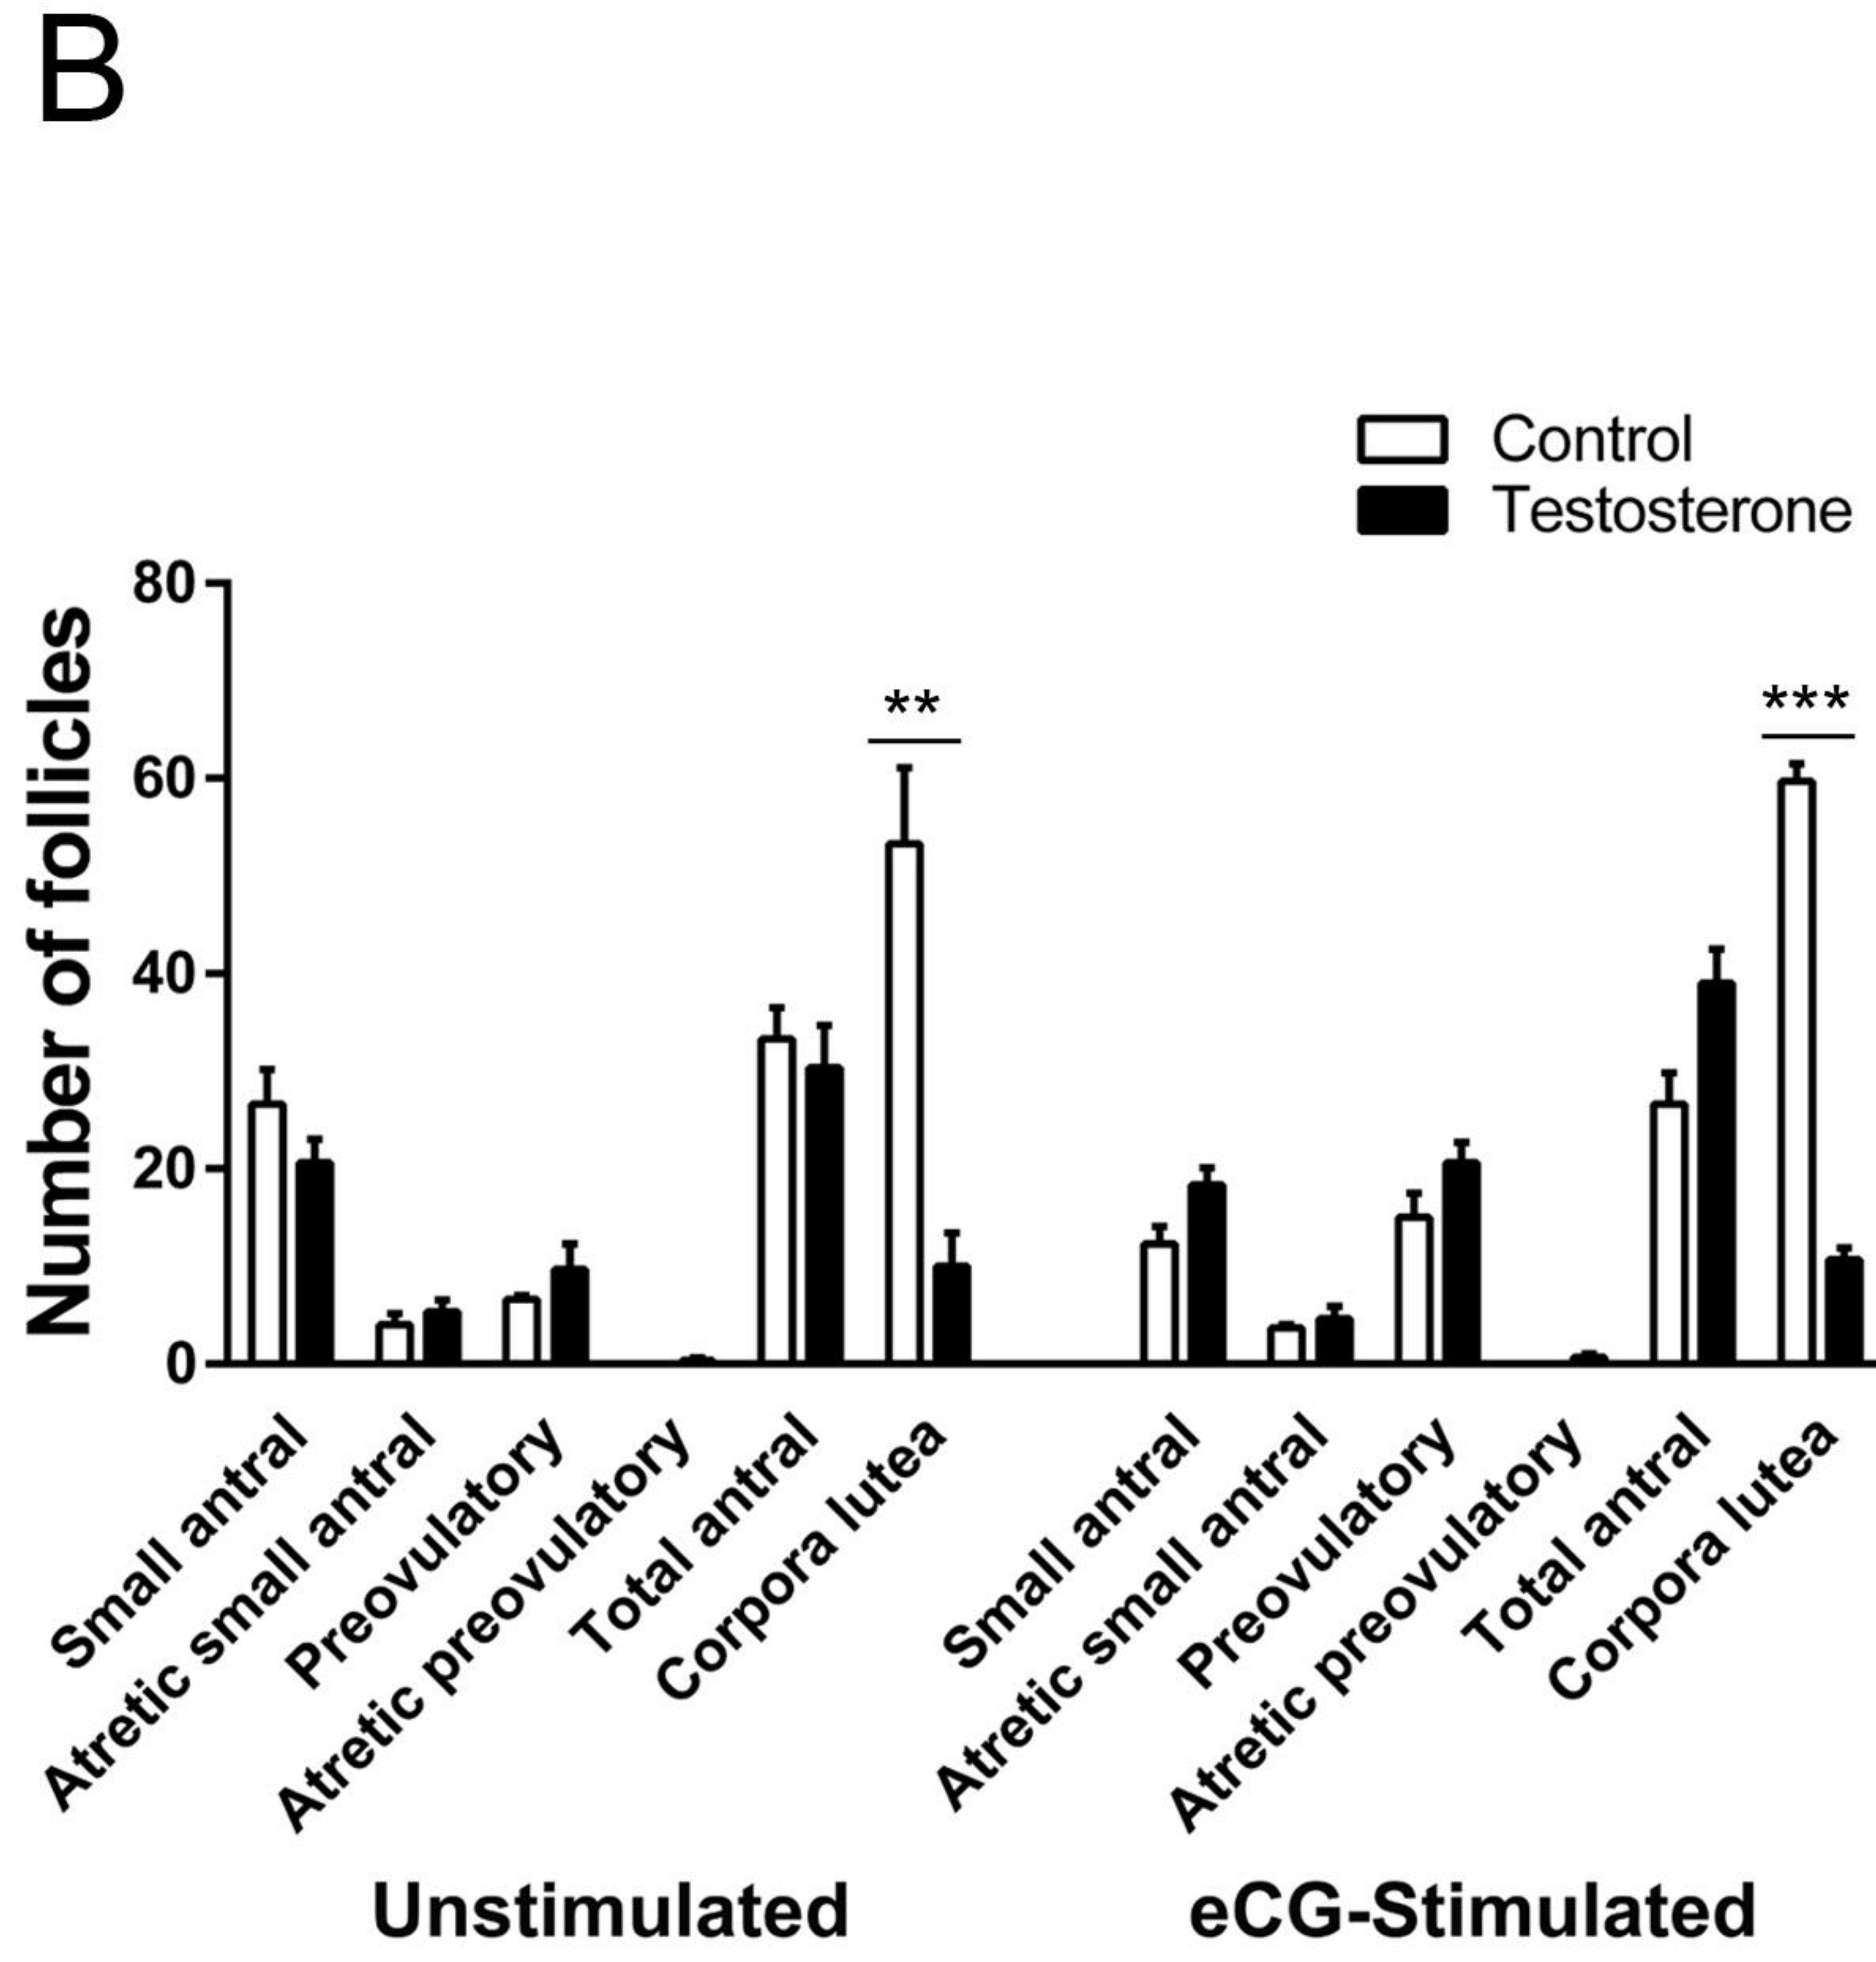

bioRxiv preprint doi: <https://doi.org/10.1101/2020.04.09.033803>; this version posted April 11, 2020. The copyright holder for this preprint (which was not certified by peer review) is the author/funder, who has granted bioRxiv a license to display the preprint in perpetuity. It is made available under aCC-BY-NC-ND 4.0 International license.

**A**

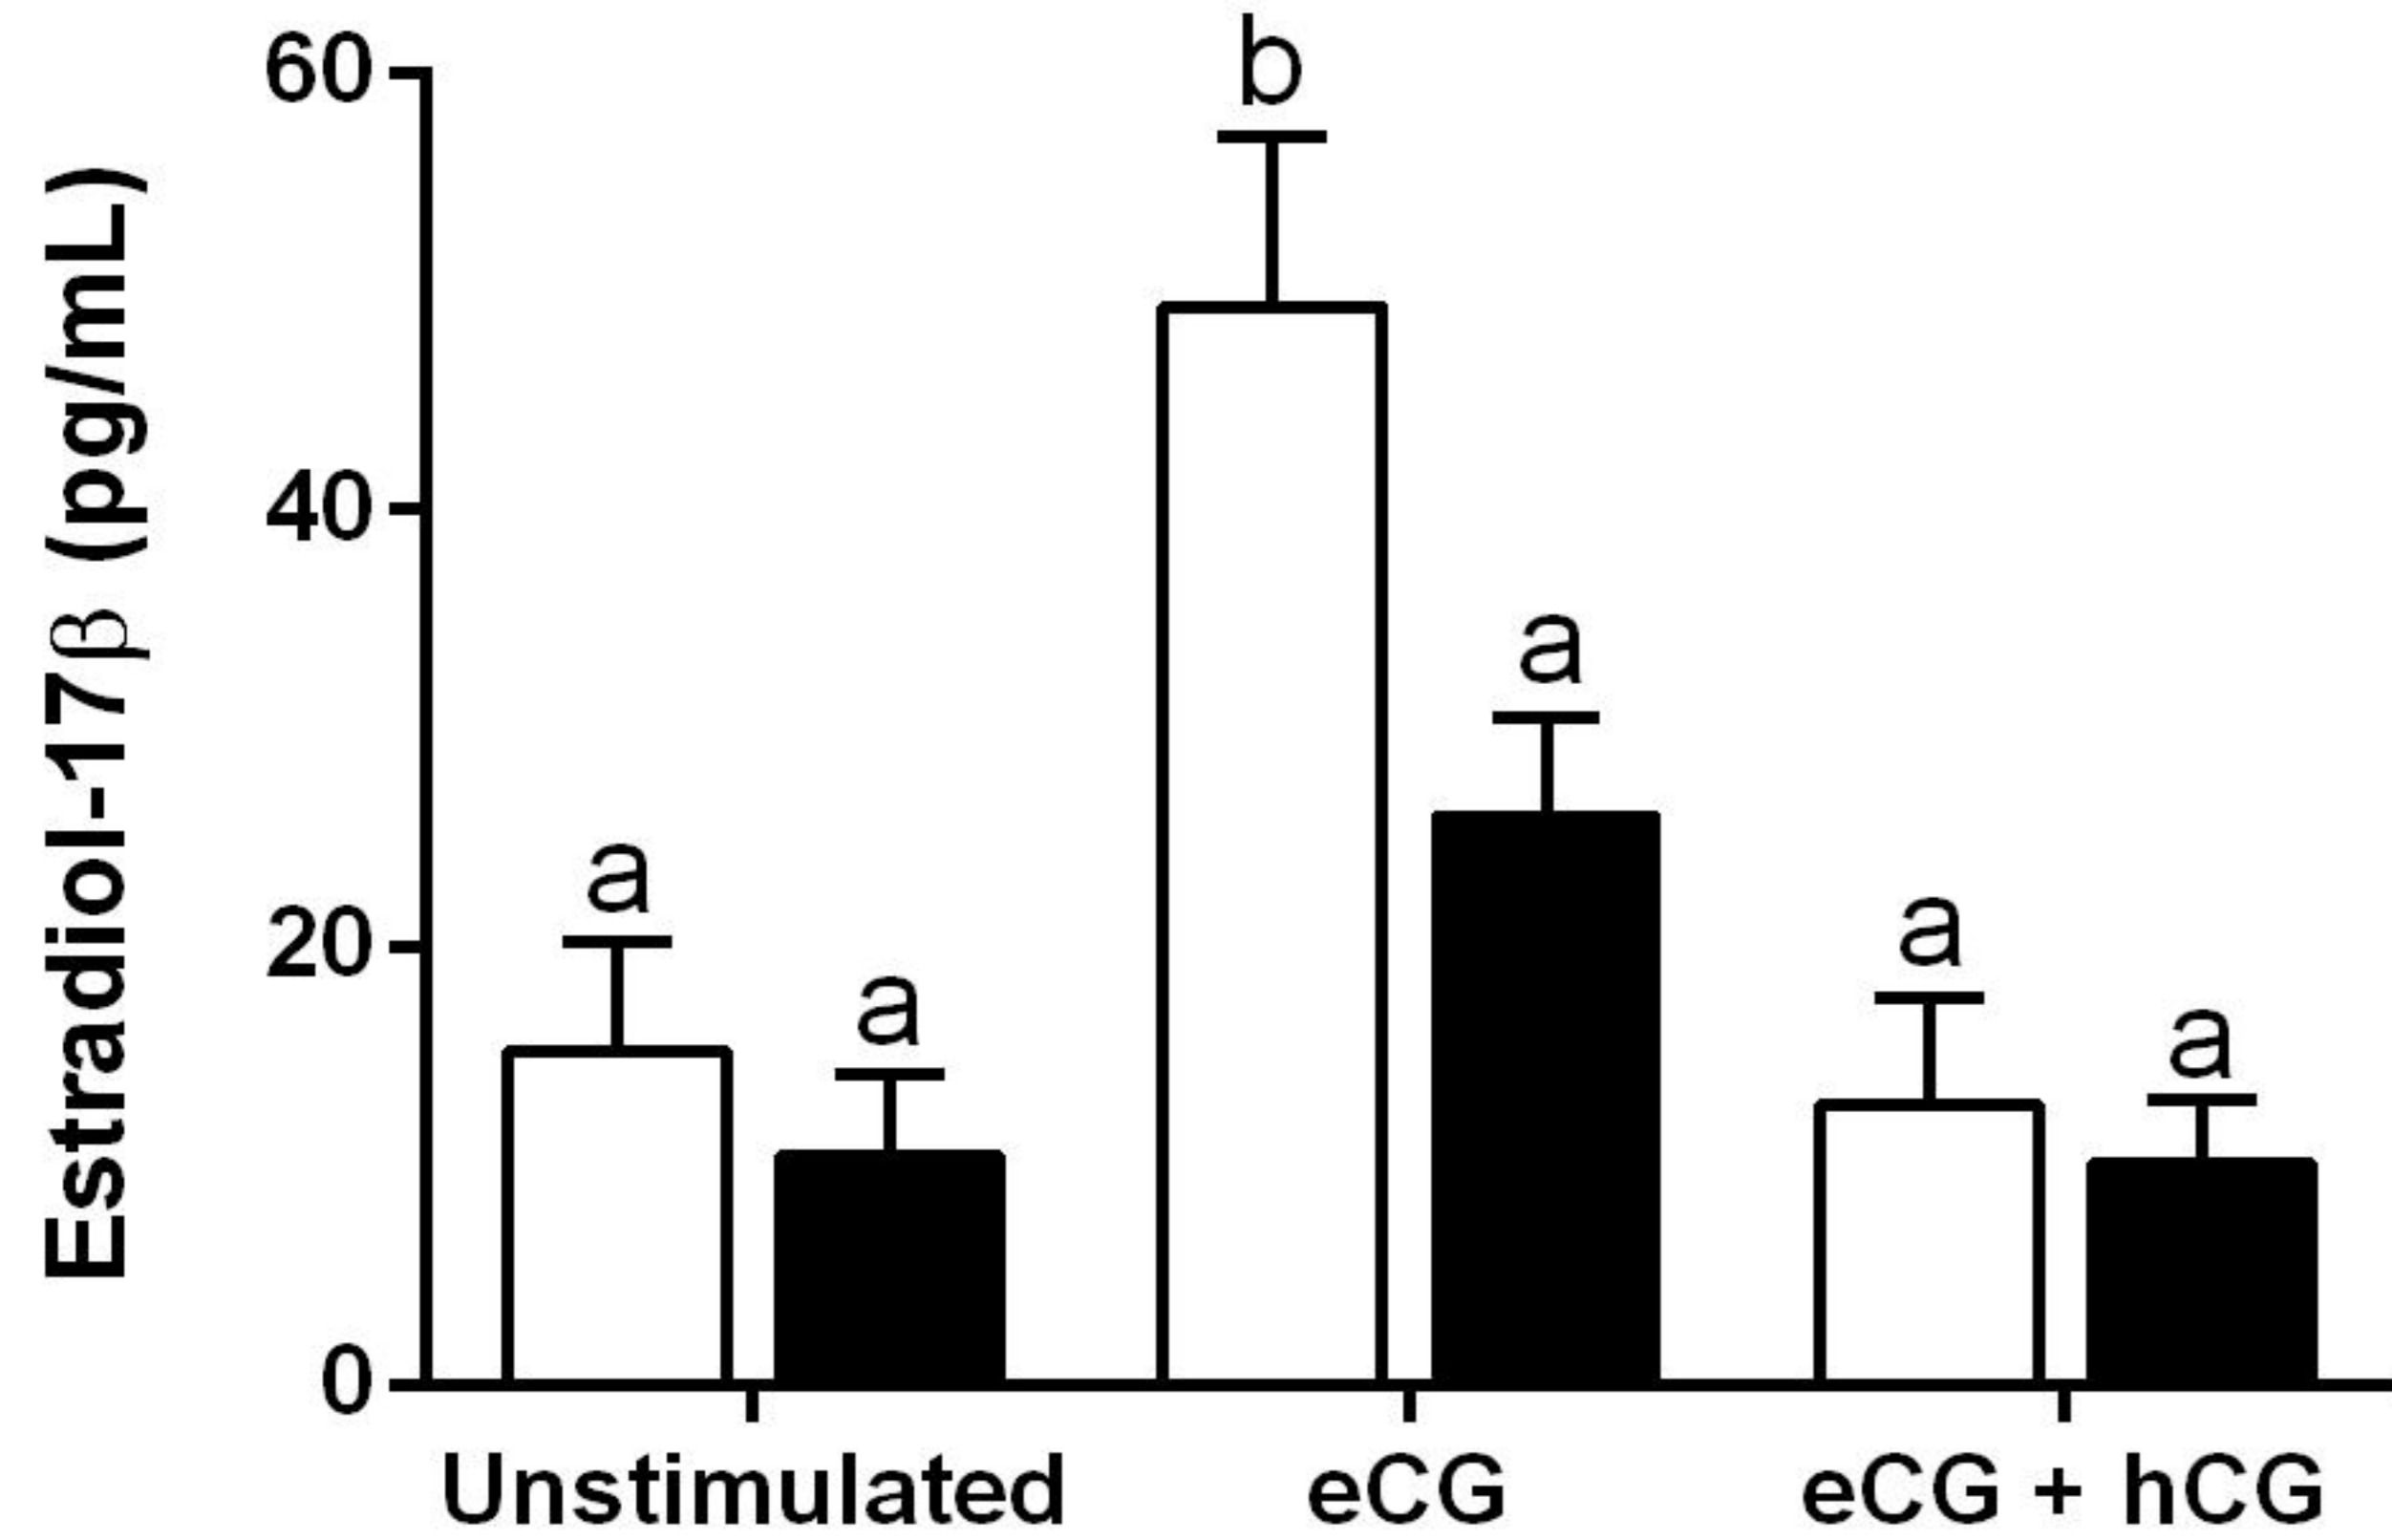

**B**

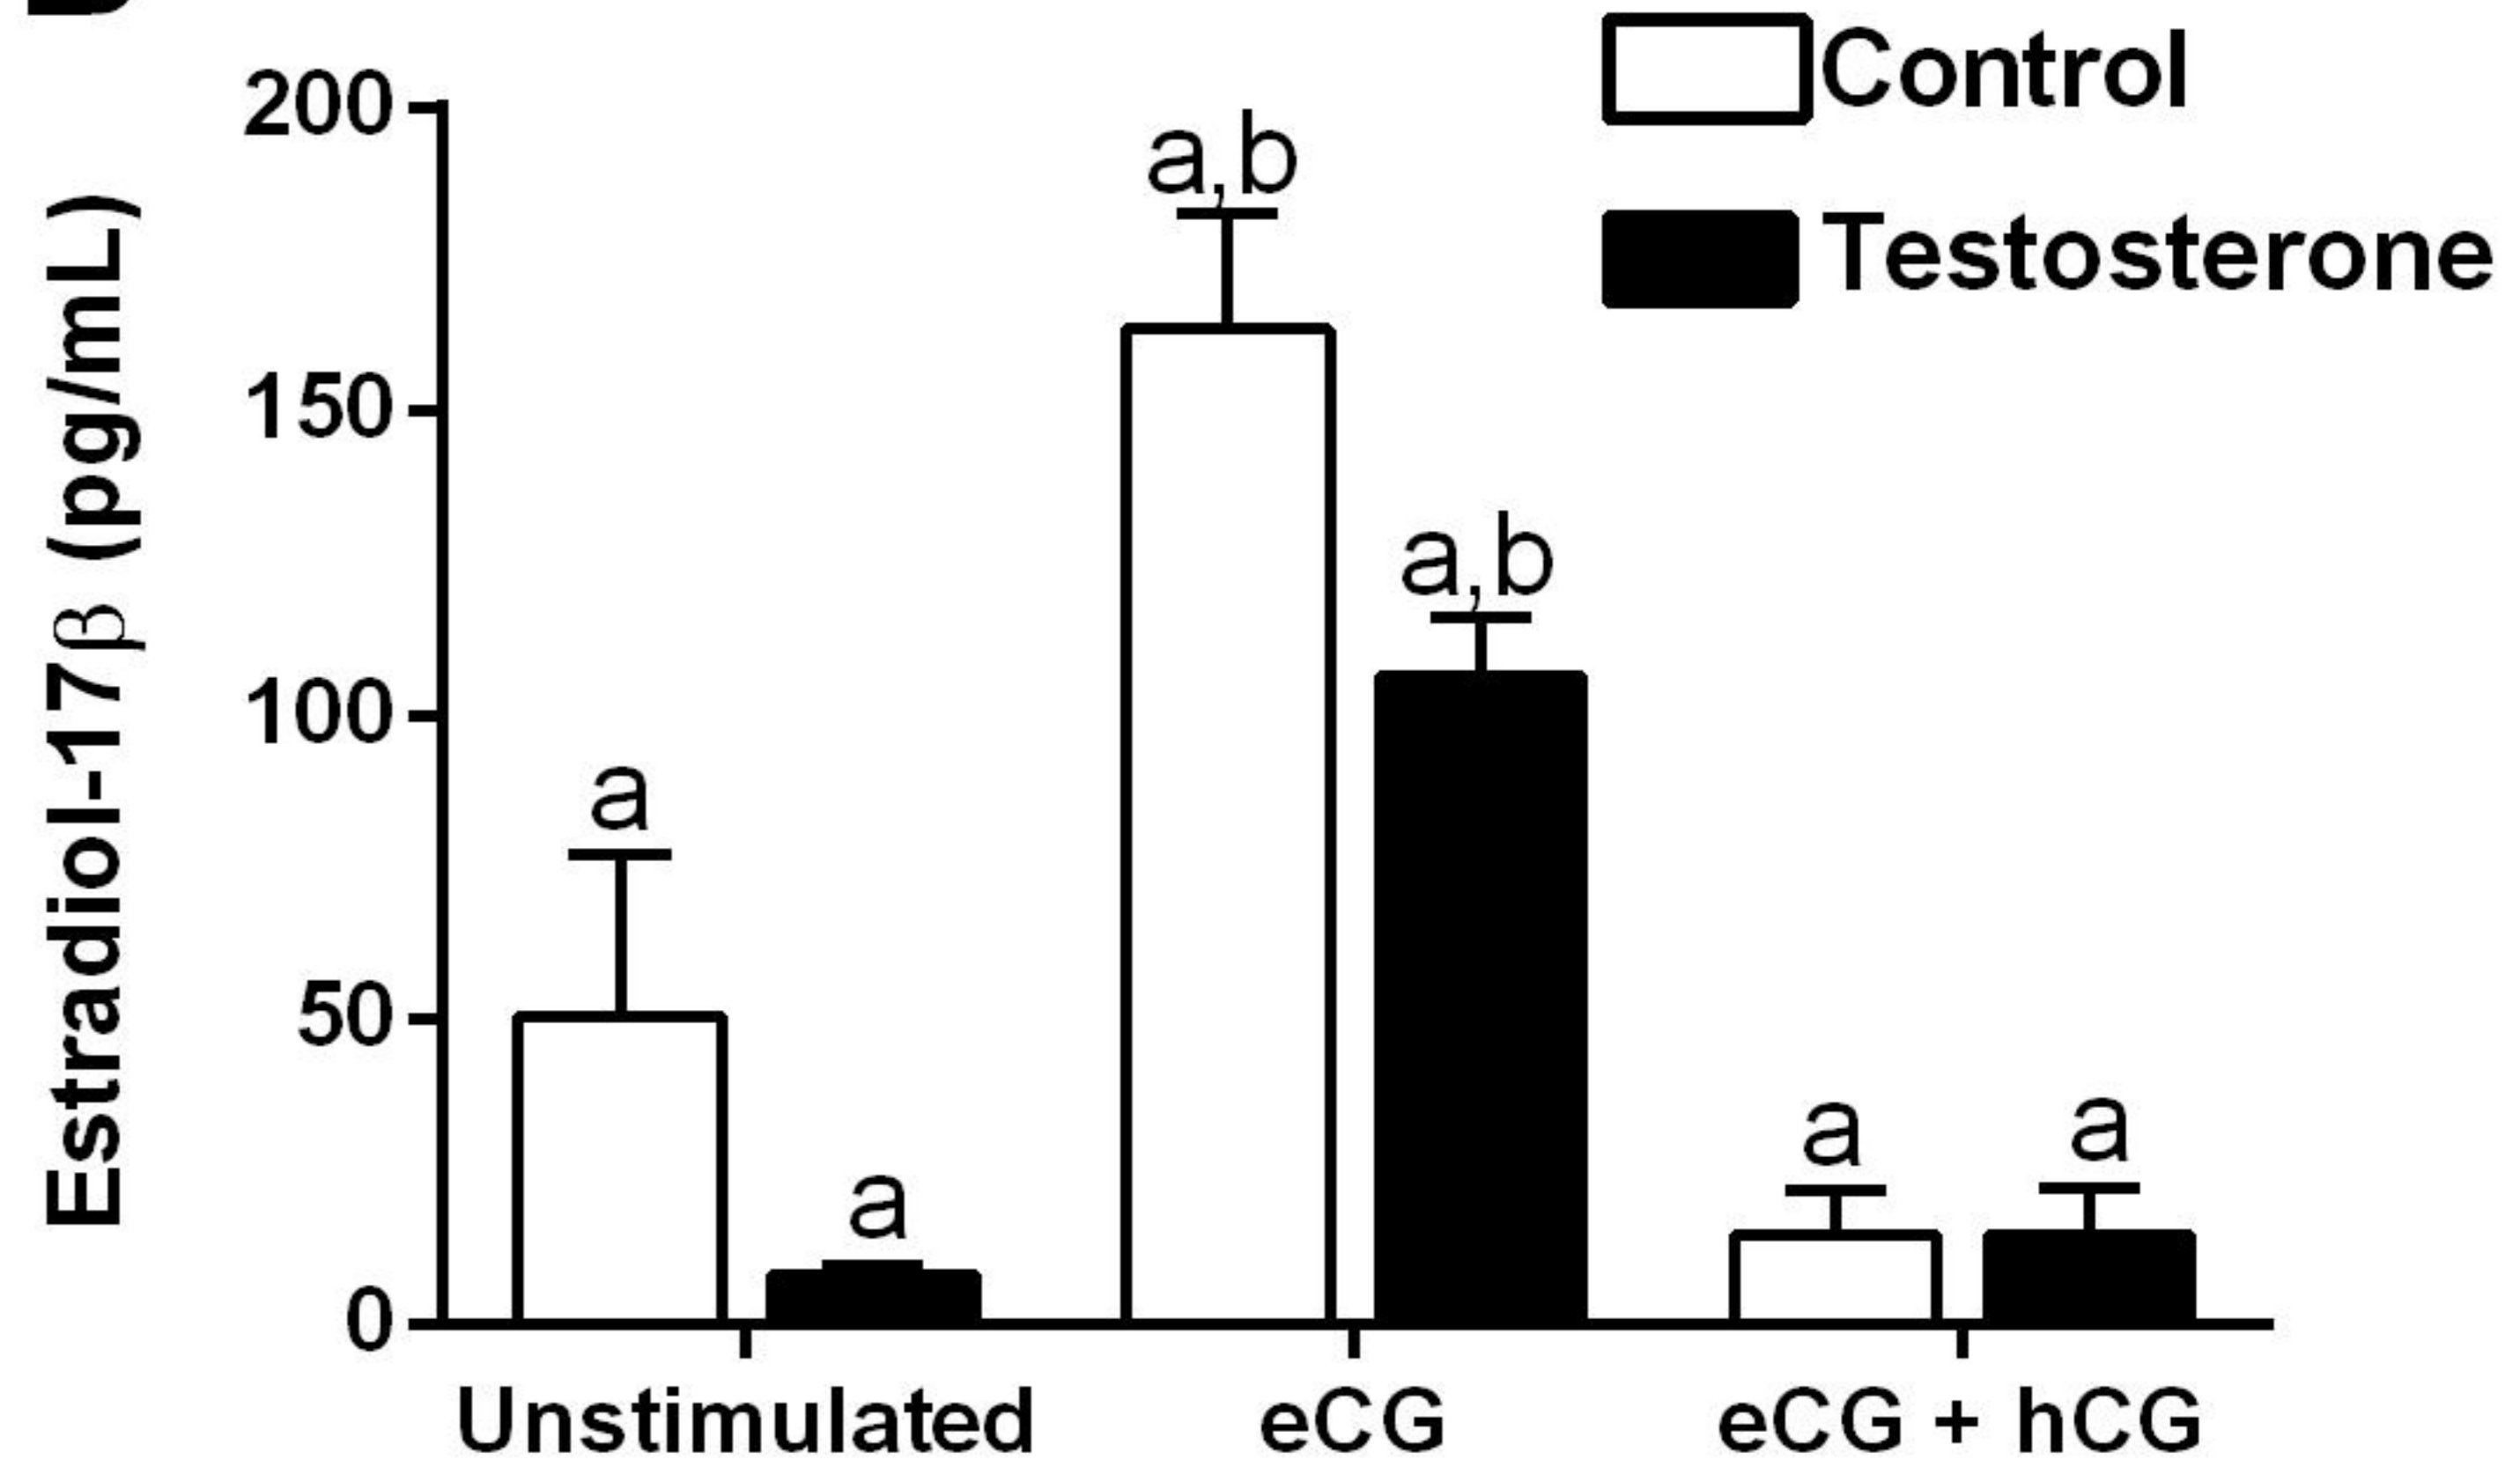

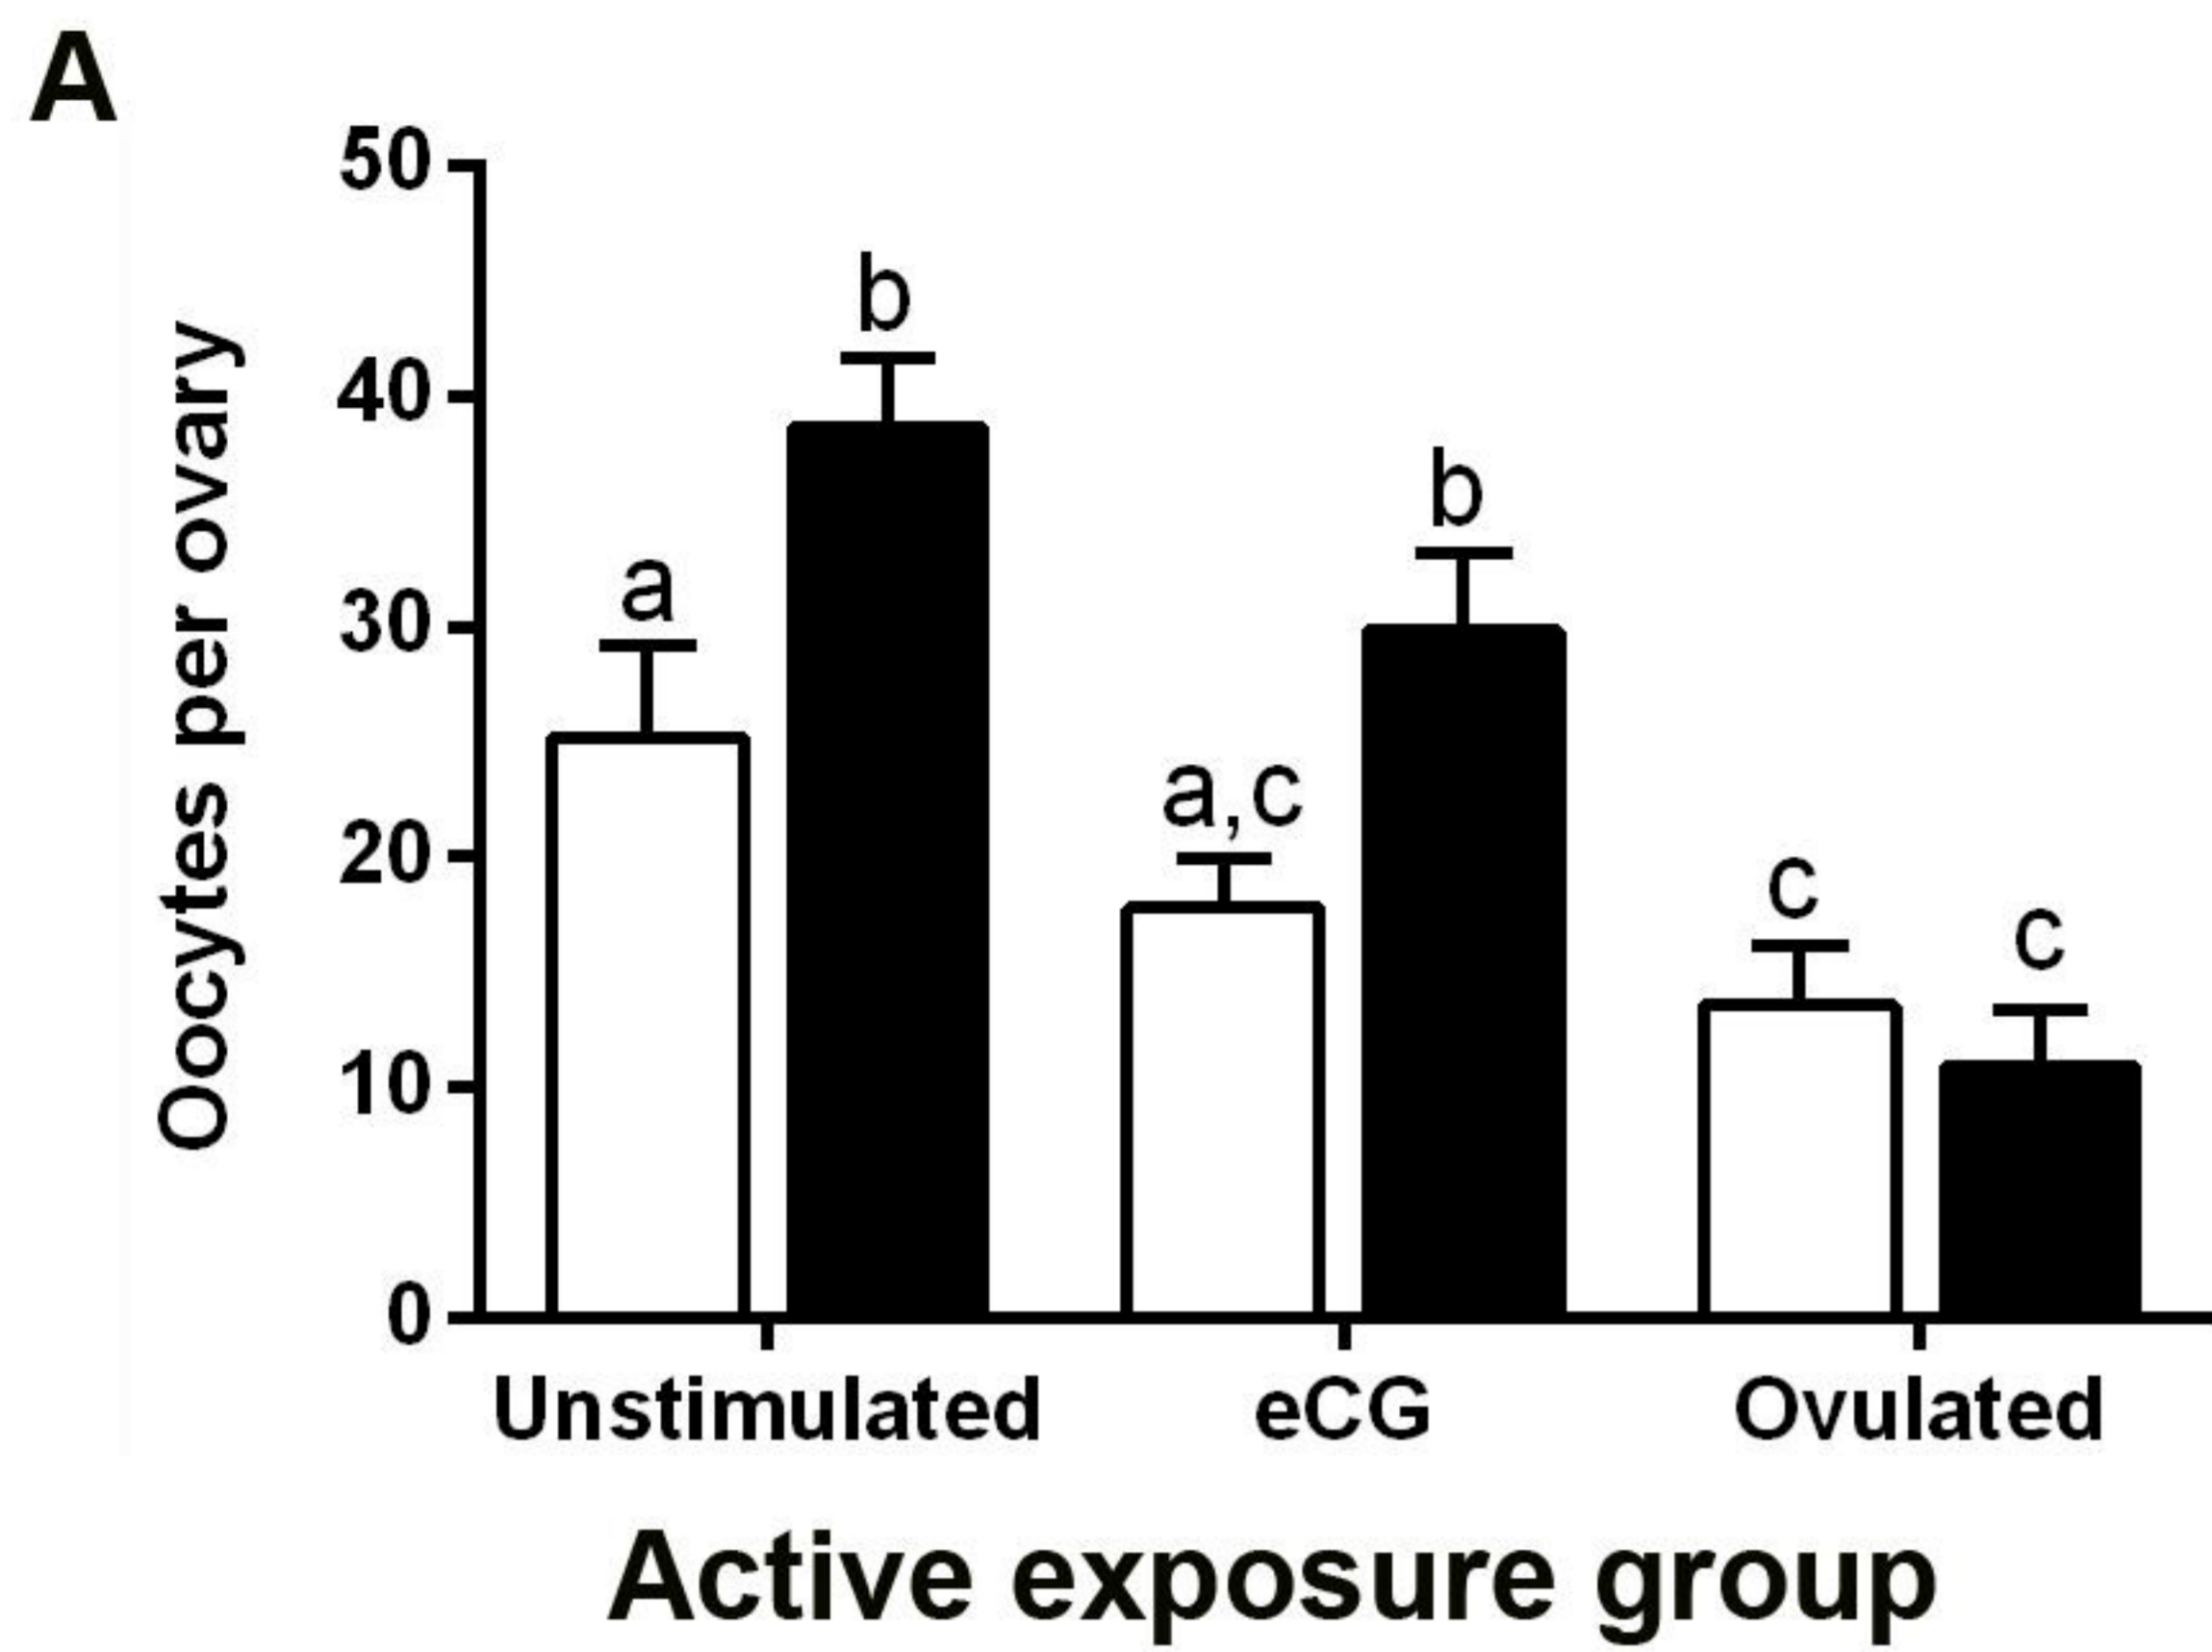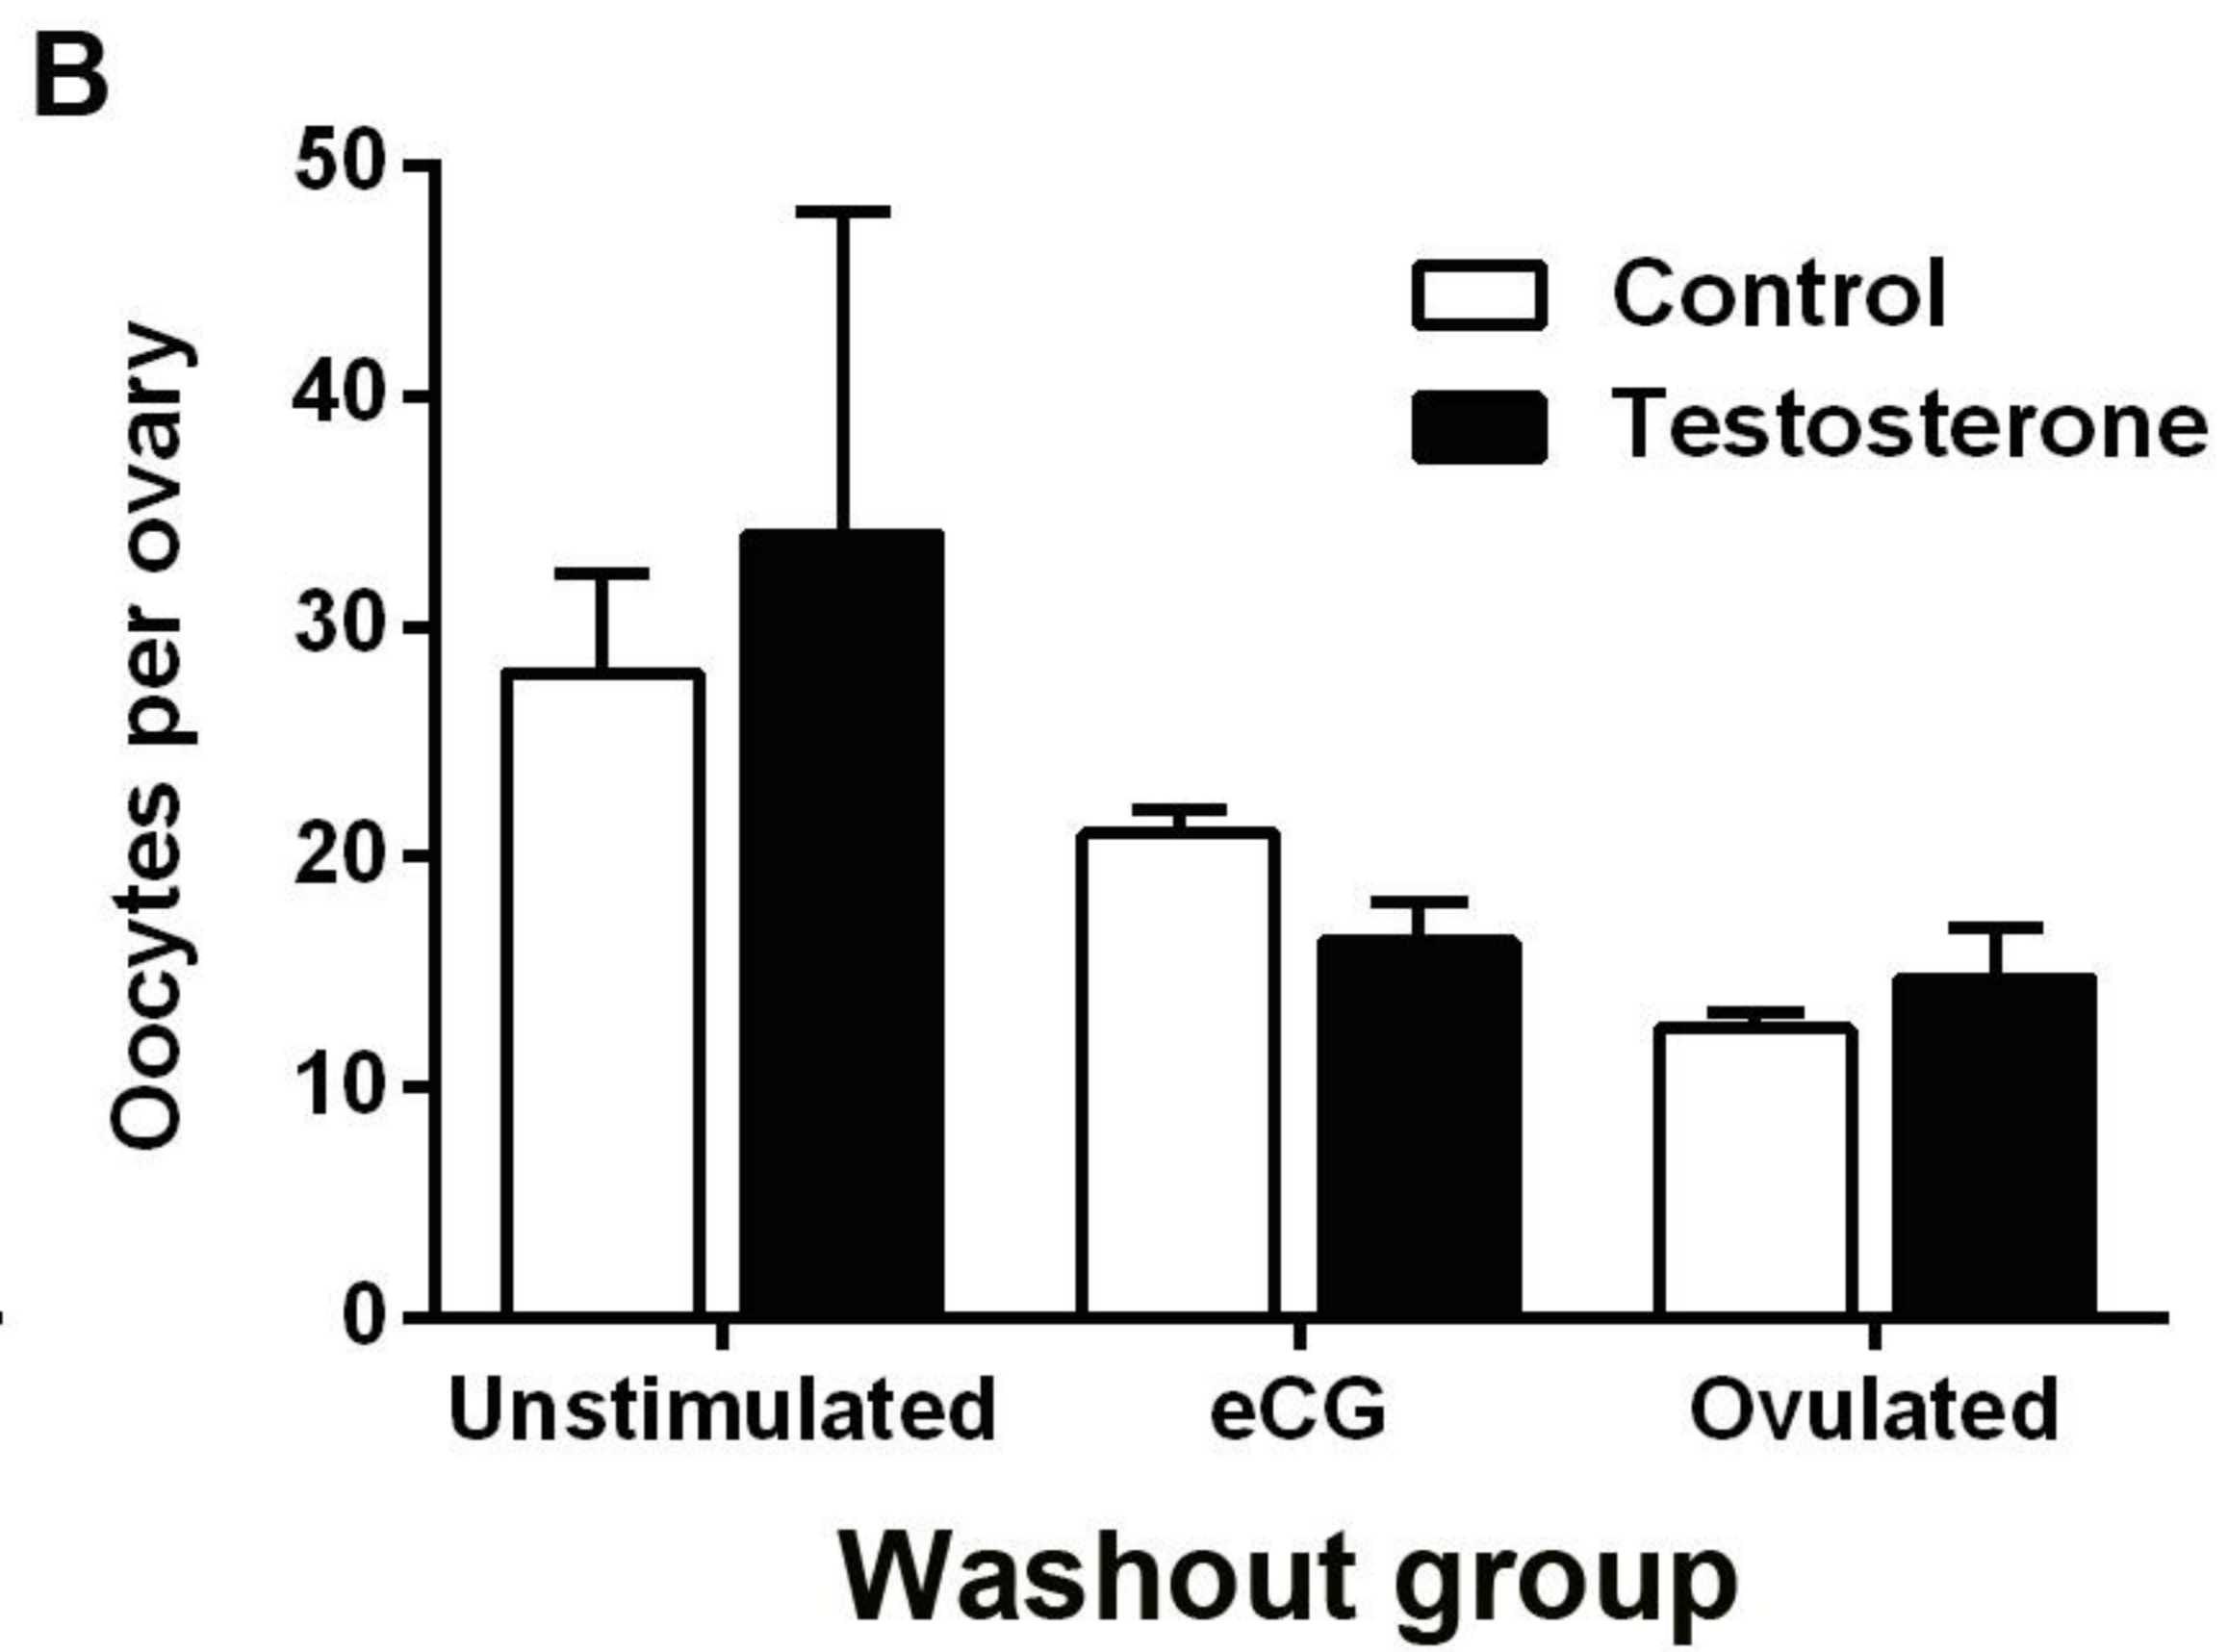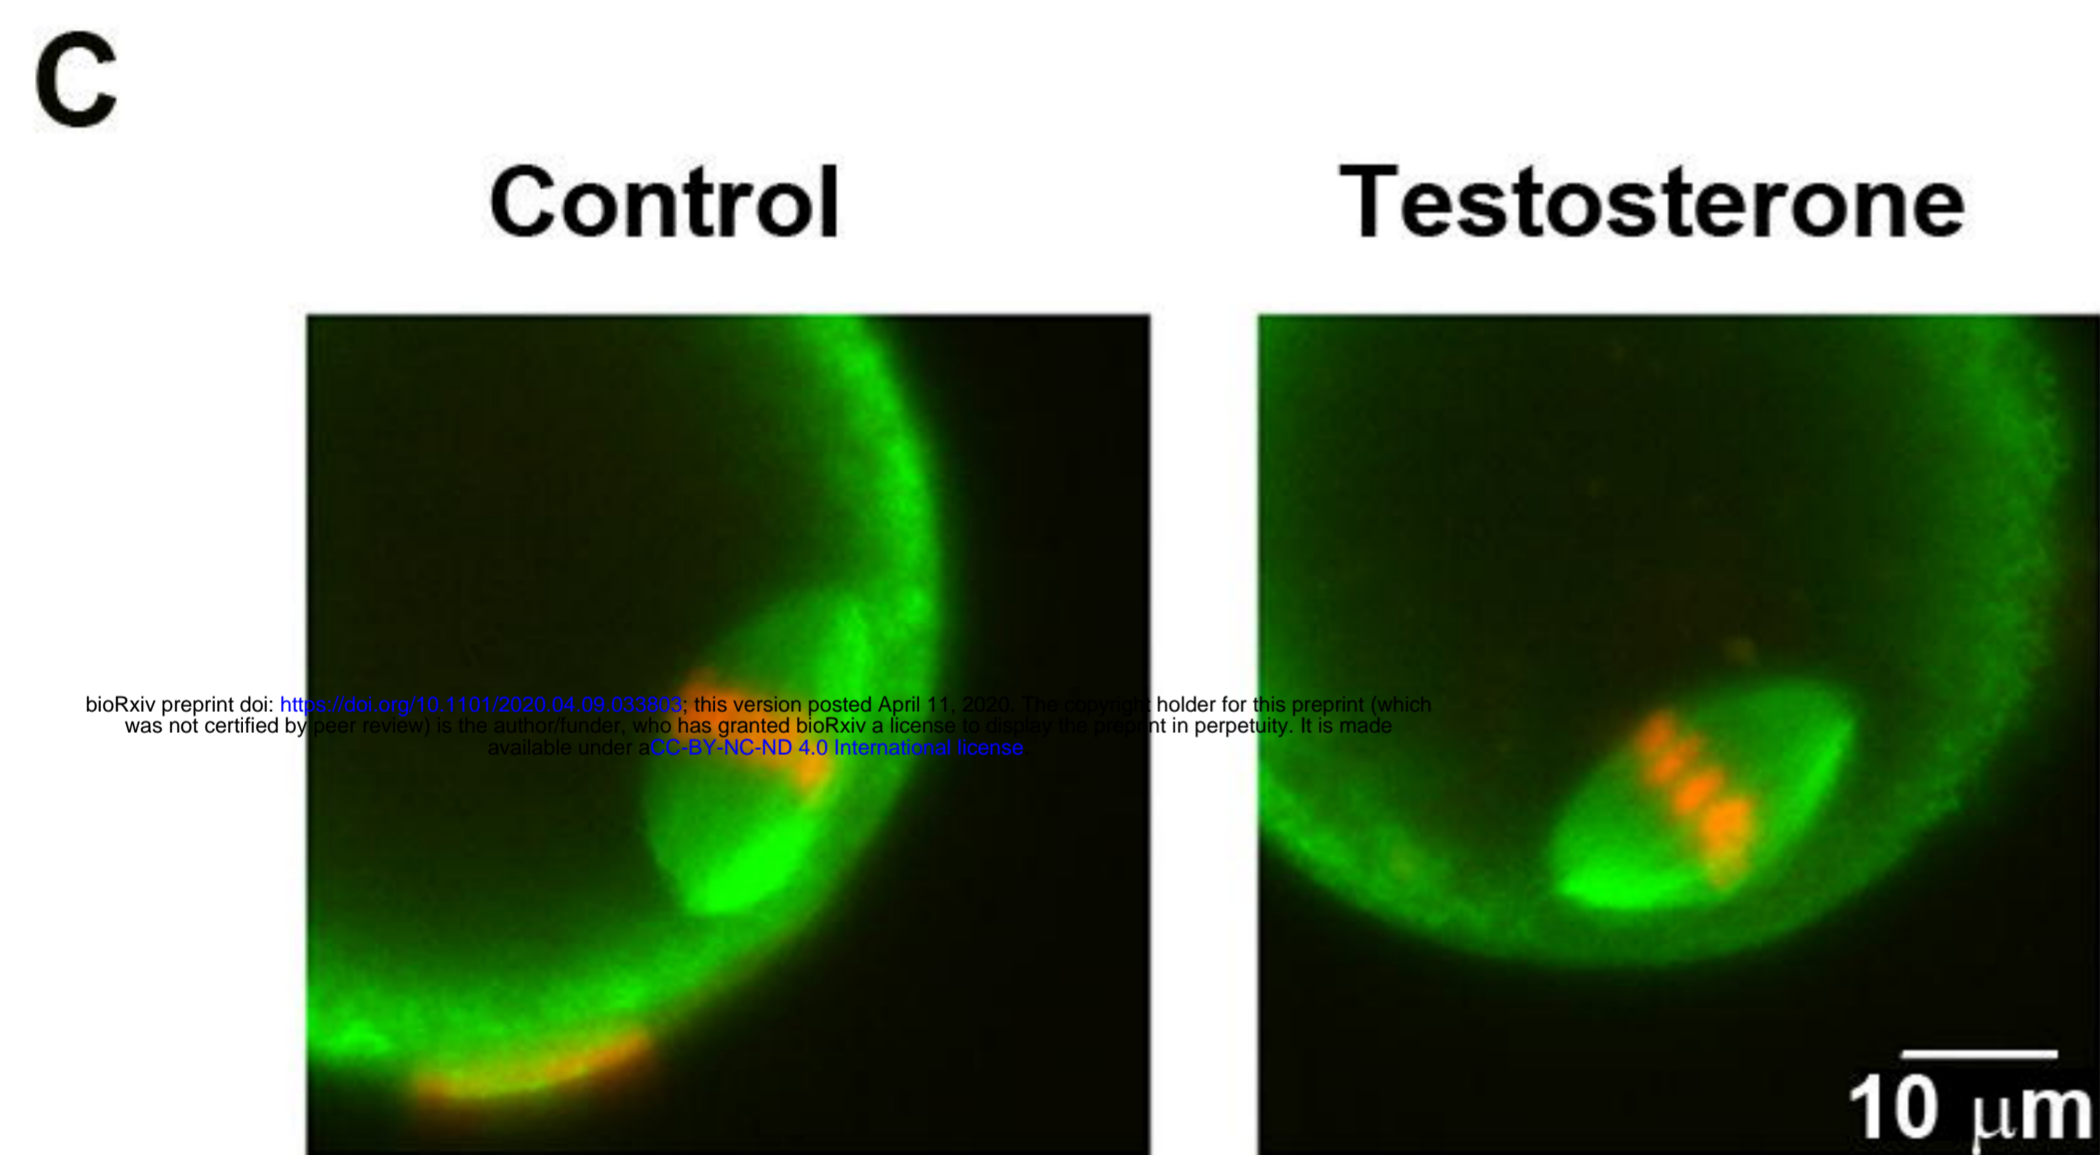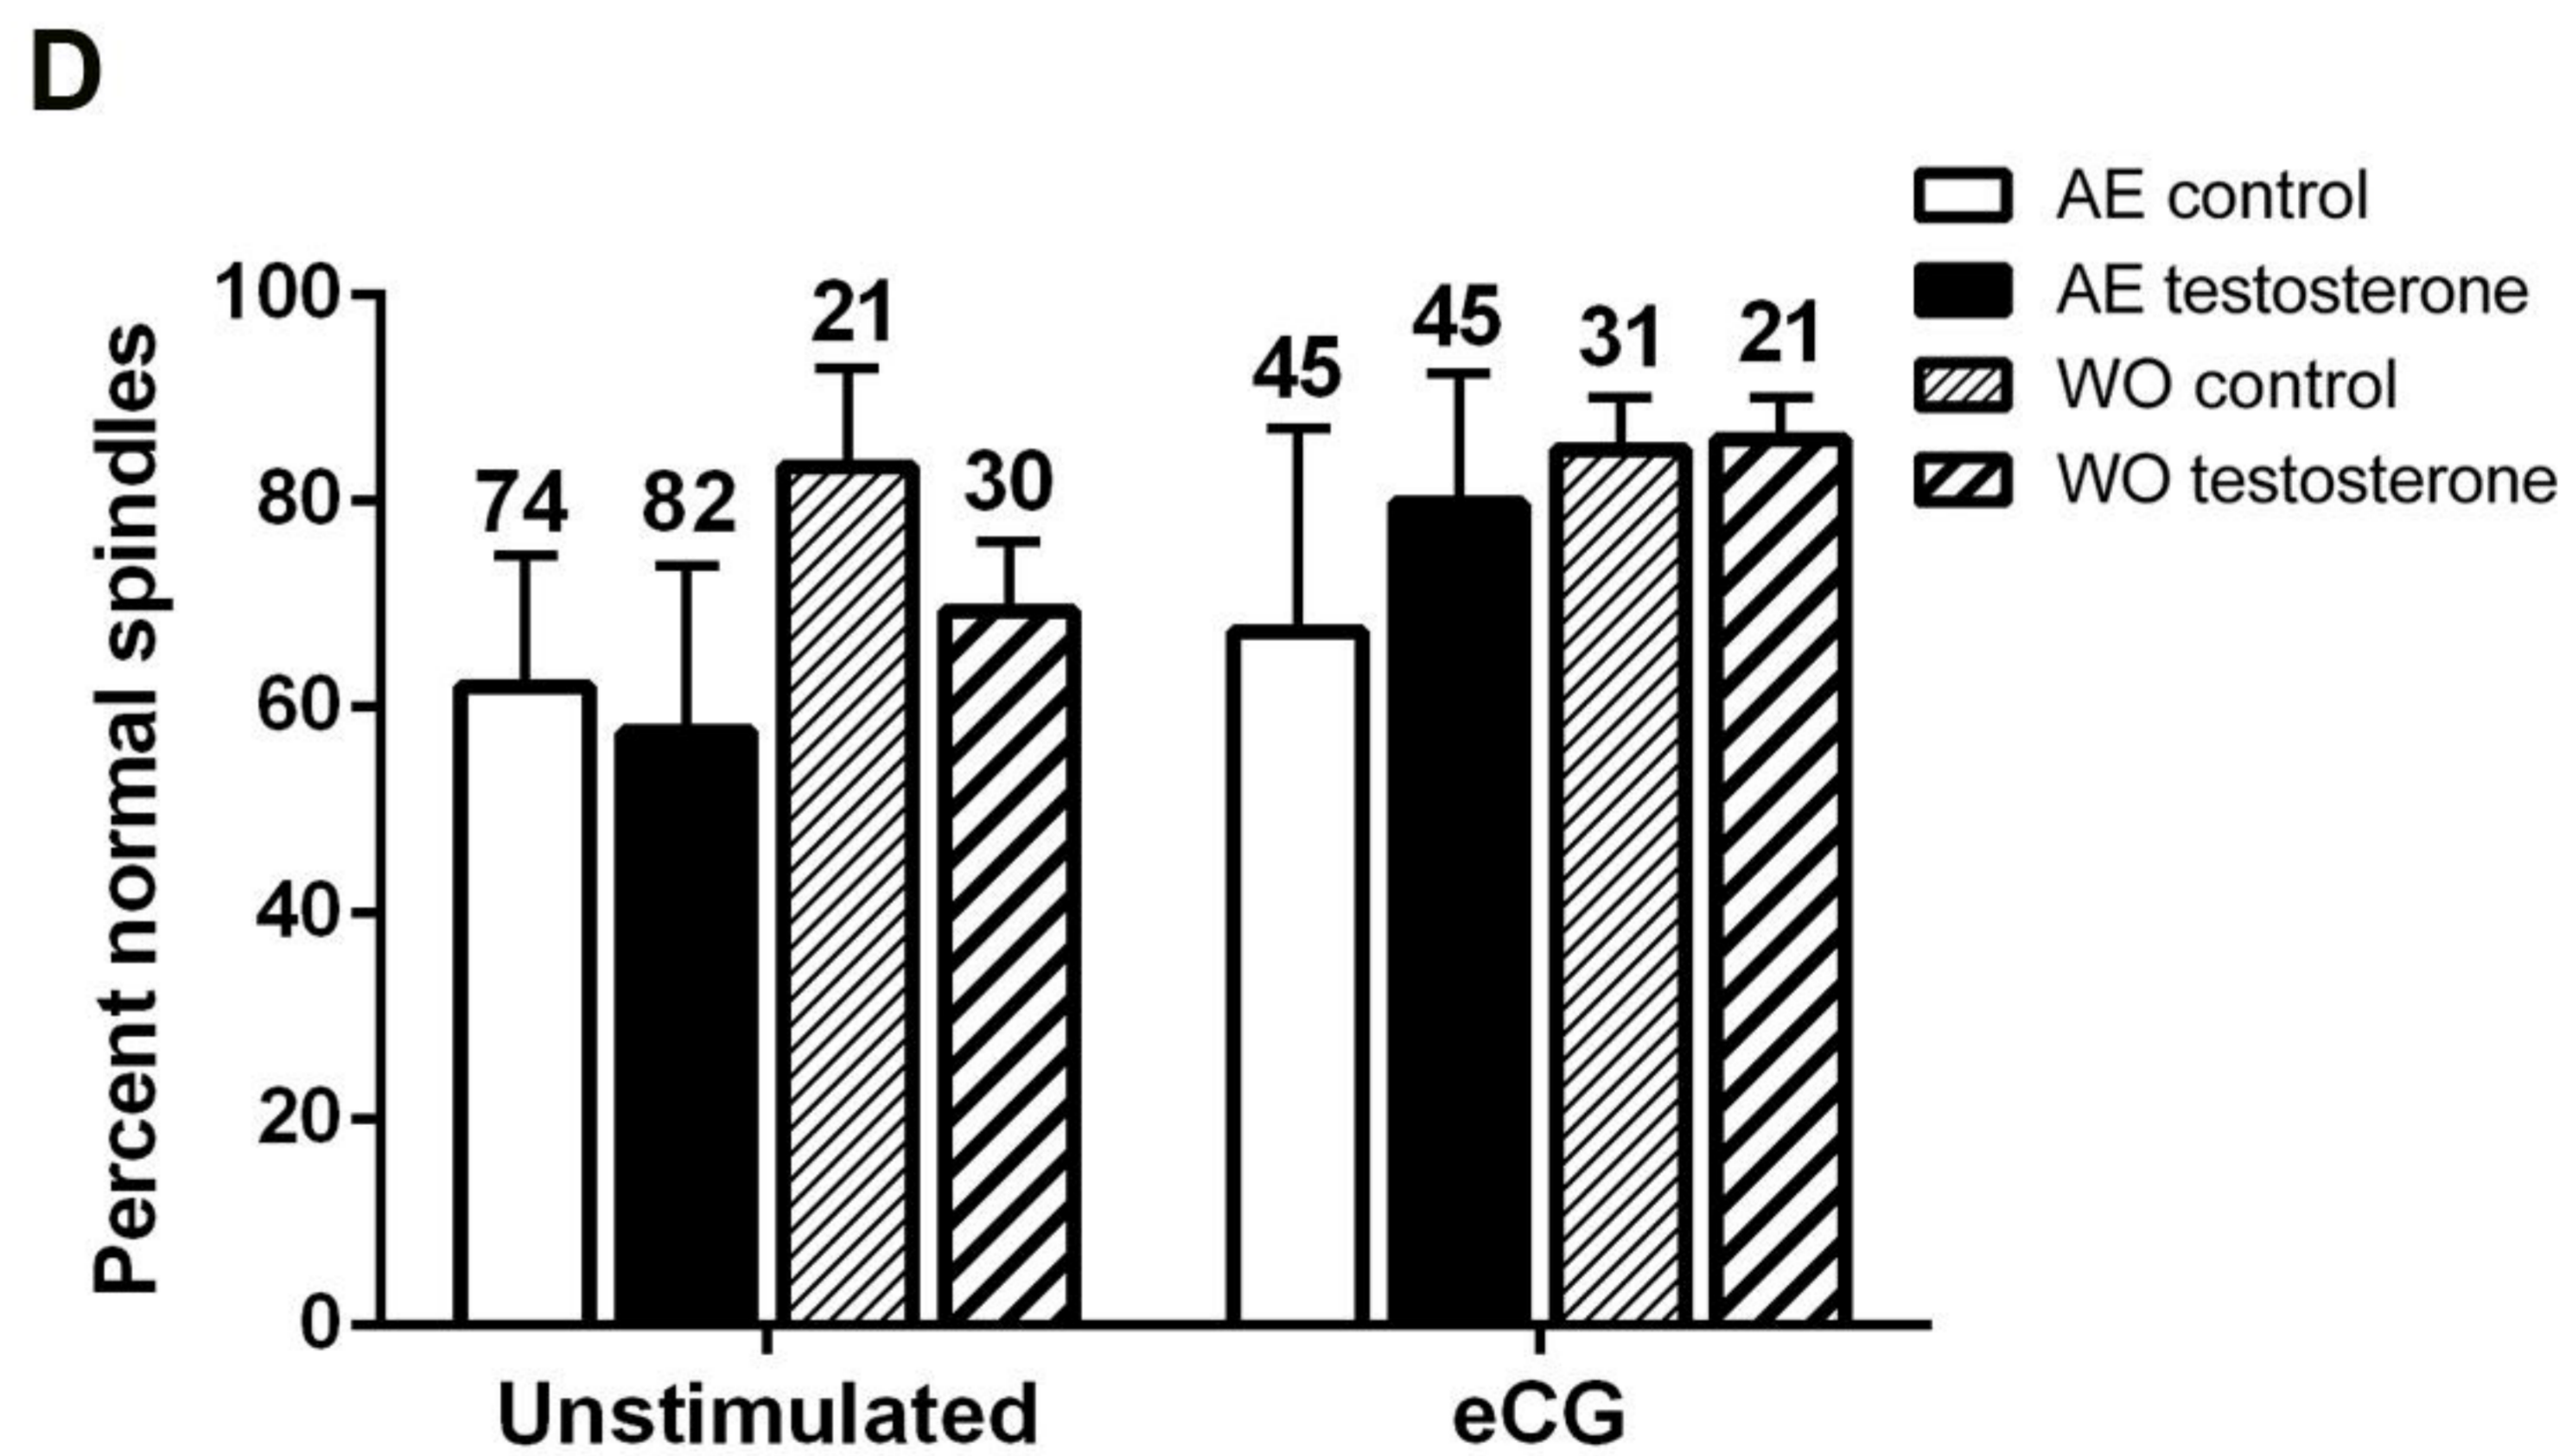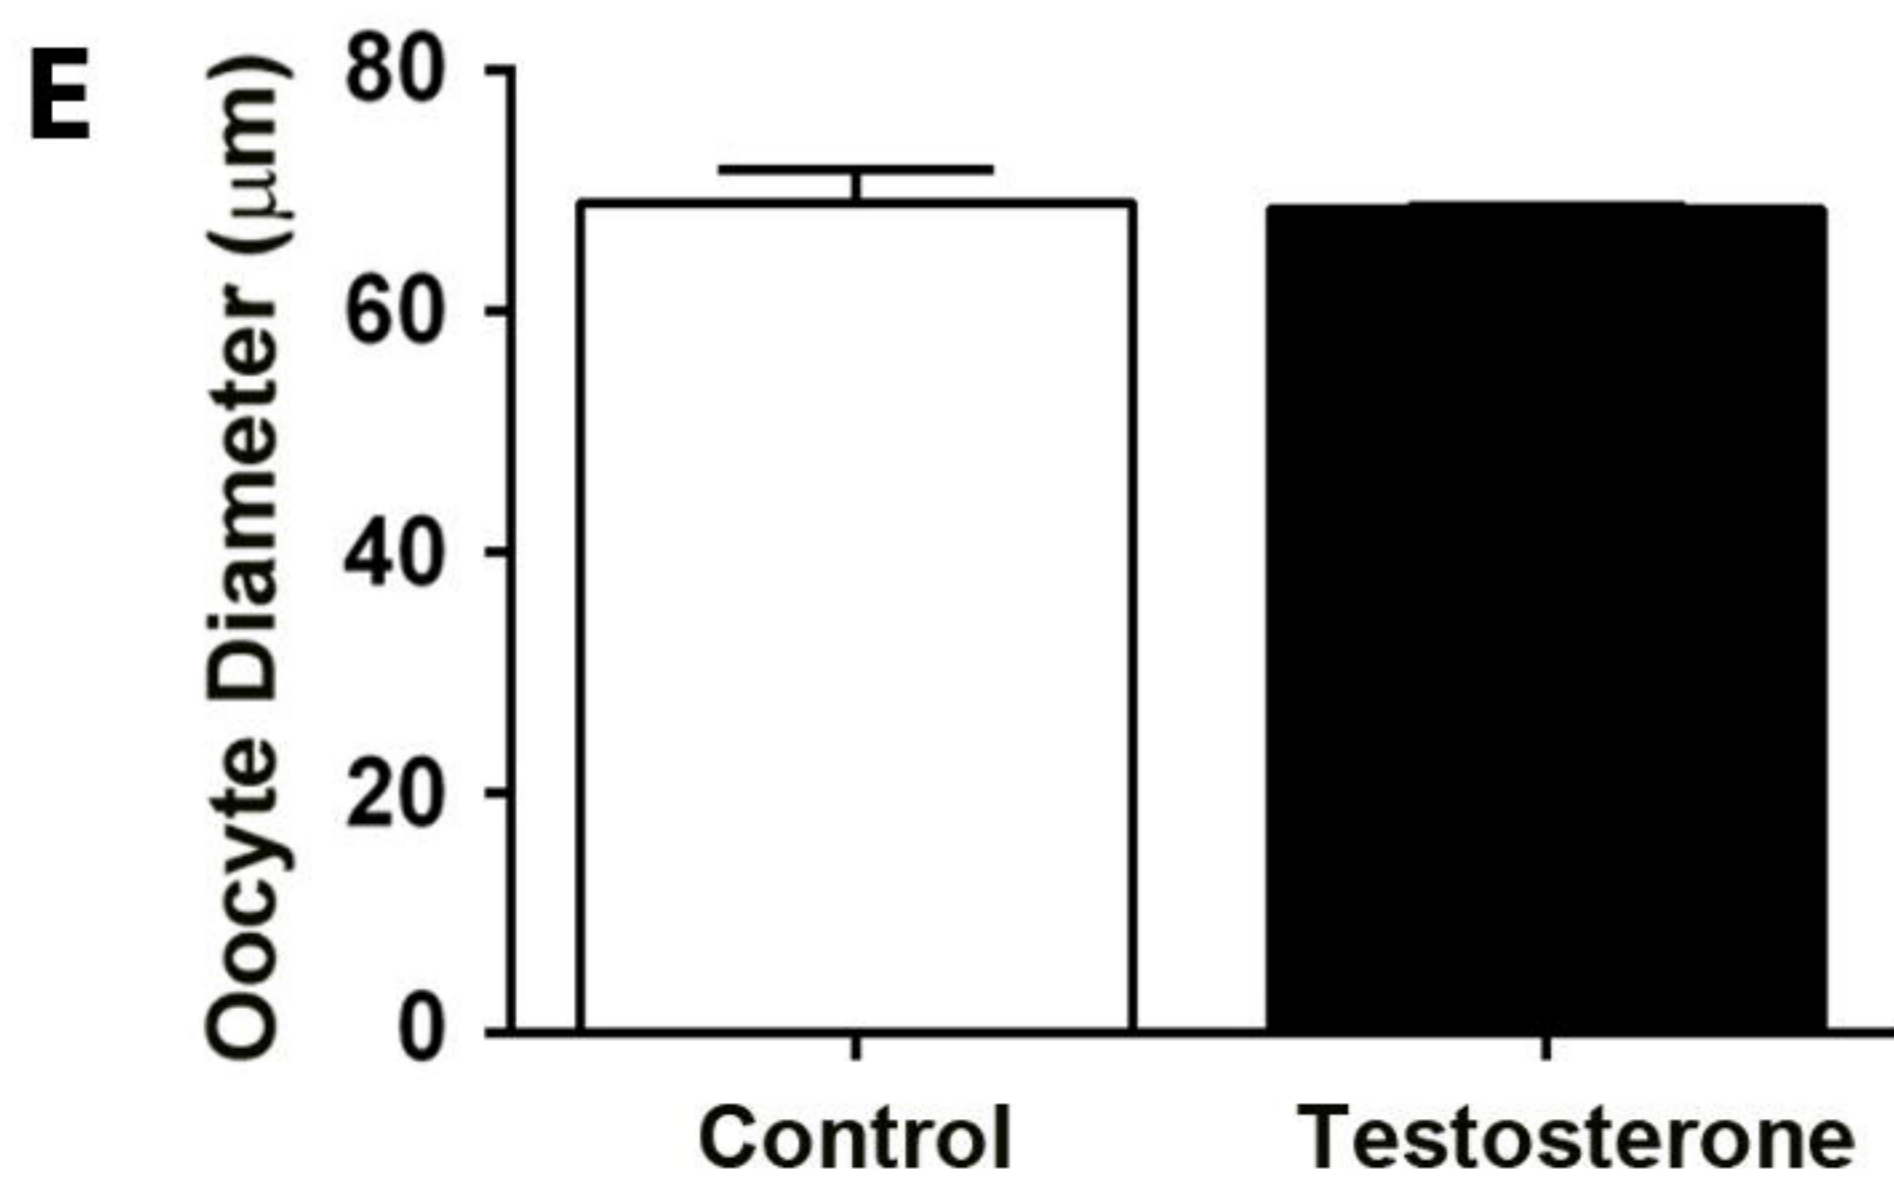



**A**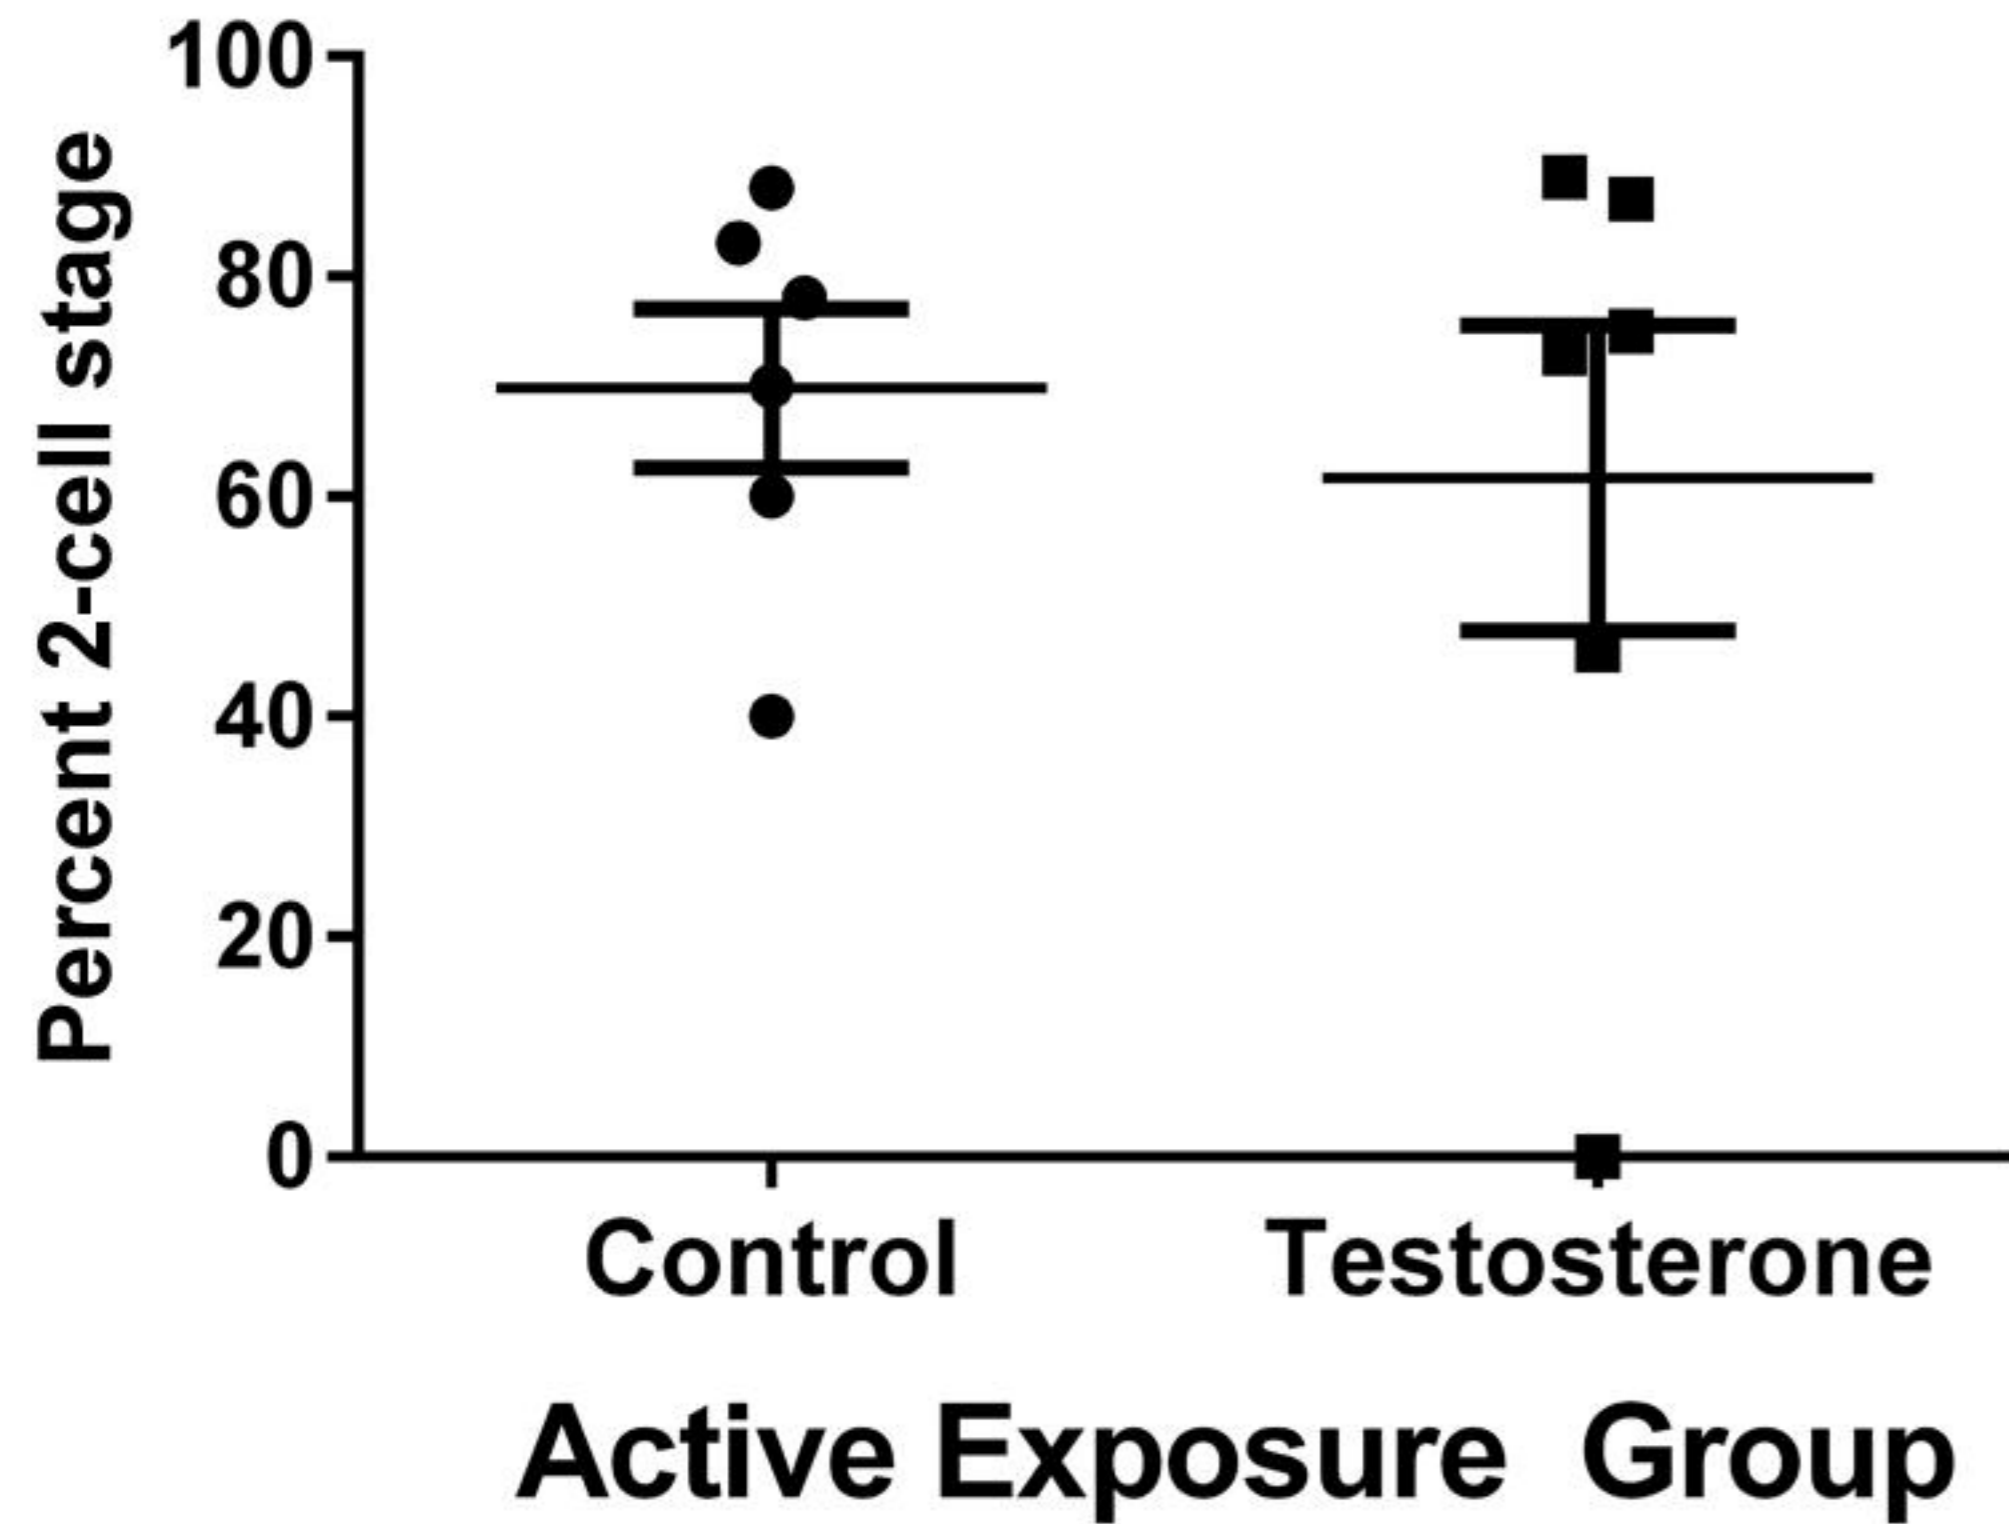**B**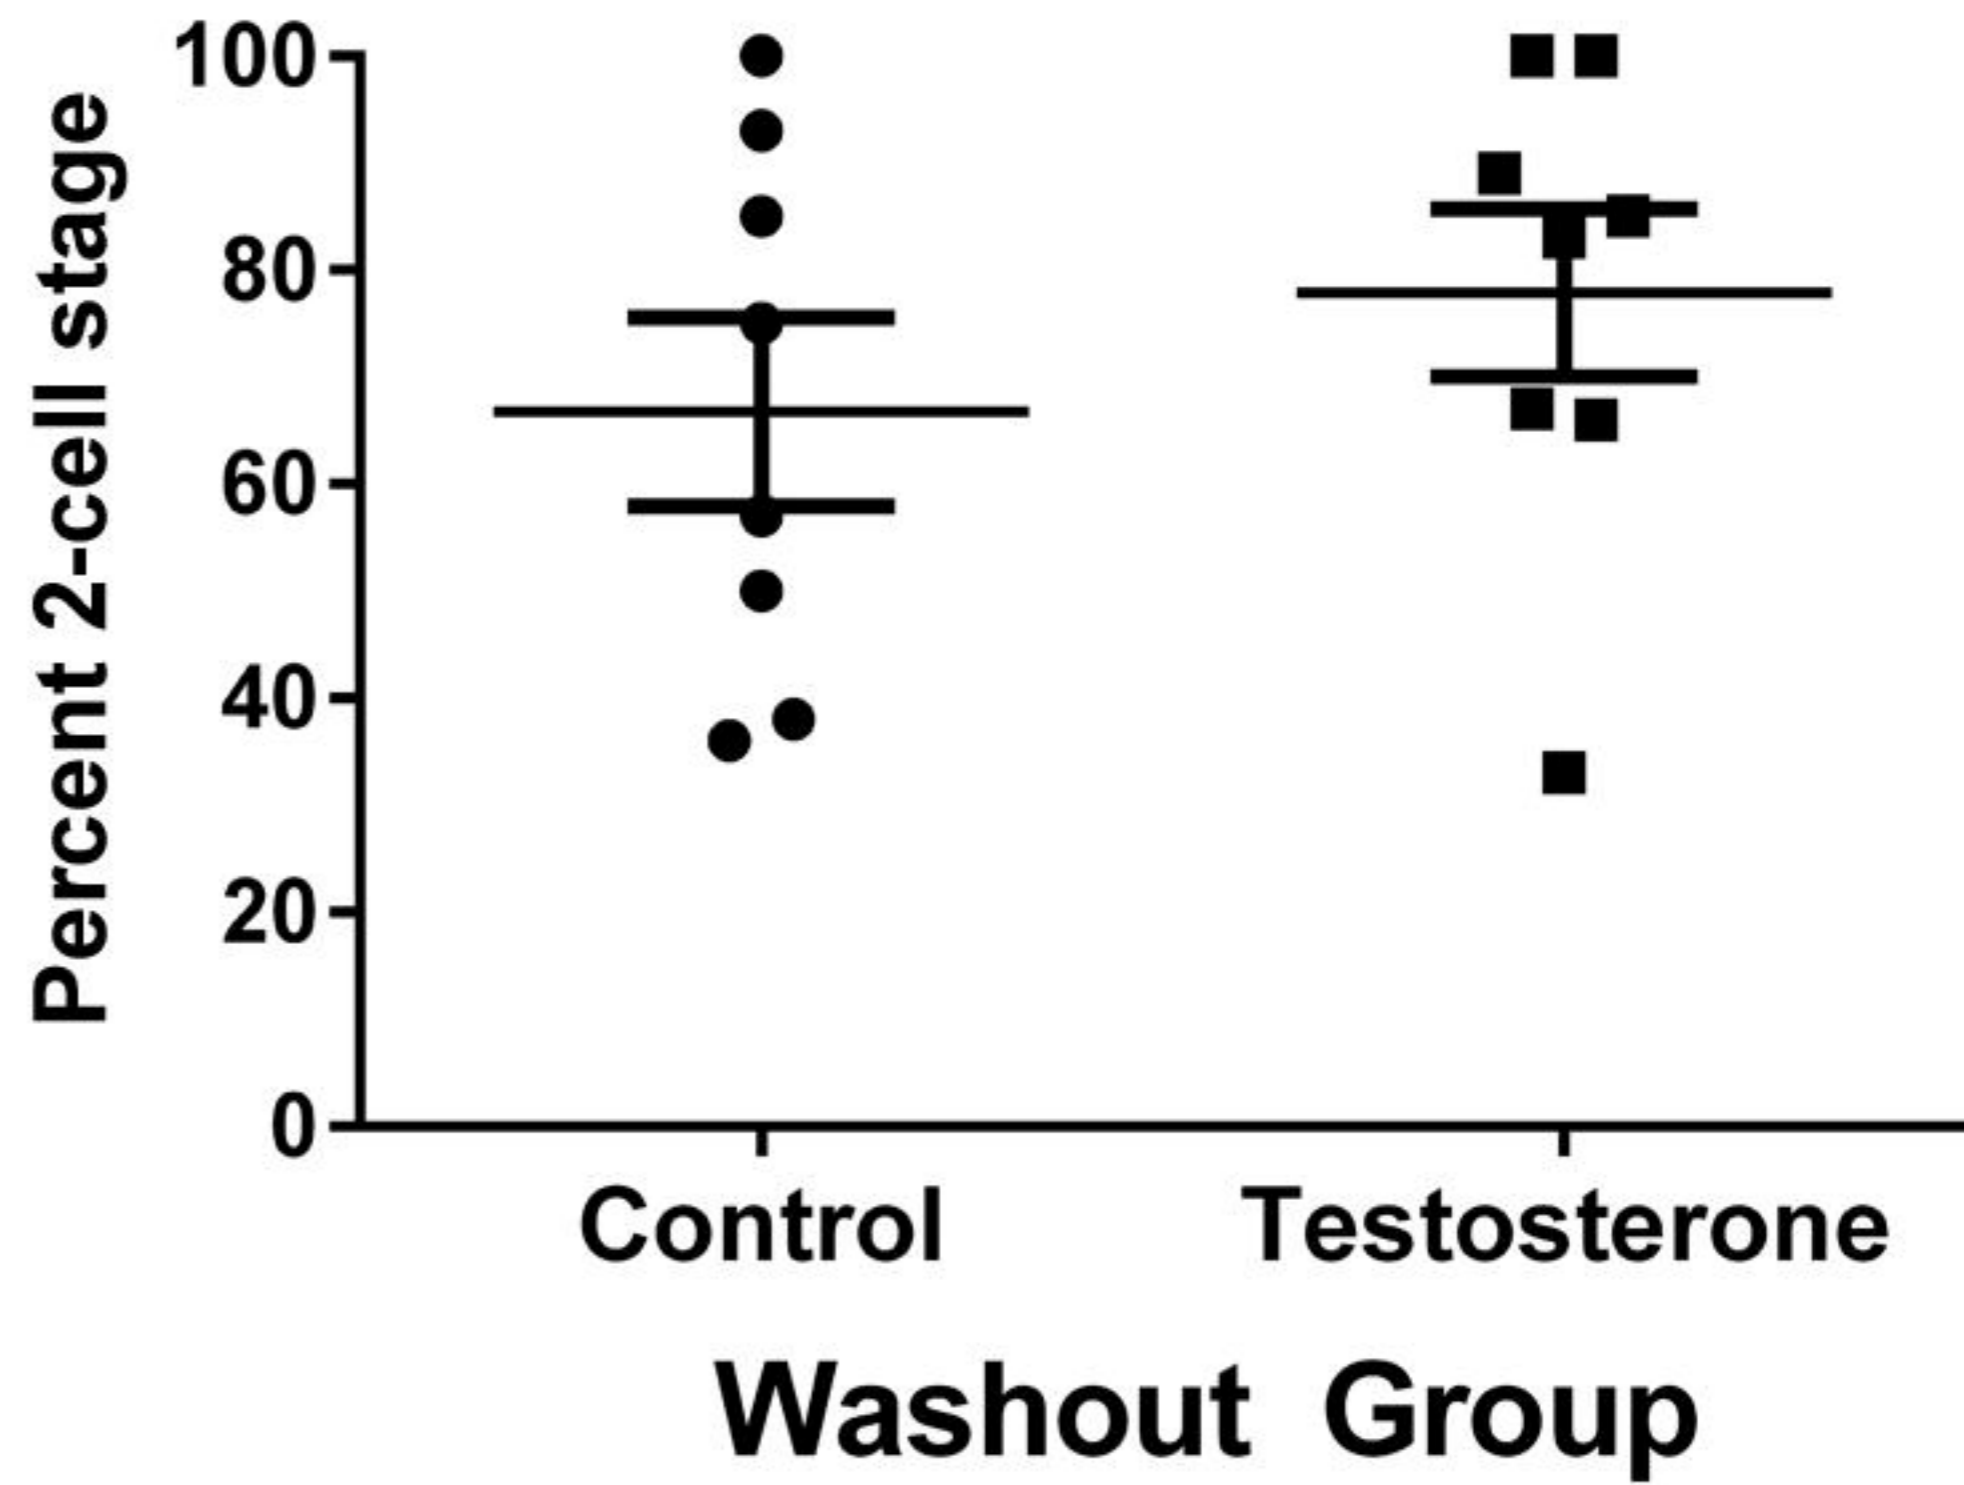

Source: https://www.biorxiv.org/content/10.1101/2020.04.09.033803v1.full.pdf
